# Supplementary material for: Exploring the mechanism of Shendi Bushen capsule in anti-renal fibrosis using metabolomics theory and network analysis
Source: Royal Society of Chemistry journal article supplement (doi:10.1039/d2mo00141a), 2022-08-15
Supplement: d2mo00141a1.xlsx [file d2mo00141a1.xlsx]

## Sheet: Sheet1
C	M	SD	Ben
5.67	8.49	7.41	6.79
6.38	7.94	6.94	7.49
5.24	10.24	8.21	8.19
7.15	11.37	7.12	9.22
6.79	9.41	6.37	6.57
4.97	8.56	9.04	7.19
7.24	11.08	8.67	8.02
6.29	9.47	7.34	7.37
5.91	9.11	7.91	9.45
5.82	12.38	9.12	8.22
