# Supplementary material for: Exploring the mechanism of Shendi Bushen capsule in anti-renal fibrosis using metabolomics theory and network analysis
Source: Royal Society of Chemistry journal article supplement (doi:10.1039/d2mo00141a), 2022-08-15
Supplement: d2mo00141a2.csv [file d2mo00141a2.csv]

	lable	Malonic semialdehyde	Methionyl-Glutamate	Uric acid	Mevalonic acid-5P	3-Hydroxymethylglutaric acid	L-Glutamic acid	Glutamyl-Glycine	N-Succinyl-2-amino-6-ketopimelate	Fructosamine	N-Acetyl-L-aspartic acid	Formiminoglutamic acid	Tryptophyl-Alanine	Sulfate	Arabinofuranose	Argininosuccinic acid	Dopaxanthin quinone	Trimethylammonioacetate	Tryptophanamide	4-Pyridoxic acid	Isopyridoxal	Estrone sulfate	D-Erythro-imidazole-glycerol-phosphate	N'-Formylkynurenine	Phenylalanyl-Tyrosine	Suberic acid	Acetylcholine	Leucyl-Histidine	Glutarylcarnitine	Butanal	8-iso-15-keto-PGE2	Norsalsolinol	Sebacic acid	Ubiquinone-1	3-Hydroxy-4-aminopyridine sulfate	Homocysteine thiolactone	L-Glyceric acid	Threoninyl-Glycine	7-Aminomethyl-7-carbaguanine	Arginyl-Cysteine	18-Carboxy-dinor-LTE4	Threoninyl-Proline	5,10-Methenyltetrahydrofolic acid	Glucosamine 6-phosphate	Spermine dialdehyde	Benzoquinoneacetic acid	4-(2-Aminophenyl)-2,4-dioxobutanoic acid	3-Dehydroxycarnitine	Mannose 6-phosphate
C-1	C	387.8012619	1359.522758	2183.474452	5201.073382	271.6292661	5227.82228	13527.89443	2442.876867	4135.637425	1972.936789	101.180401	3014.328518	19342.29294	10169.25226	4343.993217	631.3039219	2354.923746	365.3080822	15224.20736	18975.07838	1045.460411	483296.0879	309.1277419	18095.53603	33.49875389	2711.510394	34.43374158	1893.923712	14016.35311	2582.631436	6750.038522	247.5777687	236.0075953	11677.74858	3297.682129	4068.034762	1067.579877	2703.693362	888.9804315	127.9606251	2526.323104	2021.53647	1075.46715	4109.738409	2188.199681	3126.021312	9119.244248	361.2037909
C-2	C	257.4272282	1854.309665	2995.050776	8941.756915	846.0734783	4502.583811	13441.47878	2781.728211	5014.01198	2146.471295	30.73283244	2601.869897	23753.88925	16075.60258	4924.34394	1217.840866	1863.64196	537.3100447	17292.88947	13517.92247	568.6902236	360095.7917	439.3055968	32332.25241	1476.072515	2235.558068	202.8366832	4680.898706	15979.50122	2401.129802	17771.33659	3867.323585	867.3729182	4606.706693	2451.625415	4942.320915	770.8507697	4619.79871	14599.67557	5221.470323	2622.85528	2495.541136	371.6627197	2019.528587	1099.571204	1474.905543	4525.293423	465.9782224
C-3	C	9.883425903	1878.167774	1600.390912	4787.604038	170.8498138	4626.061188	6385.281754	3780.927386	3485.989696	1964.539654	23.03214028	4345.545676	22503.96947	13263.42815	8978.762727	2205.259078	3724.067015	1767.736717	14000.33141	19812.5142	3724.305262	467832.2214	334.0409191	13367.39009	352.5480994	510.2426476	95.88407604	2806.2067	9507.323082	4618.045224	5269.995418	992.6049725	532.559397	16133.93594	2244.658312	6421.611548	1484.358569	2668.649181	914.4626602	584.6344788	2811.380529	1008.764764	141.3127822	3915.37718	2700.295498	3502.521942	9384.697133	254.9726172
C-4	C	55.28124192	2359.135926	1460.769298	7913.136519	362.3444425	4990.959696	43116.98896	4844.704584	4365.092732	1490.968194	4101.618612	3105.809036	38779.60217	14304.97439	87.65381981	32.81648197	2958.573917	1132.547784	12434.65093	14289.87659	146.6570551	438814.0544	93.6842416	14680.98333	861.8985679	1009.68892	386.9628357	6641.78416	15034.98294	170.9894853	5158.61125	3126.490666	1278.720101	14101.51805	2552.065034	5055.060467	820.014927	3929.774376	996.5008375	275.0469341	3061.532947	723.9554741	116.7899402	3437.474693	2328.990954	3003.826232	8456.13681	154.8672838
C-5	C	5.357785875	2258.348539	2670.229616	3909.856759	138.0468709	4622.408503	22893.76729	4584.301746	3663.168022	1970.455085	31.26328421	2855.523537	37588.59791	12151.12857	506.882667	160.3055561	5092.885184	451.3891901	21530.73647	21775.01202	474.7271694	636006.6473	599.438116	15030.19838	144.3897449	655.2376683	174.8440988	2900.511857	20716.82671	299.6788107	8071.313396	776.9162695	721.257101	3503.826757	7534.81179	7339.259174	304.3293997	6691.536359	24916.02043	10130.81044	3306.776571	3877.501507	3230.2028	740.5182677	2.723705866	0	2326.860172	5361.292942
C-6	C	0.927872704	1386.126623	1053.902496	3431.766923	97.2112583	3118.199832	1576.563518	2496.928313	2134.719534	1642.187425	24.28129235	2669.40279	20054.75283	9548.640063	9112.256606	1727.221556	3943.360435	2486.201927	16602.95677	18945.10455	3978.506292	441502.9044	173.1795741	10593.47548	381.8795627	659.13795	83.74273238	2384.348039	8157.900444	2905.674549	6304.303412	1464.980545	586.216002	2512.593923	7246.011228	10574.85541	614.1808063	13558.29741	57656.77413	16694.22387	4003.457376	5080.712718	1633.990657	448.3311423	3.690305707	0	2014.022498	3983.517702
C-7	C	20.58668809	1899.00911	1491.846286	5468.437239	86.20784248	2197.651503	3592.712876	3540.508305	2457.615708	1478.941197	153.9588707	1669.33383	27956.56372	10973.74558	7551.582145	2096.818491	6497.11609	1789.140665	16080.00823	25934.4802	3161.967709	424932.3471	537.9326351	3997.541069	10.41643122	281.4827734	37.96125579	2134.802472	9114.952924	5686.654851	5376.368949	104.9146695	263.8631204	2323.792796	5723.789242	8532.839739	688.9713616	10905.2839	61398.63859	19403.88497	3915.082622	4428.451966	2322.299542	817.3422074	0	0	3360.097314	4741.089263
M2-1	M2	0	1705.284377	348.5987758	3294.892815	49.21400119	3379.720003	2094.307274	2158.365275	1393.406575	138.985972	247.98597	2492.175026	37977.68217	6484.807264	20584.89526	6338.148115	4781.734475	5497.932735	6354.192216	12509.27361	11447.13217	379089.9542	261.6093108	1485.968706	5.151887704	203.6941461	3.318389449	1893.454535	7002.78117	9041.050434	3253.410341	0	193.6399947	4298.340973	2043.157698	7111.302378	621.834624	9838.69844	24893.05787	2622.195257	3249.415883	3070.465724	3526.767941	1673.22771	0	0	5981.128971	6095.538191
M2-2	M2	24.31372352	2408.83256	1780.367495	1642.311683	131.4478387	5248.732721	17408.67034	7984.968002	3984.042393	2016.57558	52.83467823	3444.694742	56422.68167	8244.376293	232.0133292	94.33152306	8195.035123	1397.594298	12170.92726	14445.73146	93.77097174	475612.6946	746.1746778	6636.627731	0	1066.925255	9.266864263	3036.723854	13777.49413	115.1737579	11454.65136	0	322.4860233	4112.275249	3999.549463	7007.286524	218.82185	8132.417528	40253.86199	20710.78498	2929.369175	3968.394896	3120.964201	1464.929709	80.13041809	210.9843582	4951.074492	4158.398653
M2-3	M2	37.14646342	1259.152341	850.7515885	6173.289777	105.3143658	3456.665215	6083.096319	3430.50543	2576.61393	1211.763255	42.84733501	1873.521664	25213.08586	9100.088379	7317.067881	1724.211036	9428.87863	743.3088207	9584.399935	12829.10997	1333.716608	518515.3857	157.2511192	3529.308533	2.058797948	802.5884609	86.64746769	2893.824345	12566.95959	3927.236845	5448.408262	128.2259381	239.5915283	2465.048795	2649.015759	4445.126574	260.590833	3865.363493	27269.18752	14451.57349	2551.4689	3417.999548	2360.234958	1183.23926	245.5292236	350.0278037	3267.909117	1987.308715
M2-4	M2	103.0860035	1209.347497	1443.654895	4329.648085	318.3554721	4089.904992	7986.827169	4808.864073	3028.090579	1177.39845	82.60070315	2118.604409	32582.75688	6368.659808	2165.305081	750.502337	7129.70299	1539.600933	17148.41269	13738.00692	695.8478632	459285.9115	739.7814241	4665.156418	4.891436963	1871.979063	42.8066957	2739.761962	21840.32326	843.0710914	4862.93306	51.74616077	252.3392682	4235.625939	3223.381614	7624.552693	349.0961043	7388.49098	33263.32433	3887.640102	3072.027087	2984.447776	2157.193779	1265.069062	721.2583693	731.6478579	3570.237983	1630.815132
M2-5	M2	0	1532.341742	478.5791366	3000.977965	62.04478638	2252.780108	1506.872524	3084.429752	1562.488925	1252.748225	27.22276635	1083.868079	24266.40564	6012.9276	6809.659786	1797.469718	3628.612958	11990.84504	5053.971719	12240.08771	11101.15813	480320.2543	133.3598644	1890.97349	14.56848614	142.5206551	10.1754501	1759.541655	4527.116942	15067.84899	1383.905439	59.59916184	232.0832227	11509.32919	2097.049413	4137.278224	1209.514455	5135.921893	612.8031364	67.36216965	2495.605175	1748.841218	2406.00267	2527.737229	1932.825795	2302.885136	7890.785826	1608.587769
M2-6	M2	250.5352183	2033.217519	758.5775422	8868.205098	132.5752807	1750.196719	5574.752203	3986.170545	3412.108039	857.8023326	506.7630194	1422.704188	26799.92138	8680.161437	6152.853451	2049.963303	6901.706883	3353.101713	9472.871248	11034.31181	2712.821084	445457.554	751.1495245	3635.668184	1.74169217	406.0178888	39.56139825	1790.102541	6963.069504	3262.285895	2494.849674	50.15450652	252.9249	7482.280401	3673.044874	3762.717762	399.3628151	5278.468236	740.6483688	101.0136779	3241.867168	2223.935658	1046.018311	2010.671819	1433.147523	1700.410148	5405.631201	1157.853212
M2-7	M2	2.75981624	1249.939842	744.1251398	3392.281075	44.90039428	3204.258148	1640.492594	3785.882888	1810.837616	1900.487394	19.26052065	2472.67978	23631.31518	7083.665101	9130.19307	1778.588381	5122.943287	1743.935811	4379.363914	12383.93646	18885.85153	558255.4576	105.8398455	1777.291221	5.604680815	271.8826167	14.06779975	1709.72249	6241.052154	15153.71704	5303.166736	57.80284953	201.8261693	11106.70256	3614.029914	5528.475684	812.2153776	7914.752582	755.3647867	39.57488018	3872.156233	2547.793979	275.2337207	2268.341389	1686.706384	2134.495545	6785.8606	840.1952935
M4-1	M4	7060.500331	4321.429017	3142.892444	2172.923654	301.1578619	3829.32803	5774.971142	4609.188178	4495.711026	1788.030273	2579.351136	6097.468453	48600.23541	13748.24577	1600.535394	318.5441937	6459.744299	1987.511746	38028.44522	38829.7653	398.3289608	93828.76749	919.9488456	8316.475219	56.97835174	4407.942094	0	6518.490875	7164.867301	1933.486709	3921.623729	0	96.35459127	4449.731214	3065.012245	8382.441375	365.4097651	18310.59509	927.3656753	46.00895636	4214.602616	6792.426519	673.3621739	779.2624769	0	0	3839.032736	8949.747113
M4-2	M4	4018.649888	2807.677317	3213.111187	1012.445925	0	2751.043669	1371.240232	6604.587371	671.7051388	3907.864458	365.9374586	7243.539471	46113.31103	7320.79657	3615.186341	3108.279348	8556.705947	2440.708166	45428.77957	36266.65247	640.8259733	88068.64855	769.3424205	5802.8181	0	2643.595552	114.9463185	3350.909943	7752.443613	6130.923889	9471.999662	0	269.2714412	10740.08811	6132.308753	13047.60966	842.8141578	13795.17675	27605.79379	1935.995402	4968.00959	7228.617561	801.8295581	1415.869178	0	127.4126912	6883.877591	4676.030605
M4-3	M4	4974.69454	1951.233193	2220.465542	12035.51549	43.85844896	1279.230135	5387.476523	2298.703289	2416.82925	221.3572206	0.041050335	2127.899278	43465.91604	7492.507826	2427.520335	4355.581935	8413.518544	18684.33728	36353.68013	41287.89085	398.2739198	72417.97085	295.8907171	12739.30855	0	3085.837737	321.6276984	2020.97373	7422.011229	5187.71823	1765.986181	66.11312465	408.5751619	2569.59604	2687.012678	4565.325452	331.6848144	3456.88819	30180.21204	17415.64817	2559.586279	3310.249924	2055.231153	1181.650802	323.1345042	372.4720457	3527.450707	2564.494052
M4-4	M4	3096.659307	2591.308695	2051.114126	2592.558868	62.30982841	2006.039817	2260.862224	7453.603034	890.0308929	804.6967219	409.509919	7875.981263	39588.83475	4820.553819	3219.357022	6033.464327	5609.37703	14773.44165	41391.91143	31935.4927	2502.687543	98962.31909	227.9839488	4366.559744	0	881.1682014	36.71709707	1159.494938	2606.834747	7246.016774	1630.801617	0	200.2608827	8559.285853	3025.05943	7330.209245	1110.077255	3665.320046	14062.63931	2196.477278	4338.787896	5801.342093	2433.486927	2148.310895	1105.955507	1032.654848	6541.141846	3362.702053
M4-5	M4	7301.741772	2243.717257	2384.877212	12357.50607	59.80041675	1702.213163	8029.397868	6400.283502	747.1414869	413.8426407	143.8576071	2634.987078	41113.34718	7634.928178	3691.669027	8526.808399	11556.38008	7186.849337	51305.03239	34249.48474	1062.425992	156466.2513	2067.38876	14190.53135	63.4781287	1154.6553	0	2852.880149	3555.162255	3741.575961	1426.329207	0	311.0763911	14689.34256	579.0392041	7355.136991	673.7744752	4046.622531	688.1554395	168.8092952	3193.560355	4040.789657	947.132475	2611.175417	1917.325607	1982.09129	9091.973882	976.6626696
M4-6	M4	693.8776033	1327.619807	1000.175531	236.9565791	94.55478993	1566.306748	4762.937503	5457.748682	1419.827244	588.6523014	0	2324.800839	24009.73169	6957.557211	2948.075927	3523.593931	15837.66129	4172.360101	34230.07616	26433.20582	2648.427515	430187.7619	1086.389417	4025.31038	0	722.5370416	0	1443.169535	9154.484396	8249.735229	3014.992005	15.95209789	336.9892073	10064.42047	556.6989903	3732.853355	1335.531418	5090.100277	627.2389022	108.3327092	3727.551781	3713.9476	247.900044	1966.865778	1344.015844	1572.844881	7225.406742	805.5623777
M4-7	M4	1629.765373	1536.687922	1151.832337	2587.457121	196.3742949	3520.967704	5013.052713	3123.541673	3156.778728	2081.585596	90.58084046	4373.326286	36307.38759	10551.46357	3303.463915	2918.648572	17055.33851	3663.855614	9714.891125	24081.76794	3260.749455	444092.2054	656.5281046	8413.414827	0	918.3802735	198.3847152	2691.569631	3558.110504	2409.825312	1369.752773	36.90904328	151.8418609	8177.714836	741.9003723	6915.967502	701.1144453	4027.773403	628.7633173	133.2796655	4097.229573	3567.301388	71.06651301	1909.881571	1474.656346	1455.693919	6507.231476	508.4996262
M6-1	M6	43.67471722	2160.916806	2951.760907	1570.640291	97.51764925	2019.746927	16459.52142	4922.26362	2302.263302	1259.533902	154.591742	4348.809777	73895.51032	6371.231064	15879.86388	11138.11775	11026.29489	3220.938586	12406.57318	13235.03736	7837.096379	712492.6889	1564.434603	21336.72332	181.8969806	870.0453146	213.9898531	4553.532812	5575.524149	2809.209084	4701.919681	803.3844304	1177.970227	30074.09796	1404.116115	10824.49768	1698.086122	7293.144037	736.8761402	0	8023.007723	906.1488465	39.94758198	4648.327636	3651.956039	3799.932212	14191.29848	39.22898845
M6-2	M6	21.95962079	1819.689624	618.5895127	822.7016124	240.1932035	2668.067531	23753.3155	6269.601645	2487.817855	1463.366108	111.6705385	3652.527546	77139.17971	8684.959513	10648.43664	6999.462261	16350.28275	2306.147886	12118.65459	11628.38051	15629.29094	789722.5709	1380.845769	15372.58785	44.64944031	171.4836028	0	2253.366702	5877.335529	3821.276601	5097.930644	822.3918096	879.5552875	36469.7744	1048.268928	9340.552539	3422.938691	4369.852033	1045.573654	0	8188.089311	349.5681679	78.25183143	3968.270018	3947.841287	3978.445573	14119.80239	199.352281
M6-3	M6	1531.140572	3208.830692	2159.974646	1322.998633	380.8349931	2230.504968	17441.35096	8149.326587	3280.536043	989.1294118	909.704921	4460.420795	93324.80821	7745.946649	3486.692147	5047.671998	9402.316914	1889.998605	18623.37525	18949.00855	94.77051635	290830.7492	1399.823455	12351.1797	313.9013974	4183.154984	318.414535	3258.928265	9549.666301	2723.16521	8213.372698	466.4341304	1022.525177	39997.26262	1097.870816	11283.59482	3851.638146	10538.98858	1403.039906	0	8407.752134	87.80079802	71.71582395	3318.449208	3067.142822	2846.924275	13516.27871	0
M6-4	M6	10249.88701	5424.702808	1936.695401	7255.643199	780.3686743	5735.586842	7694.512551	1785.589266	8449.921523	490.1695443	3379.680879	11418.16028	130151.9963	3931.911383	326.036084	370.4932793	3401.670069	3735.133541	60244.1876	32758.58875	150.020811	49553.12266	1061.723664	2332.060945	43.48961356	3628.479711	0	5973.020416	6403.909707	1020.33545	8967.16891	38.66589424	352.9975142	36748.86839	1172.333513	9293.048161	3177.759299	4302.697702	1904.385027	0	7847.241697	64.6690702	47.4922759	2698.258132	2507.337169	2560.43848	11400.96338	0
M6-5	M6	696.0221354	2166.669616	785.2323538	2705.733229	143.4912219	1965.986656	9573.872564	5942.93491	2939.415397	512.1722396	165.2945289	2690.257249	58152.72887	6487.72759	3214.077388	4010.017008	12260.76586	4396.907656	11068.98561	12321.99188	1425.707347	478543.9245	1496.716097	7259.551237	7.273500093	526.0165579	89.92955654	3397.524074	7387.061864	2805.004723	3831.741761	254.0853379	651.7264532	32569.67804	2174.368932	10587.33643	5493.239237	6629.731504	8007.055328	3288.004032	11260.52331	75.9099311	33.48975169	2401.888825	2391.369043	2617.057101	10004.60796	22.61504273
M6-6	M6	6365.90774	3513.7214	4727.373778	1739.854886	640.3640941	7135.377197	3724.070371	5915.202452	2654.215149	757.2881973	665.7001317	8205.341302	115191.8435	9631.719323	249.6060856	139.647779	7435.677791	1894.480423	38638.37881	35100.73973	130.3278163	100783.8489	1222.214323	6010.596583	603.5798266	3679.244191	686.5288187	11281.74619	11098.28662	780.0812024	7708.130355	164.726711	638.8176796	26757.18114	2506.725763	8048.721644	3398.529794	5324.431069	3807.114701	0	8116.242698	236.7285563	27.1585866	3131.633996	1767.172323	2254.869877	9612.799736	157.3162884
M6-7	M6	7031.040756	3656.752274	1537.255448	1177.792323	409.1982197	2928.368752	10834.63282	4823.455904	3493.946419	1806.862794	454.8076526	5581.307122	89203.77359	8958.030744	3682.346278	1218.490297	7505.698949	4967.770279	42874.32755	35343.50507	332.8201597	87070.58646	1279.506286	22356.96704	289.37703	3916.811501	554.7446484	7594.964745	4609.928298	1462.570311	7594.999751	51.85196326	467.9772574	29477.83021	1883.567672	8823.71463	6205.42154	6915.91371	10466.12059	3337.486636	9850.68716	188.6757689	4.876826457	2898.596615	2062.743452	2973.738349	10433.41132	134.7203687
[truncated: 11 more columns]
