# Supplementary material for: Exploring the mechanism of Shendi Bushen capsule in anti-renal fibrosis using metabolomics theory and network analysis
Source: Royal Society of Chemistry journal article supplement (doi:10.1039/d2mo00141a), 2022-08-15
Supplement: d2mo00141a4.xlsx [file d2mo00141a4.xlsx]

## Sheet: neg
C	2015.17	2011.14	331.137	2363.2	59.9884	990.014	216.399	18.0384	59.0619	50.6737	1956.01	421.168	83.9677	113.448	0	8529.8	0	0	0	3318.97	4275.06	12496.3	4017.56	1595.49	10397.9	953.733	5.51728	184.36	2057.09	0	0	818.437	0	0	353.513	0	0	0	0	0	0	515.797	0	0	18915.8	201.498	512.413	313.269	0
C	1279.99	2733.3	262.59	884.183	108.777	297.483	303.698	356.637	530.932	80.6861	1318.29	399.388	111.194	43.9266	0	11321.5	0	0	26.5977	4102.48	5002.26	12757.2	4970.45	1814.47	10444.4	1306.16	68.2652	184.665	2383.9	87.0333	0	800.587	13.1982	0	398.664	0	0	0	0	0	0	330.626	12.2507	0	19118.4	146.018	30.3011	61.0919	140.31
C	750.54	1862.43	199.015	647.984	65.7329	223.153	214.149	364.854	571.114	129.2	1085.57	425.464	29.89	13.4932	0	12421.2	0	0	0	4937.98	6193.41	11699.1	5387.94	1500.45	9024.02	1677.98	15.4846	180.717	2002.51	147.195	0	525.274	0	0	289.934	8.54953	0	0	9.46632	0	0	315.546	0	0	21296.4	204.321	1020.56	623.243	23.8332
C	1258.03	3254.25	365.603	807.922	114.323	367.875	357.994	897.641	974.413	186.814	1372.01	917.965	487.911	110.833	31.1814	20655.4	0	0	0	16151	17819.9	17142	13479.4	5525.62	11513.1	5888.06	284.134	1759.12	3216.96	1408.24	46.0949	374.781	0	0	0	0	0	0	0	0	0	101.263	41.0039	0	39411	259.86	2326.91	1088.4	69.4482
C	975.46	2307.56	162.065	619.402	123.928	226.84	238.871	684.33	924.7	97.7758	1129.16	482.345	45.4186	42.7522	0	14465.5	0	0	0	7944.69	10455.7	16256.8	8983.56	2773.74	12184.5	3075.29	56.3578	413.726	3392.67	189.45	0	787.213	0	0	401.914	1.32769	0	0	0	0	0	465.618	0	0	35806.3	254.848	911.058	520.22	41.3021
C	333.964	1070.35	34.8041	177.156	22.4407	102.195	103.27	273.726	596.428	62.7348	477.068	281.571	0	21.9163	6.67042	7146.71	0	0	0	1928.78	2580.38	8737.34	2451.66	883.668	7473.86	660.523	6.53434	0	1383.2	0	0	539.035	0	0	367.214	0	0	0	0	0	0	379.672	0	0	15559.6	119.417	402.788	222.452	0
C	395.256	1674.96	151.664	241.709	35.1462	100.917	181.715	378.142	590.415	136.583	663.219	633.361	66.4342	37.5852	29.7941	8455.94	33.5347	0	0	7562.14	8045.74	6817.96	5991.88	2666.37	4482.94	3129.99	140.991	918.103	1678.17	613.021	21.6081	87.2355	0	0	24.1843	0	0	0	0	0	0	0	10.4154	0	18521.7	238.327	1539.89	744.425	22.885
M2	469.743	2320.93	141.516	214.208	139.92	158.664	355.991	627.082	651.947	156.807	746.054	334.454	22.4029	17.287	0	11448.9	0	0	0	12331.4	12712.8	8558.19	8645.77	4631.86	5173.32	5360.54	536.592	1077.12	1696.08	1391.95	14.7592	0	0	0	0	0	0	0	0	153.128	0	0	26.8377	0	24372.4	311.255	2249.86	939.959	0
M2	762.49	2809.07	124.277	632.539	158.189	255.811	607.891	752.743	1006.74	254.011	1257.8	481.089	87.718	105.592	0	18977	0	0	0	16923	19415.2	16410.1	15008.4	6122.01	11368.8	7538.92	527.886	1846.53	3714.55	1695.18	119.988	0	60.0878	0	0	0	0	0	0	277.435	0	0	46.2271	0	38184.8	545.219	640.966	239.42	10.9389
M2	391.173	1075.19	80.9457	292.78	9.82728	95.6805	187.319	294.069	358.713	62.21	474.577	130.776	11.0246	43.1454	0	5519.03	0	0	0	6349.45	6098.71	3708.61	4169.47	2375.32	2393.86	2801.66	283.449	757.139	712.897	873.751	28.3575	0	0	0	0	111.562	0	0	0	0	0	0	0	0	11858.1	154.568	1234.45	542.678	0
M2	413.439	1694.95	202.578	559.444	320.418	137.002	605.139	377.105	785.953	143.858	855.413	36.7785	240.08	122.54	0	5223.53	0	0	0	16927.7	6359.4	1178.84	2263.88	7437.47	263.625	4947.23	2666.55	4159.13	192.959	2207.23	1201.26	0	1386.29	289.765	0	243.744	0	327.96	746.111	0	0	0	136.544	0	7065.37	148.483	322.702	5.62436	0
M2	361.669	1545.28	186.221	407.583	235.255	124.382	590.102	442.718	779.309	201.604	691.189	237.321	8.99533	73.9315	0	8466.26	0	0	0	7199.39	6729.48	4641.42	4706.04	2493.06	2930.65	2875.67	263.021	759.316	1072.62	962.267	7.85469	0.582817	0	0	0.135179	78.6389	0	0	0	0	0	0	35.155	0	15898.1	247.668	1279.81	505.67	0
M2	478.157	1737.03	245.065	466.843	210.882	186.725	674.081	465.242	870.762	248.245	731.716	299.847	15.5818	44.9573	0	9549.1	0	0	0	8212.55	8136.96	7265.77	6329.89	2611.77	4751.01	3101.91	185.049	863.583	1467.28	820.433	13.0688	76.422	0	0	75.6657	0	0	0	0	86.7368	0	0	35.9842	0	24305.3	305.968	1123.04	569.216	116.681
M2	351.498	1324.93	182.088	381.991	251.708	114.315	554.06	392.837	650.083	249.196	634.323	224.911	0	69.3177	0	8360.21	0	0	3.01949	4674.63	5584.56	6881.5	4406.23	1537.86	5112.01	1534.31	0	465.009	1587.55	247.347	0	264.554	0	0	0	0	0	0	0	27.0304	0	134.272	6.40287	0	18030.9	274.056	882.728	511.297	16.9842
SD2	355.381	1454.36	155.05	382.548	523.547	113.553	979.958	442.508	809.437	390.347	727.846	324.494	201.776	197.444	88.3369	5972.23	7.68968	9.52652	31.1296	9805.09	6322.48	2279.64	3506.73	4293.03	1118.68	3891.57	883.709	1862.29	475.183	1359.35	289.473	0	353.258	12.2882	0	323.58	0	41.3471	109.109	7.59189	0	0	103.382	0	8765.13	166.756	229.847	99.4894	451.17
SD2	185.263	1235.62	143.178	208.016	471.321	116.531	935.001	403.129	756.281	393.933	672.972	284.272	36.7487	178.827	5.02958	6625.09	0	0	0	7796.98	7892.26	5236.52	5516.03	3041.33	3394.2	3247.49	388.184	1028.97	1399.32	1441.93	67.3356	30.8165	0	0	22.505	251.243	0	0	0	80.3272	0	0	58.6614	0	13439.2	237.369	194.22	124.197	21.3758
SD2	334.904	1427.21	188.018	295.224	436.455	93.16	948.648	392.003	852.398	394.623	724.503	550.206	277.312	183.001	0	8384.15	0	0	0	7356.52	7883.83	7341.87	5841.59	2514.51	4942.9	2644.31	194.799	758.076	1743.95	618.94	69.4203	246.318	8.24056	12.4306	19.4123	6.79523	0	0	0	103.554	0	0	40.7632	0	20999	290.471	960.807	437.85	91.5582
SD2	303.164	1610.9	182.751	373.152	562.736	121.764	1097.81	442.057	724.149	431.286	700.845	768.999	75.6486	157.183	50.2125	8627.31	35.1172	27.268	0	6937.92	7743.38	7800.92	6042.23	2442.75	5248.19	2411.87	141.112	877.883	1793.06	967.294	17.7006	259.773	0	20.53	41.8152	71.0332	0	0	0	0	0	80.6058	55.5987	0	21352.9	310.549	1340.5	740.03	5.26172
SD2	141.331	757.446	42.4326	183.29	323.07	80.8533	614.05	267.622	461.487	251.069	461.64	267.941	53.39	65.8982	0	4719.49	0	0	11.4761	1100.28	1134.52	7077.85	1051.1	915.495	5947.15	465.774	30.4221	42.1256	987.034	0	0	489.018	0	0	360.418	0	0	0	0	0	0	339.306	0	0	14301.8	245.055	129.357	182.069	23.6013
SD2	227.311	1148.87	115.26	228.232	501.63	104.698	986.608	442.029	782	446.585	634.864	318.906	60.6384	147.014	0	8022.06	0	11.3029	0	6151.96	7218.85	7838	5615.3	2320.77	5606.88	2242.65	138.779	778.867	1649.14	508.38	0	271.148	0	0	107.218	0	0	0	0	73.2873	0	201.791	41.7454	0	18426.7	286.852	607.377	471.279	54.3956
SD2	432.922	2005.34	226.44	337.433	823.829	216.856	1519.08	622.867	1163.35	714.165	1083.71	260.352	167.752	325.672	0	9230	0	0	0	20635.9	10264.2	2534.67	4545.26	10205.7	819.091	7805.56	2889.58	5020	521.953	3251.15	1195.3	0.758928	1504.02	326.387	0	737.971	0	361.759	850.896	44.1467	0	0	222.843	0	12067.2	221.781	898.134	289.66	149.543
Ben3	964.587	2277.48	51.3576	610.594	489.606	220.784	872.8	788.333	1290.53	280.215	1244.59	392.368	58.9221	169.445	0	13429.5	0	0	0	16433.1	16712.2	9793.43	10669.6	5805.7	5781.19	7067.59	652.682	1676.63	2105.42	2496.35	54.2486	0	0	10.2801	57.0783	185.513	0	0	0	320.776	0	53.0167	57.4291	0	28662.7	403.703	589.218	121.242	0
Ben3	323.265	917.83	34.1051	341.218	236.623	93.4703	468.511	254.265	518.383	176.14	560.295	191.449	0	54.8384	0	6012.44	0	0	13.278	4963.97	5250.94	4933.61	3901.86	1602.13	3205.59	1814.94	44.655	622.743	922.938	388.613	4.50546	115.134	0	0	0	0	0	0	0	0	0	18.4802	19.0475	0	14565.9	209.49	818.897	470.354	40.4738
Ben3	438.182	1215.93	76.1586	531.556	446.178	149.522	875.079	510.111	762.078	266.983	814.32	871.755	112.727	130.983	104.534	9145.4	0	0	0	6489.49	7812.09	7794.24	5870.32	2139.08	5460.3	2546.54	115.645	707.078	1955.6	567.08	23.6851	202.844	0	7.63444	29.0908	0	0	0	0	168.508	0	0	35.6523	0	23463.4	285.527	1046.04	482.312	66.018
Ben3	559.377	1298.52	106.735	510.486	330.075	140.639	896.03	462.372	748.12	260.116	769.718	382.27	35.8348	103.592	0	9340.81	0	0	0	6203.33	7167.37	7759.08	5497.14	2182.93	5165.2	2101.41	85.0335	594.43	1722.9	538.864	0	221.74	0	0	31.9109	38.9285	0	0	0	0	0	0	12.0847	0	21545.5	352.147	1130.12	722.543	0.694976
Ben3	452.261	1011.82	24.5176	396.176	316.845	132.834	837.511	432.544	722.371	199.594	689.315	331.992	29.4776	49.9695	0	7444.31	0	0	0	6661.8	6815.11	5934.08	4894.94	2112.66	3899.81	2450.58	186.495	591.201	1209.99	721.609	4.57642	60.5045	0	0	26.775	0	0	0	0	0	0	44.2355	39.8122	0	18245.6	272.524	1214.52	783.69	0
Ben3	433.306	896.48	60.024	455.271	388.4	140.871	749.001	397.343	625.462	298.548	701.582	491.066	151.865	86.028	0	8221.21	0	8.21299	5.66992	5975.86	6458.44	6902.92	5017.12	1899.42	4502.4	2001.68	73.8293	774.186	1465.58	536.513	22.1064	157.625	0.0199725	0	46.4986	0	0	0	0	0	0	58.9782	11.096	0	18626.2	292.116	1097.23	632.527	13.7508
Ben3	542.18	1268.2	72.8213	542.881	540.009	151.771	1065.07	529.842	743.916	419.282	784.469	379.44	615.826	151.47	78.7336	8728.07	0	21.7826	0	12334.4	9188.17	4856.19	5735.34	4397.8	2641.48	4719.05	585.729	1533.75	1241.44	1820.8	59.7928	4.27031	156.963	0	54.3478	123.173	0	0	0	0	0	0	87.1839	0	15426.7	268.76	338.879	205.468	450.522
M4	12047.8	28236.3	7211.58	1799.89	894.616	733.764	3117.46	2475.25	1543.24	211.83	2948.48	75.2645	1835.87	809.258	152.787	2567.53	0	73.2945	0	8748.12	332.897	135.276	54.4726	1267.49	81.7643	353.633	1908.51	429.015	73.6095	7.62775	110.981	0	190.478	262.243	175.561	0	75.2435	0	0	0	0	0	82.0919	0	213.525	0	478.94	79.2178	162.216
M4	7837.04	17379.9	4469.79	1665.87	274.007	532.498	1320.77	1345.58	718.418	290.444	2888.66	8.55254	2338.54	800.514	284.927	8.94626	0	0	0	2947.54	154.001	63.3382	60.509	125.413	20.4583	236.004	1196.03	334.657	36.6643	0.629979	118.316	0	0	0	0	0	0	0	0	0	750.497	0	159.671	760.77	474.833	0.0759454	642.56	0	0
M4	6243.85	14074.5	3630.74	1562.86	399.807	335.92	985.059	1251.69	625.917	281.895	2117.58	0	2012.35	495.792	72.2592	46.2457	0	164.84	185.798	2607.94	141.687	81.3111	112.081	23.3692	53.0872	156.969	1305.77	286.939	6.53618	0	194.467	0	748.386	58.2761	21.938	0	0	0	0	0	951.609	0	113.971	826.45	640.409	0	516.035	40.7909	0
M4	4992.75	11782	3238.8	631.858	306.249	364.202	793.512	628.004	317.022	136.074	1361.15	0	2378.49	608.901	1287.09	283.318	179.516	426.257	0	21535.3	88.1932	37.7631	207.49	855.759	573.126	293.235	13492.8	672.459	860.908	0	8444.84	28.7799	381.292	4390.22	55.281	0	1626.43	0	0	0	0	0	284.443	39.3229	472.647	0	1245.82	408.566	54.1621
M4	4182.77	11936.9	3055.23	638.602	208.759	299.512	280.948	576.953	0	61.2154	960.678	1225.95	35.7035	0	0	22650.7	0	0	0	6973.7	9249.89	37761.1	9294.55	3233.97	32594.1	2241.43	254.49	10.7887	5149.52	0	0	2472.71	0	0	1502.01	0	0	0	0	0	0	1895.68	0	0	71264.9	223.011	833.157	338.517	37.7703
M4	3743.26	13123.5	3047.93	413.928	181.279	343.041	584.781	422.768	198.408	54.759	718.318	0	3267.77	469.588	1291.8	1489.47	0	387.593	0	26097.6	634.33	77.2178	194.014	5619.54	402.445	412.353	12328.3	4523.89	866.34	13.3076	7692.24	32.0858	2062.38	3947.63	10.822	5.86081	1217.53	863.67	0	0	77.0373	0	330.762	0	378.31	0	1436.58	89.2475	509.316
M4	4828.39	15163.6	3185.32	245.072	80.4486	567.428	481.982	609.733	188.701	0	1249.78	522.493	167.369	236.403	0	12115.2	0	0	0	28760.9	18037	6506.41	9194.44	11930.9	2053.69	11162.9	2549.73	4736.09	440.232	2725.3	777.935	0	775.498	0	0	14.8319	0	0	0	0	0	0	84.6996	0	24926.6	0	1006.5	868.911	1186.3
SD4	1872.47	4547.2	901.179	778.086	366.359	234.31	1103.09	782.192	952.361	180.913	1027.75	0	1187.74	365.783	532.978	793.881	42.9637	208.636	41.1217	6131.45	67.6338	33.7215	74.0626	755.133	123.23	138.868	2155.35	433.947	92.3536	15.7089	986.149	16.5024	133.14	452.057	0	0	0	0	0	0	0	0	168.328	73.5351	110.876	3.55683	462.324	148.472	46.8814
SD4	2302.88	5910.88	1380.24	878.16	438.52	346.97	1240.94	914.269	1092	287.381	1590.41	0	1807.7	437.262	447.994	40.7677	43.3138	186.707	0	2801.07	55.2865	27.4216	20.8104	87.6881	37.4966	99.4717	942.273	80.9401	28.8464	197.134	332.345	21.4793	123.457	0	5.78176	3.30283	0	0	0	0	0	0	66.8074	409.575	129.551	0.0141235	294.208	145.518	0
SD4	4571.25	11525.8	2057.7	1712.32	1178.77	543.769	2003.21	1642.22	2187.61	335.128	2546.29	0	2585.49	852.311	835.634	2946.59	0	427.533	0	13383.3	446.995	16.1774	9.19835	2861.17	143.194	168.053	3774.1	1389.63	11.6609	227.446	1975.85	48.637	273.107	546.864	0	0	106.742	0	0	0	0	0	214.615	71.934	298.609	2.62903	1280.23	408.234	147.282
SD4	2926.41	7137.57	1403.07	1059.2	547.807	302.969	1427.83	1221.41	1295.38	270.804	1609.8	0	2343.45	541.296	966.424	1603.8	115.907	379.434	49.9892	13725.1	306.502	71.3567	68.867	2821.22	245.488	464.921	4970.81	1689.24	142.548	19.0989	2670.98	36.0832	767.017	1055.7	7.2004	0	0	0	0	0	0	0	176.922	0	309.772	1.76728	797.426	403.699	119.255
SD4	1804.06	4873.16	909.385	601.286	451.603	230.714	911.149	704.993	647.002	322.609	1004.4	632.571	904.53	94.8691	124.078	10559.2	0	20.8066	0	13059.6	10718.5	6990.26	7402.07	4641.75	3593.55	5003.88	862.156	1514.84	1062.29	1543.93	115.138	11.4625	0	53.1851	0	0	0	0	0	0	0	0	63.6722	0	19597.7	169.642	388.553	84.6868	605.366
SD4	3095.72	7141.34	1690.96	1040.3	545.021	404.898	1624.3	1233.73	1633.68	402.492	1769.8	78.7138	822.47	457.983	116.183	3457.07	0	47.1828	0	6471.84	623.582	39.4571	158.28	1406.72	59.9054	300.883	1107.72	423.885	29.114	58.1687	95.6715	0	0	66.7879	0	0	0	0	0	0	0	0	122.331	0	1322.32	1.09931	410.3	269.754	50.0754
SD4	2878.42	6724.69	1408.76	1401.75	825.338	374.571	1761.1	1013.48	1539.77	502.917	2127.25	0	1967.04	784.362	1141.24	941.333	562.921	605.088	0	16655.3	85.0335	44.7118	82.3438	2055.74	403.419	301.635	7659.81	1331.84	531.862	23.6432	5004.98	51.0125	743.702	2233.4	0	0	692.11	0	0	0	0	0	276.454	0	129.266	0	956.234	405.286	179.427
Ben4	6916.49	10506.3	2825.44	2573.34	377.179	500.182	1002.44	1058.89	671.376	159.285	2240.01	889.25	361.2	117.456	0	17898.4	0	0	0	21915.2	23476.2	19028.7	18539.9	8132.25	12218	9699.26	935.033	2370.09	2890.43	2224.48	121.343	145.658	0	80.1902	99.3873	55.1487	0	0	0	0	0	0	0	0	39505	96.8415	900.582	189.667	676.382
Ben4	2649.56	4425.36	1037.85	1022.68	203.048	255.084	371.659	216.81	517.941	135.531	908.754	414.685	54.7004	0	0	9429.95	0	0	0	10164.9	11430.8	10426.9	9281.94	3099.56	7459.13	3979.68	85.4469	806.897	2079.17	930.488	0	271.488	0	32.1256	72.2799	0	0	0	0	0	0	101.226	27.1988	0	19298.1	91.9796	473.765	238.97	49.3658
Ben4	2923.24	5237.22	1297.7	899.206	315.191	245.236	538.532	424.507	502.969	218.122	1252.98	341.231	988.05	151.406	112.596	7070.82	13.328	25.0763	0	14131.1	7528.43	2927.28	3441.55	5076.91	579.804	4196.91	1248.33	2175.79	660.969	1132.62	432.086	0.366146	324.692	0	8.76391	12.7697	0	0	0	0	0	0	0	0	10619.3	132.599	317.3	72.5201	999.258
Ben4	2470.89	4548.87	1058.28	926.628	305.481	219.309	925.658	642.908	788.952	125.195	892.088	575.508	25.9726	64.9773	0	9819.18	0	0	0	9418.39	9490.37	7756.01	7007.64	2919.84	5119.8	3735.44	217.678	738.507	1313.97	933.002	25.5927	83.8957	0	0	0	0	0	0	0	0	0	0	0	0	21588.8	214.665	1371.51	566.677	51.4695
Ben4	2420.09	4573.31	1108.15	881.61	394.395	240.795	805.51	624.05	894.836	199.831	1058.98	13.3934	663.375	250.456	329.7	2013.28	0	63.4033	0	10768.1	1168.39	44.9373	87.6798	3467.93	127.659	1083.28	2976.91	2022.87	364.925	377.706	1362.77	2.0578	645.936	499.388	9.39833	0	111.211	154.659	124.323	0	0	0	147.734	26.0406	1361.66	1.075	332.661	47.8711	321.77
Ben4	2121.64	4108.44	1086.38	686.17	391.276	202.324	843.611	501.863	734.399	141.027	732.871	571.409	296.798	30.5443	54.499	9100.87	26.759	0	0	6591.43	7152.86	8286.8	5816.99	2169.25	5878.51	2174.12	83.7779	580.709	1367.05	299.121	31.6342	179.505	0.288463	0	104.793	0	0	0	0	0	0	0	2.08933	0	20274.6	178.055	873.337	651.015	31.8287
Ben4	2940.88	5696.5	1328.67	858.911	499.426	231.141	1151.06	768.162	1013.16	150.919	1093.8	591.555	603.668	113.431	103.797	10733.7	0	11.9761	0	15987.6	13575.7	7549.64	9116.39	6120	4348.95	6961.88	973.443	1975.76	1639.54	2693.48	129.15	0	0.576852	60.9091	10.4324	183.182	0	0	0	137.644	0	0	19.7334	0	22191	182.992	441.072	79.2754	442.152
M6	1974.95	3966.5	364.353	1241.32	218.911	356.811	380.182	79.8183	50.3742	289.459	2660.46	416.673	937.209	197.469	109.344	10017.3	0	56.6039	0	15039.5	8766.93	5617.21	4993.95	5006.93	2748.9	4084.49	1271.12	1422.81	907.241	687.466	251.24	0	0	0	11.4343	0	0	0	0	61.5989	0	0	58.5203	0	17135.1	35.2082	821.671	261.346	1253.17
M6	1585.3	3715.21	160.829	1529.69	215.599	397.033	532.887	67.4325	0	613.326	3882.74	0	2794.67	527.906	1444.91	2157.37	718.657	504.607	0	12802.2	524.116	55.7552	102.93	2395.97	122.633	260.552	3427.94	1179.14	6.46919	173.787	1594.66	0	570.805	359.426	0	0	0	0	0.548909	0	0	0	257.174	0	626.517	0.239006	539.233	449.731	6.64904
M6	1244.61	2997.38	131.41	1178.39	96.814	406.006	343.427	63.6924	0	450.335	2572.7	69.723	1178.58	46.3747	485.936	7664.07	0	27.307	0	19321.1	9477.96	2945.41	4680.97	7750.13	981.076	6155.27	2762.77	3811.3	799.618	1552.11	1016.89	0	393.118	41.8563	46.3723	0	0	0	227.872	0	0	0	42.3398	0	12896.7	62.6512	383.721	20.3832	1291.25
M6	1688.54	3271.98	297.848	1290.22	410.094	474.117	632.335	85.4223	30.2144	923.589	3591.88	0	2974.95	586.789	1594.03	1192.35	244.539	383.783	61.3698	10024.5	169.833	51.1002	53.1539	1236.13	151.6	305.811	3448.86	951.318	84.7396	11.8161	1503.28	0	523.214	848.178	0	0	0	0	0	0	0	0	138.041	0	108.16	0.190744	507.199	395.66	3.05702
M6	904.26	1954.97	159.36	949.422	104.653	297.468	437.564	135.927	40.3783	271.785	1570.96	345.497	120.512	0	0	10770.7	0	0	0	10828.2	11692.3	11460.9	9668.58	4008.32	8315.89	4258.09	541.187	1337.75	2589.49	835.695	48.5889	159.2	0	34.926	0	21.8594	0	0	0	109.764	8.29163	0	0	0	24774.5	101.877	339.58	152.901	52.4315
M6	1961.85	4389.64	209.472	1925.25	172.55	440.901	695.835	238.32	70.8083	585.861	4377.55	0	2685.55	567.536	1244.2	3401.83	0	383.715	0	12899	876.194	36.9813	134.748	3086.49	137.759	721.907	3192.49	1513.47	171.768	12.4767	1223.91	0	410.144	386.496	0	0	71.006	0	0	0	0	0	112.637	0	718.36	0	566.546	371.457	242.948
M6	1982.67	3927.19	51.1557	1729.37	299.672	479.324	470.885	60.8566	37.0536	847.956	4147.91	0	4037.01	486.009	1228.92	503.549	194.101	108.627	0	5156.58	199.326	163.319	125.79	394.326	97.1901	652.369	1866.67	902.931	93.8111	188.763	825.123	0	118.909	201.266	37.9676	0	0	0	0	0	0	0	149.119	175.603	319.61	6.44743	788.902	0	10.197
SD6	823.32	1179.77	51.319	722.023	292.179	203.513	713.823	35.303	0	1006.02	2075.42	233.64	557.696	76.3585	18.6506	8427.59	0	30.4618	0	11006.2	6615.19	4117.14	4156.48	3473.24	2078.1	3117.26	795.905	1353.15	760.441	912.174	102.788	4.48519	115.187	0	36.6231	16.4746	0	0	16.395	0	0	0	39.7197	0	13516.8	97.1072	163.135	269.871	1193.21
SD6	499.295	1029.66	34.9898	479.564	258.476	161.107	409.954	45.201	38.4054	546.658	1313.46	183.424	209.24	65.0709	0	5942.38	0	0	33.5419	6167.07	4539.67	3735.33	3236.25	2149.15	2119.61	2070.55	429.218	663.555	471.973	485.488	76.2553	0	0	0	5.54221	0	0	0	0	0	0	10.4259	20.2339	0	11017.9	98.1621	119.224	61.0194	472.034
SD6	1002.24	1833.48	33.757	1015.8	611.2	359.723	1180.12	71.8299	29.961	1238.23	3135.74	117.874	1165.08	282.8	212.416	5758.9	0	114.072	64.4089	6972.36	1692.85	788.04	504.378	1820.39	146.381	910.692	806.975	624.137	14.2616	168.258	166.309	0	61.7912	0	0	0	0	2.81127	44.8035	0	0	0	31.1775	0	4132.85	31.6731	309.11	166.793	118.729
SD6	846.842	1464.28	61.8068	861.545	239.952	244.394	850.915	119.812	41.2215	859.41	1761.83	559.773	498.278	29.0333	87.3607	13962.1	52.0181	0	0	6523.26	7360.03	14647.7	6770.53	2520.87	11865.7	2305.71	62.9374	222.445	2575.52	137.673	21.2529	766.582	0	0	221.358	0	0	0	0	30.0628	0	349.052	21.9332	0	31522.1	218.984	882.023	596.472	36.1162
SD6	2064.27	3136.42	67.1672	1626.86	646.786	653.016	1558.02	100.596	130.023	1722.93	4537.42	61.2676	2396.96	589.648	552.059	6932.73	0	300.957	0	17586.6	3393.06	385.287	798.941	5074.91	235.262	2491.9	3231.91	2242.06	102.186	406.191	1074.7	0	759.988	0	46.0295	0	0	0	0	0	0	0	140.686	0	4635.47	21.5085	910.837	341.375	510.959
SD6	1544.63	2664.73	142.275	1391.28	624.811	457.868	1182.67	44.9006	37.2589	941.95	3626.61	0	2476.11	455.056	1135.42	651.558	431.055	306.849	0	5923.69	75.7831	0	18.4564	566.042	101.252	106.229	2127.82	408.915	181.009	26.1448	989.531	37.2563	4.06673	350.743	0	1.35046	0	0	0	0	0	0	138.526	0	58.2064	1.40323	560.575	206.855	0
SD6	752.43	1665.09	147.418	743.607	319.052	241.924	685.52	102.054	91.2395	790.043	1583.14	312.958	18.679	13.1721	0	13342.1	0	0	0	9017.95	10344.2	11258.1	8503.53	3052.59	8642.1	3280.42	217.651	986.547	2716.86	674.79	36.9464	345.202	0	0	67.5856	0	0	0	0	0	0	126.225	0	0	28438.5	201.978	1497.89	918.443	8.31895
Ben6	1484.71	3029.54	253.391	1105.68	120.566	331.363	257.404	152.59	0	615.711	2395.4	163.554	1001.37	152.903	363.074	7654.2	0	84.3797	0	17815.3	7957.33	2502.17	3659.49	6265.73	934.808	4768.26	2329.7	2920.8	813.614	1165.85	766.898	3.59374	362.182	97.8654	42.2993	134.221	41.9552	14.9718	0	0	0	0	110.584	0	11739.4	39.4701	893.319	275.486	1348.86
Ben6	1642.13	2917.48	219.779	1069.03	199.432	343.653	639.991	118.465	23.0769	597.486	2419.06	309.745	0	0	0	17692.9	0	0	0	17724	18814.3	17573.6	16021.3	6728.37	12861.1	7295.91	883.868	1982.59	3682.53	2124.55	0	573.912	0	0	211.9	0	0	0	0	0	0	279.898	37.4965	0	42427	204.101	924.169	431.874	0
Ben6	926.627	2581.51	116.943	1060.21	94.4421	274.071	311.79	71.1978	103.736	538.141	1951.18	426.014	38.9961	66.4196	0	15710.3	0	0	0	13131.6	14735.9	16693.6	12919.2	4911.78	12285.4	4975.3	262.398	935.533	3734.68	1128.47	59.0613	523	0	0	59.5888	0	0	0	0	0	0	116.812	0	0	38199.9	135.616	1274.91	566.216	13.4192
Ben6	656.216	1665.92	16.9991	690.899	194.214	182.284	345.644	88.6187	0	630.621	1751.83	286.766	50.2137	75.5346	0	11062.6	0	0	0	11586.7	12422.8	10030.4	9450.73	4354.68	6901.88	5249.77	612.665	1293.69	2453.83	1211.01	0	98.1064	0	0	48.5694	0	0	0	0	123.546	0	0	0	0	24620.9	186.379	821.292	611.109	30.7302
Ben6	1045.8	2152.77	0	824.903	248.336	337.92	354.568	104.328	0	657.236	1959.19	434.914	0	60.0628	0	14374	0	0	0	11787	13330.7	14986.2	11456	4333.92	11356.3	4764.93	308.935	1157.07	3032.72	784.292	0	337.94	0	0	60.7914	52.5273	0	0	0	0	0	137.917	0	0	32875.2	188.573	404.674	322.844	15.325
Ben6	1013.26	2456.32	46.4111	989.636	562.988	386.616	836.595	147.365	32.1822	1232.92	2481.98	555.594	63.825	89.1219	0	21097.7	0	0	0	9972.05	11933.3	23140.8	11947.7	4792.16	19585.4	4294.57	225.609	168.859	4077.94	115.247	49.8179	1298.4	0	0	387.729	42.5986	0	0	0	0	0	1002.64	0	0	49483.7	270.635	400.166	116.66	128.301
Ben6	1092.99	2366.98	36.8556	800.911	236.159	387.661	472.483	78.1592	23.3088	576.184	2108.76	544.459	637.896	0	0	14802.7	0	0	16.4669	13287.5	13984.7	14635.6	11769.2	4666.39	10652.4	5440.92	572.073	1311.6	4324.29	1099.98	166.836	158.588	0	38.899	14.5103	29.749	0	0	0	0	0	110.703	0	0	32992.3	273.808	727.542	235.879	165.443
[truncated: 5,000 more columns]

## Sheet: pos
C	1709.3	7375.15	2097.2	1801.51	0	74.2598	0	3.39623	0.921768	144.74	5.16296	1016.66	0	0	0	74.0891	0	0	2179.7	1.72105	26424.5	33482	3503.83	7491.12	6161.94	3232.21	3557.29	321.831	1144.78	589.427	916.166	583.523	135.17	21.6253	1493.69	609.953	0	534.911	79.7954	452.126	5388.26	1695.79	435.603	3014.66	30.0136	0.453535	54610.9	7455.07	7525.12
C	4264.85	17415.2	8510.56	10513.9	81.3466	2493.06	2.3842	0.306875	0.0966997	2252.33	51.8779	1421.55	21.9132	5.65384	118.664	352.439	85.8111	0	3448.64	10.3671	21055.5	110061	2512.59	20772.6	19990.2	2447.35	8633.97	1701.37	3020.8	293.85	1412.12	942.456	63.1349	49.7631	3387.65	2491.89	0	1295.3	427.26	103.621	8238.83	2660.16	1059.41	6044.09	7.39088	2.78084	103246	6935.62	12785.6
C	3528.6	15266.6	7533.84	9973.24	0	3226.71	0.0898234	0	3.37114	2184.69	32.4287	1100.49	18.2713	10.2718	156.617	481.553	13.099	15.5001	5176.29	3.25695	18580.6	133469	2323.79	22255.5	23407.2	2202.25	10369.8	1335.14	3724.66	397.316	1556.17	1543.92	44.6857	24.88	1880.13	896.647	0	684.652	299.716	88.6932	2680.05	3876.97	2032.64	10509.8	28.7095	19.9063	167235	12072.7	28900.8
C	4968.23	25737.1	9663.57	15641.3	0	4228.01	0.602003	0	0	3934.78	88.0622	1993.94	21.8014	29.5583	280.446	768.027	0	29.4699	7313.43	9.66667	35681.9	168637	4298.34	25490.3	32786.6	3958.33	11963.4	1118.82	4898.06	422.252	2869.52	2235.72	95.1554	46.6008	1742.67	905.57	0	322.26	558.285	1407.18	2077.77	4902.37	1682.84	11887.2	61.6074	2.2735	214947	30503.4	65972.8
C	2806.41	20186.7	5307.84	9149.8	116.886	1665.76	1.40637	0.0133294	4.45508	2021.86	29.1699	1803.83	16.9631	0.580063	141.52	450.605	55.9184	0	4399.81	0	34753.1	77271.3	4112.28	14385.6	16432.8	3164.29	5913.71	767.538	2236.6	311.378	697.78	1006.59	62.9488	41.1313	1068.13	268.354	0	162.968	479.718	128.609	973.11	2750.32	870.364	7900.65	45.0842	2.99044	133507	13331.5	26421.1
C	1025.26	9730.73	1784.42	3378.83	0	426.163	0.407822	0	38.0767	712.805	14.3958	1060.53	5.44668	6.35795	103.19	272.482	36.0132	0	1943.13	0	18936	25810.6	2465.05	5499.26	5024.95	1757.35	1719.49	378.435	646.426	148.143	298.458	448.305	20.921	20.7057	453.436	166.388	0	60.6195	187.147	49.2998	585.215	1808.91	606.704	3502.47	6.9936	2.08466	65780.4	3170.56	5279.68
C	1410.87	15441.3	2584.03	4671.48	23.3594	416.563	6.89024	2.94813	137.444	1137.64	29.7826	1765.93	10.9564	8.9563	209.254	293.23	88.0491	0	2511.61	3.50528	30671.1	32592.2	4235.63	7425.23	7273.1	2793.66	2616.02	680.661	995.122	355.698	710.059	756.805	142.292	87.2365	1196.13	764.509	6.81009	451.34	355.397	416.982	1128.44	2200.04	728.788	3041.12	15.8387	1.27588	86916	16682.7	21855.7
M2	3622.27	41638.7	5269.62	10013.2	71.3599	457.615	1.82472	0	586.302	1979.38	63.2706	4589.94	39.1592	57.2387	692.494	537.029	136.882	22.4613	6109.19	21.7377	86664.3	73585.3	11509.3	17517.4	16164.3	7707.61	5578.08	2021.8	2232	1010.64	1665.31	2043.66	618.486	376.851	2942.75	1616.22	0	1174.53	1059.42	1063.33	1435.24	4062.95	1669.89	6151.51	110.984	50.6081	189497	47060.2	61097.2
M2	3380.74	38614.7	3820.65	7184.93	0	332.825	11.0017	0.0412416	1073.24	869.565	108.685	4562.09	7.70444	73.0098	304.119	586.478	63.8499	41.296	4200.89	27.0082	83830.8	49973	11106.7	13101.3	9491.58	6984.83	3369.11	1731.86	1925.87	777.034	451.788	1044.58	573.266	661.833	1585.05	849.126	11.9183	514.847	1174.92	45.7343	971.865	3940.3	996.516	4663.11	90.397	6.45108	148568	32789.9	32263.5
M2	1571.12	15885.7	1644.27	2797.27	0	76.5191	12.9202	0	481.075	317.995	54.0887	2033.35	217.086	55.0152	197.127	289.683	43.3539	12.054	1619.25	12.4092	35196.9	18990	4988.32	5434.18	3393.43	2843.22	1535.29	684.209	1270.44	375.945	299.864	341.771	269.746	364.53	434.793	225.384	0	223.794	577.74	86.0926	988.635	1677.15	523.356	1521.8	59.7128	14.2832	69071.5	17153.8	18199.9
M2	2873.9	26982.9	2636.07	4595.61	0	123.805	47.3054	41.985	1017.43	708.504	74.5733	3607.77	568.876	79.7205	305.681	412.45	129.721	32.4894	2260.6	95.0629	93384	29334.4	9565.19	9137.2	6106.08	4637.51	2956.26	1355.18	2830.07	704.437	426.751	795.404	1010.68	925.721	379.206	411.636	21.9119	387.316	1060.7	71.3482	4781.05	1557.26	418.061	682.656	524.237	14.0762	58426.7	42716.1	43919.9
M2	3422.38	30112	3480.24	4447.42	0	160.819	72.6219	0.58151	1424.32	427.693	97.9906	4659.68	870.994	112.006	472.426	462.674	254.877	35.0503	2584.91	207.71	111925	33460.8	13590.9	12744	6521.16	5402.58	3078.77	1824.31	3957.28	1095.2	1148.44	629.135	1504.15	1178.45	392.426	264.107	52.8192	377.593	1424.75	636.267	785.123	3215.3	835.476	2477.42	470.06	10.9763	157988	42349.6	34937.2
M2	4512.55	31285.6	4055.2	4303.25	6.19863	210.104	170.527	35.2748	1398.16	399.953	109.072	5401.65	1366.63	101.474	558.388	578.81	347.195	224.492	2949.14	314.883	112899	36295.7	16615.9	14470.8	6572.01	5798.59	3075.7	2030.81	5017.15	1272.09	739.05	194.89	1823.58	1565.98	91.0689	144.754	91.1102	331.444	1727	108.095	1827.33	3397.27	736.526	2904.54	31.6067	10.8033	164020	30698.4	28773.8
M2	4565.57	32041.1	4244.48	3949.68	5.34709	208.521	108.029	143.468	1423.84	221.986	99.0523	5466.66	1206.54	119.071	265.485	464.074	426.527	366.173	2509.01	328.252	113663	36642.9	18101.7	16530	7476.07	5722.06	3438.27	2309.89	5512.58	1427.34	1046.15	97.0163	1936.46	1502.04	55.434	152.101	134.052	255.709	1865.33	197.471	1334.34	3651.21	737.902	3423.9	48.914	0	195755	26733.8	19334.2
SD2	23343.6	41903.3	21058.2	2035.55	0	952.762	242.543	216.906	765.458	19.8361	605.604	21786.5	31.6098	266.569	0	0	108.007	34.9001	0	5602.57	95960.8	74120.3	173978	132597	13968.2	11034.7	7306.38	10521.6	8403.87	10477.8	10963.5	0	7666.08	5760.7	0	150.851	714.69	411.27	5360.86	2645.4	3495.01	8534.34	2035.6	3116.54	412.344	0.0926133	317453	128253	144481
SD2	25739	49353.3	24636	2433.59	0	965.673	374.44	9.27053	631.62	0	555.278	22868.2	10.1411	238.74	0	0	100.363	24.6352	43.8498	5634.06	108457	91373.8	169017	172565	19094.7	12932.8	8634.06	12288.5	9097.14	10560.3	15787.5	0	8110.8	5838.43	0	186.782	795.414	201.581	5631.96	6924.52	3631.66	10525.7	3327.16	4923.85	85.8533	7.72475	479210	131179	127310
SD2	26509.1	42928.2	23274.7	2039.74	0	797.635	97.7538	323.683	368.507	0	401.692	21962.2	0.378359	283.275	0	0	24.8742	0	0	6082.43	100597	85482.2	171375	157574	15762.2	12378.8	7512.67	11737.4	7488.64	11788.5	15836.1	0	8224.3	5285.69	6.78587	175.666	597.721	374.356	5442.91	7552.35	5145.47	17412.8	3476.97	10011.5	53.7489	0	637988	116838	115393
SD2	31793.6	43986.2	27349	2172.34	0	1830.17	368.336	28.182	344.06	0	634.281	24377.8	0	263.642	0	0	0	0	0	7314.92	110432	101416	206305	241262	18795.7	13967.9	11572.9	16004.6	7573.75	14338.5	17289.2	0	9213.76	5806.9	0	215.61	766.658	254.732	6037.6	4024.07	5620.74	21229.2	5443.73	14620.6	32.0061	8.13256	884975	139237	111835
SD2	21155.7	33063.8	19271.9	1528.28	0	1066.47	115.688	7.15349	305.905	0	441.716	17138.6	0	132.186	0	0	0	0	0	5246.87	79994.9	68997.9	133806	131276	13275.1	9847.67	7038.59	9888.48	5841.34	10433.3	14757.8	0	6315.75	4462.72	0	203.531	604.485	363.976	4765.88	10002	6962.48	17681.9	3815.26	9763.25	31.4003	15.6174	655569	25464.7	15877.8
SD2	28882.9	49028.9	23576.1	2034.61	0	821.455	156.084	113.489	326.391	0	445.082	20615.6	0	129.796	0	16.2472	0	0	0	5729.63	108457	101706	169836	202947	22748.6	13969.8	9350.3	12301.2	9246.33	12709.9	14567.9	0	8325.17	4444.03	0	250.21	641.832	416.754	6677.48	2930.98	5647.51	17283.5	7422.34	18832.5	89.4912	0.73394	737019	116735	124210
SD2	34187.6	52377.3	27777.5	3037.38	0	781.268	166.918	64.8508	374.622	0	433.124	23830	0	132.187	0	0	71.4585	0	0	7370.51	123944	112867	186525	204754	24087	16311.4	11227.3	14337.3	8826.81	13643.5	16831.6	0	9276.04	6046.92	0	360.023	931.595	419.439	7087.56	3975.12	2885.7	12192.8	4629.19	3850.03	5316.99	54.4327	518118	310101	318453
Ben3	12608.8	62092.9	12987.5	6973.28	0	455.794	749.747	0.163742	2416.4	64.8023	372.382	14033.9	2227.99	199.113	82.5658	491.63	893.644	823.289	4746.62	1283.89	256354	107250	51639	50217.1	12817.3	13079.4	8911.2	6315.98	10399.3	4092.99	4569.98	41.6677	4731.69	3956.6	17.2761	343.568	263.498	515.347	3950.57	2896.72	4054.42	8555.85	2969.98	6314.85	1894.59	18.3977	368569	93188.3	90451.3
Ben3	7968.47	35900.7	8027.63	3658.63	0	359.619	567.231	21.3381	1596.2	67.0429	210.876	9037.55	1123.69	192.049	84.773	264.362	767.469	494.647	2006.74	1013.26	145761	52151.5	35079.8	31747.9	6731.28	7533.94	4958.46	4471.72	7119.43	2696.54	2129.76	0	3218.78	2709.87	23.4993	135.958	209.11	303.41	2649.81	415.203	3898.38	5172.97	1282.2	3809.82	1.06713	15.5498	230031	41643.7	34852.6
Ben3	12095.5	48915.7	12228.4	4121.36	0	459.292	844.73	211.433	1555.28	72.0751	319.594	13807.4	811.36	186.084	27.2477	286.829	618.433	360.739	2197.2	1677.54	207385	78237.2	53674.5	50808.4	11306.7	10488.4	7316.71	6109.72	9771.1	4225.83	3276.38	0	4521.34	3342.72	30.7014	189.61	382.16	534.079	3993.87	594.703	3027.61	9687.32	2185.94	9435.98	36.3841	34.9422	456106	65213.3	58762.4
Ben3	11301.5	45730.9	11969.7	4357.02	0	471.657	739.132	113.062	1579.63	142.941	347.443	12832.7	460.586	171.167	19.7125	178.61	768.093	298.433	1826.57	1396.25	184665	74636	51830.2	50917.7	11662.2	10010.4	7337.43	5864.93	8429.06	4272.45	5248.61	0	3912.56	3168.64	11.0884	208.086	403.25	434.625	3846.88	2771.59	3214.26	8660.35	2551.21	6445.18	32.4376	33.8401	394441	64144.2	56209.6
Ben3	12913.6	46464.7	14031.2	4046.07	5.90483	565.382	694.404	73.5469	1358.56	68.5322	351.372	13958.3	608.389	219.027	24.5552	89.3407	450.515	204.909	1359.75	1717.82	168513	77416.2	59444.8	59674.8	12472.3	10247	7323.81	7843.46	9120.29	5070.15	6228.23	0	4485.56	3325.15	23.5275	241.658	419.491	225.935	4063.34	4835.61	2807.09	8747.65	2780.37	6050.49	127.635	19.0782	419603	75086.3	71921.8
Ben3	14160.4	44428.8	15234.4	2442.49	0	558.256	736.875	28.946	1946.55	17.4727	466.651	18069.8	65.8219	247.418	0	18.5597	332.842	141.056	93.8237	3469.83	109181	64813.9	86159.1	71368	8617.42	10580.7	6687.91	7842.18	10506	6968.42	8105.56	0	6250.65	5054.97	0	156.821	722.022	429.271	5219.5	4346.38	4837.48	11821.1	3090.25	7148.99	22.5921	0.769611	427046	68605.3	35286.1
Ben3	22308.7	66731.7	24041.4	5192.45	0	843.414	1130.99	41.6026	1686.95	154.357	637.411	23994.4	194.405	332.84	69.2505	0	366.085	213.339	445.279	3846.67	230761	117419	115434	115931	18549	15724.8	11093.1	11458.9	13052.3	9160.36	12987.4	0	8311.99	5967.36	0	320.471	753.311	589.063	7006.93	5037.04	3088.55	11653.4	3782.95	5564.16	46.3849	21.6957	407157	128804	140199
M4	4274.23	52953.6	7026.02	13190.3	0	747.541	12.8248	0	526.122	3097.53	131.019	4953.12	12.159	130.616	279.071	1164.26	71.0643	0	8384.15	8.41725	96941.4	94348.5	14689.3	22586.4	22150.1	8747.96	7153.12	1975.59	2730.65	945.175	907.139	3479.64	509.79	186.687	3495.49	1545.31	0	1709.93	1226.46	97.5419	10952.1	632.69	93.0345	424.206	133.111	0	11030.5	6529.05	23368.8
M4	2958.51	35102.3	4195.2	8113.74	0	291.633	8.63459	0	280.412	1775.22	57.5425	3418.85	3.33715	69.4178	326.075	721.351	23.8221	55.1089	4890.62	4.2649	65840.7	55995.6	10064.4	14622.7	12521.9	5998.81	4074.63	1164.14	1251.82	542.966	482.959	1665.94	198.132	117.911	1898.46	532.053	0	871.463	857.182	54.1074	5691.77	99.9875	15.5895	141.594	90.5084	0	2659.34	2918.4	12383.8
M4	2444.62	30612.4	2894.35	5881.34	0	62.3956	6.49708	13.6295	427.35	931.015	65.4821	2880.25	35.8932	52.806	120.656	523.313	82.8548	17.0533	3609.98	4.24707	58099.1	40944.7	8177.71	10920	8973.3	5313.08	2711.84	1051.34	1260.95	362.154	390.916	1375.14	128.422	272.326	901.955	420.824	0	503.825	876.34	52.5897	3173.89	160.115	6.28101	125.804	75.5505	2.06038	1466.61	2679.79	9843.21
M4	2926.43	29367.1	3102.62	5400.85	0	110.209	6.09255	40.3874	412.551	443.692	33.9273	3163.53	275.338	79.4417	140.787	569.985	33.492	49.562	3466.65	19.7886	55097.1	38490.6	9314.63	11021.6	8569.24	5056.32	3078.91	1236.19	1793.22	535.106	413.074	1100.02	181.4	548.584	702.607	305.537	0	543.624	989.73	35.2423	6538.62	387.464	42.4251	273.612	94.0649	31.4423	6560.82	24492.8	54149.8
M4	3852.62	34091.4	4066.4	5584.77	11.2297	133.814	29.9268	2.88639	871.371	292.832	123.003	4142.3	746.161	96.7502	53.3535	673.523	71.8466	22.6446	3683.57	29.8636	63197.7	42814.3	13322.7	15117.9	9639.66	5730.24	3735.94	1650.28	3268.53	1197.33	1446.56	963.958	494.909	827.023	527.57	348.925	0	457.611	1666.1	1178.16	6212.3	4947.86	1238.23	4374.11	50.6021	23.7981	181254	9051.05	9376.46
M4	5486.87	42225.7	5212.98	5686.27	0	156.939	19.2658	133.605	924.057	366.223	129.139	5592.38	1022.58	146.997	112.531	924.544	61.1726	138.372	4219.04	94.8995	78383.6	50894.3	19164.6	19716.5	11049.2	7124.44	4358.79	2018.92	4614.68	999.733	893.793	504.357	1027.21	1291.94	103.651	233.748	38.0736	394.353	2426.63	140.878	6327.13	697.283	167.907	330.503	370.346	51.246	27863.8	46691.6	72324.8
M4	8451.41	60388	8580.23	7709.1	0	283.397	152.45	22.5354	1321.82	210.861	195.523	8754.52	1230.45	251.614	364.43	956.279	185.896	207.983	5931.69	117.174	110749	74767.7	30496.5	31497.3	16515.5	10067.9	6515.97	4012.21	7973.33	1897.34	1687	87.5108	2221.3	2252.2	0	186.983	111.788	386.513	3387.36	115.207	14206.1	5165.49	1481.98	1730.84	64.5349	32.1603	176599	42533.6	49111.5
SD4	40207.8	46294.2	36505.4	2368.59	0	2681.62	400.717	0.155254	401.104	0	993.009	25219.5	0	154.449	0	0	0	0	0	6424.34	110821	125800	198318	401428	22711.3	13887.9	11791	16171.5	6476.76	14515.4	23255.1	0	8700.17	6121.81	3.65915	203.417	426.745	446.267	5980.26	5047.31	4318.58	2857.49	480.05	1590.61	818.433	59.4016	40438.1	56995.6	238201
SD4	49346.8	50410.2	44477.5	2595.22	0	2474.71	150.005	20.5199	280.152	0	794.582	30135.1	0	86.3958	0	0	0	0	0	8156.89	134143	153558	251122	468490	24292	17775.6	14130.5	17994.2	7840.87	17676.4	28292	0	10421.2	7284.6	0	316.405	546.787	645.389	7530.19	6331.33	8153.87	4398.28	343.949	3526.26	235.672	0	17696	34012.1	222702
SD4	62520.6	65826.6	58839.1	3371.21	0	3174.99	296.276	24.7821	586.245	0	1377.5	36688.1	0	195.985	0	0	0	0	0	9776.85	168188	188954	313070	504143	32631.5	20979.8	17547.1	23563.4	11083.7	22499	35347.9	0	13446.2	7738.01	0	327.674	887.653	626.27	9520.65	7766.02	4719.99	4485.77	215.719	2804.52	140.395	58.3793	53340.5	49004.6	272839
SD4	50824.2	54047.1	45550.4	2282.95	0	3384.49	138.225	22.3515	386.207	3.9321	952.622	31409.1	0	163.438	0	0	0	0	0	9491.53	134294	144341	261745	385510	23450.6	16226.5	14810.9	20818.2	8214.66	19120.8	27645.4	0	11821.2	8219.32	51.0654	294.695	859.891	467.982	7434.37	7128.13	4170.25	3627.94	338.368	1772.62	131.141	65.4779	66646	92008	280974
SD4	37571.1	39425.8	34366.2	2047.44	0	2080.17	159.52	9.18769	284.207	0	732.844	22012.1	0	75.1311	0	0	0	0	0	5845.41	96185.7	116767	178412	321987	20420.2	12751.7	10729.1	15016.6	5849.09	14456.7	21947.5	0	7722.55	5480.67	0	159.396	413.186	513.16	5335.15	5063.02	4341.1	11379.2	4259.89	7150.91	45.4891	0	373549	64246.2	114750
SD4	50211.3	51271.6	47793.2	3096.76	0	2659.58	280.687	0	338.299	11.6358	662.065	27986.4	0	115.37	0	0	42.3915	0	0	7098.2	127893	165529	237096	501649	26820.9	16758.2	14303.4	19306.4	6878.84	17259.6	30688	0	9894.33	6228.3	0	219.14	368.738	227.239	7736.64	6621.43	10594.7	14885.1	3443.59	4520.43	295.319	0	168164	32632.5	138562
SD4	53987.6	48983.2	48454.7	4173.32	0	3270.13	171.048	48.0985	288.836	0	1138.41	28685.9	0	152.133	0	0	57.172	0	0	8398.78	138830	154909	245634	470935	24570.8	16142.8	14874.4	18748	7426.57	17331.8	29166.1	0	10690.3	6924.62	0	181.356	621.109	362.97	6840.56	7078.55	8566.84	6444.46	522.629	1386.45	6932.24	119.207	44139.4	129850	381695
Ben4	13219	65277.2	14619.1	6702.41	0	795.235	437.31	33.5212	1111.41	283.568	451.799	11932.2	1572.74	222.693	0	693.284	801.845	685.198	3732.84	1147.65	153187	97505	51481.2	60648.4	24800.5	10246	8514.6	7038.19	9417.59	3520.39	4437.1	40.6378	3946.22	2619.26	26.6399	221.689	271.221	337.547	4295.39	860.391	3519.11	5834.68	1084.79	4642.91	149.232	6.51679	268140	52388.1	61808.9
Ben4	16134.8	63864.9	17890.7	5207.25	0	1006	560.636	13.7594	966.318	324.012	390.393	13205.5	612.593	128.916	0	314.446	210.635	525.609	2314.59	1164.73	121087	101542	62086.7	80989.9	28123.3	10288.6	9547.54	7676.73	9696.23	4525.85	6248.61	0	3663.94	2597.19	0	232.833	175.903	249.452	4680.04	839.853	4013.86	6624.43	2349.92	2068.86	154.607	81.7693	207870	74097.3	128517
Ben4	16228.9	57624.6	19436.9	4968.01	0	980.117	814.307	4.78504	744.223	211.807	582.806	13808.7	438.841	190.828	9.88407	147.088	454.189	318.922	1499.2	1395.46	125202	109497	64527.4	82301.4	24392.2	9798.77	9511.46	7360.88	8626.02	4992.6	5874.01	0	3851.32	2526.26	29.0188	193.545	369.11	245.824	4292.84	941.852	3198.09	12029.2	4000.89	7240.14	35.7415	43.0528	475672	95129.7	104505
Ben4	17034.7	55682.7	19530.5	4898.13	0	1304.32	613.455	15.6722	797.808	236.993	675.001	14226.8	150.523	199.693	19.7315	170.062	469.71	309.2	651.003	1672.51	102183	95893.3	72250.9	92197.3	23906.8	10530.1	8994.66	7598.76	8863.84	5305.94	6903.84	0	4183.63	2618.15	22.6647	172.784	264.754	322.606	4421.12	1173.42	2834.24	3500.79	2000.7	1042.06	697.242	47.6072	106884	100233	199641
Ben4	17088.3	47047.1	19903.8	2925.81	0	1197.02	734.031	33.1926	603.546	82.4034	517.042	14021.3	46.0641	159.067	0	64.1018	384.75	27.423	208.495	1965.62	91031	87445.5	75686.3	97191.4	22252.4	9427.14	8645.12	8048.83	7133.5	6002.14	9736.22	0	4088.08	2945.85	0	164.108	291.125	172.213	4644.64	3378.81	3027.74	9734.22	4090.02	8343.99	66.925	45.246	462556	69399	75260.8
Ben4	25941.4	64131.7	29871.3	3591.56	0	1921.97	933.031	4.11913	707.399	88.3557	919.922	21612.1	41.5174	323.016	0	0	337.716	142.436	74.7564	3646.96	119384	118778	121809	162088	28535.4	13725.5	11698.6	11951.8	9791.97	9170.39	15695.7	0	6485.29	4237.74	0	343.265	669.543	305.954	6906.72	6841.15	5732	15322.4	4945.7	6677.68	75.4515	56.0747	525029	122526	158222
Ben4	35401.3	79686	38569.7	4017.92	0	2360.11	1288.65	46.1515	991.368	0	1123.13	28277.5	6.06058	432.701	0	0	299.223	46.2195	0	5219.49	149710	147332	168729	237992	35783.1	16805.5	14873.9	16586.3	10871.9	12907.5	21634.8	0	8777.21	6139.72	0	231.353	871.086	413.377	7904.52	8626.84	2319.51	12614.8	4712.75	5505.04	114.384	11.9531	495162	122683	190457
M6	10677.8	65345.1	11971.6	7058.17	0	459.362	42.9563	0	1677.16	189.809	453.664	11921.6	1294.15	280.769	73.4336	434.966	58.5848	0	5433.42	0	136897	100053	26757.2	36140.5	12963.5	12374.9	5976.54	2481.96	6796.36	938.506	1433.58	0	1571.17	2023.58	0	100.594	0	58.5619	3491.83	300.073	1708.61	2300.28	1049.51	1990.5	70.747	132.584	111231	22719.4	45422.5
M6	12343.9	71868.7	13203.1	7860.94	0	338.46	27.2925	0	2255.33	113.97	413.284	13352.2	786.546	241.752	208.768	278.166	277.571	65.903	4447.29	46.5412	142811	105814	29477.8	38181.2	14664	12562.4	6701.82	2102.19	8208	1024.19	1556.81	56.8455	2265.21	1935.41	0	59.3373	40.8967	56.8776	3743.44	182.491	3864.11	480.425	188.467	335.313	145.795	0	21474.6	25490.3	77829.6
M6	9959.49	58509.4	11447.1	5837.13	0	85.4192	43.4311	0.0567593	1589.99	162.88	473.161	10827	950.79	230.006	0	536.999	360.659	43.8608	3647.91	87.8956	115200	87567.9	26398.5	32887.8	12880.5	10427	5718.81	2203.77	7333.27	641.647	1475.93	39.2479	1337.03	2015.76	0	51.0718	104.396	57.9346	3341.18	221.129	990.887	900.472	460	1319.21	124.507	53.4277	82450.7	33380.8	51108
M6	12033.2	72518.4	14087.1	7831.44	0	409.413	60.6207	0	2077.19	333.299	562.179	13259.7	1012.02	353.205	77.5152	688.58	147.119	0	3447.8	163.851	141810	105530	33270.1	41703.1	16163	12956.3	6620.93	2905.41	8944.08	1470.58	1747.12	0	2566.25	1952.07	0	98.367	72.3637	33.9179	4043.35	241.207	6468.15	997.831	134.747	153.344	175.426	0	14348.7	23728.1	89964.9
M6	9617.44	54038.1	11353.2	4560.42	0	324.95	10.062	0	1452.55	46.4289	498.265	10871.1	565.181	208.585	0	102.685	460.278	62.2212	1441.53	44.5372	102087	74854.8	28024.5	34077.5	11372.4	9506.38	4517.6	2421.56	7479.93	1214.17	1460.2	54.0326	2362.79	1968.65	0	48.226	122.515	18.9242	2940.85	413.07	3364.85	6204.77	2462.05	3007.73	135.151	132.619	212737	25498.2	34481.8
M6	18621.8	103305	21951.3	10000.8	0	630.805	234.147	0	3550.11	103.209	1017.06	21636.6	848.461	482.727	0	671.481	490.513	101.691	1899.11	276.121	200467	141232	57366.4	67805	22142.4	18619.9	9547.39	4976.8	13207.1	2845.16	4114.82	0	5072.03	3891.92	0	166.879	37.6182	0	6237	720.534	16143.1	3118.45	96.2902	689.134	239.183	0.00474466	35610.1	29173.7	125440
M6	17036.2	97947.6	20706.7	6923.99	0	430.424	139.658	0	2341.59	0	783.195	20519.7	599.369	488.529	166.739	358.405	74.9716	83.6817	2236.03	265.415	196935	139835	58829.1	66751.6	20340.2	18403.4	8792.31	5500.39	13599.2	2812.77	3457.88	0	5109.85	3950.95	0	164.204	124.602	0	6088.7	656.018	6205.96	763.231	111.314	208.473	168.713	22.5677	10272.1	16518.8	53654.1
SD6	13846	67325.9	15957	4745.71	0	654.894	198.733	2.18678	1449.86	250.78	548.839	17090.3	24.095	220.837	0	27.1358	460.539	82.2571	322.426	1427.55	117220	79471.2	56208.6	56333.6	19467.6	11264.6	6496.33	5159.6	11991.5	3765.33	3289.8	0	5328.44	3463.26	14.7386	119.304	314.779	109.036	5355.49	789.433	3361.45	2538.93	852.345	2140.99	45.7199	115.751	117741	29550.1	45268.3
SD6	15008.5	79820.2	17241.3	6303.88	0	838.343	239.896	7.26459	1844.85	164.031	669.871	20825.1	72.1834	268.832	0	5.34965	155.2	31.2954	199.644	1303.33	135903	87291.1	64683.4	63811.2	21781.4	12820.5	7183.75	5861.59	13791.6	4547.01	3891.92	0	6095.63	4033.68	0	176.026	264.245	251.037	6437.53	913.116	2061.69	1211.94	397.272	1436.86	100.821	170.124	62323.8	17407.5	38681.8
SD6	9211.27	49154.1	10284	2741.34	0	452.473	90.5351	6.74066	1084.9	85.3979	355.328	11744.9	14.8336	153.237	0	0	62.5571	31.1729	109.452	801.1	84936.3	51727.8	39943.4	38204.7	13260.9	7764.1	4309.43	3493.44	8662.8	2706.96	2353.29	0	3873.65	2324.34	0	89.3973	90.0182	163.063	4134.59	642.313	3399.95	6480.43	2547.68	1586.58	38.8862	35.6987	212016	30631.5	57121
SD6	21831.9	131569	25664.7	9712.63	0	1378.46	219.284	5.10917	2790.22	413.485	1136.09	30627.7	84.1728	494.353	0	109.001	348.918	104.794	0	2065.56	219720	137949	99061.3	94099.4	36537.4	20870.5	9560.3	9126.23	22509.2	6841.29	6201.06	0	9174.89	6281.54	0	230.318	221.141	255.649	10135.6	1466.25	12922	7592.56	1783.06	1665.21	159.822	211.204	141683	17246.2	43749.3
SD6	22501.2	119213	24268.2	8588.5	0	1287.84	182.314	27.1186	2558.41	378.729	896.869	28187.7	110.983	399.822	56.1738	0	437.951	67.5737	109.004	2393.8	205107	119947	94099.5	87849.9	31331.9	18457.5	8778.19	8836.58	20212	6103.55	4828.94	0	8960.64	6375.09	0	164.876	316.263	250.147	9442.92	1247.88	10486.5	4682.84	467.98	1194.95	72.8904	112.718	67975.7	38166.5	80573
SD6	17617.9	89981.2	18295.2	5703.27	0	663.842	61.8773	7.30592	1961.75	223.761	660.943	21063.4	62.2253	323.175	42.3789	0	244.384	0	89.1299	2150.71	159648	93389.4	74231.5	66407.8	21268	14502.8	6598.75	6333.14	15410.3	4702.73	3297.92	0	6678.32	4551.16	0	164.021	238.411	252.949	7219.46	1152.19	6121.19	1725.91	118.884	349.123	54.5657	0	11894.4	22527.4	44182.7
SD6	19829.4	104057	21649.8	7178.41	0	817.598	191.639	5.02062	2517.04	215.228	841.625	24486.2	26.5884	254.968	0	0	66.7648	54.3371	154.352	1463.14	180203	107765	78723.6	73372.2	24820.5	16211.1	6438.94	6677.56	17835.8	4578.19	4242.44	0	7622.13	5032.66	0	206.495	154.724	235.5	7747.9	1158.88	9765.53	3321.29	143.064	399.724	157.605	57.3037	14492	25195	121711
Ben6	12478.5	65712.5	15058.4	4542.12	0	452.402	74.0839	0	1937.58	80.6144	620.455	14515.6	622.523	287.719	0	0	0	0	751.11	162.206	126779	91609.3	43107.9	50103.9	14626.3	11503.5	5958.05	3857.1	9355.74	2272.56	2903.01	0	3348.07	2630.4	0	64.3256	0	0	4442.24	355.117	1188.06	7731.69	2902.79	3310.59	81.6851	97.185	313394	36012.8	48849.3
Ben6	10849.7	57238.5	13213.7	3675.58	0	201.124	78.7946	0	1468.58	139.189	492.412	12618.6	190.997	194.971	64.8199	0.418948	42.9636	0	65.5888	327.962	106138	74991.9	38132.9	43809.9	12664.1	10160	4885.49	3167.88	7922.54	2024.78	2529.25	0	3364.41	2456.64	0	93.1153	0	79.523	3957.51	562.689	1443.97	6898.22	3014.95	3288.29	57.2303	124.287	281062	28221.5	36436.6
Ben6	11287.5	54843.8	12255.1	3904.23	0	520.157	54.318	1.211	1674.89	127.39	686.443	12450.4	312.495	154.501	85.2643	8.33759	287.45	137.027	220.312	410.958	97428.3	69350.1	36017.5	40675.1	12742.8	8598.99	5223.51	3430.43	7403.57	2154.79	2635.89	0	3244.64	2292.38	0	91.5524	78.1464	113.946	3446.11	498.636	2257.2	6682.39	2927.9	2890.77	15.5749	115.393	297775	53115.2	71046.9
Ben6	12235.8	60502	14080.3	4681.57	0	517.269	282.557	0.114356	1796.85	203.464	657.185	14208	301.636	272.943	0	57.214	197.233	0	86.9305	539.284	109283	75040.3	43722.4	46686.2	14503.4	9971.46	5725.98	4129.6	9242.99	2602.04	2949.3	0	3807.11	2752.81	0	53.1918	186.848	194.881	3770	822.026	1018.79	9230.82	2380.77	7243.8	15.004	81.358	368881	40866.5	42757.2
Ben6	13453	75018.3	16603.2	5392.92	0	726.334	377.218	0.00143036	1556.19	80.574	724.215	16429.8	66.8077	293.659	29.8126	0	182.926	0	437.201	1279.13	126654	89149	55650.3	58875.1	21659.5	11773.4	6893.41	5326.5	12558	4108.25	3961.53	0	4508.54	3296.57	0	162.001	77.1627	142.038	5715.91	817.088	1444.79	11885	4915.29	9226.25	72.1361	106.559	546362	23177.1	31264.6
Ben6	13852.6	68179.2	16609.7	5393.45	0	816.586	192.918	2.12959	1860.27	316.632	733.071	16295.8	99.7824	252.835	0	14.0833	357.628	152.415	103.918	633.646	121574	84630.6	53870.1	57941.2	19634.5	10788.9	6734.52	5661.33	11422.4	3576.22	4004.96	0	4610.29	3480.51	0	147.302	140.954	102.886	5031.16	1549.71	2591.48	9564.43	3235.92	4547.67	160.826	40.3454	427795	58233.5	67563.2
Ben6	12553.5	59549.1	14766.5	3581.95	0	658.1	148.604	3.51832	1788.92	65.4722	633.946	14868.2	149.542	251.727	28.3905	0	165.792	40.2746	0	1119.43	112560	73965.3	50277.5	52567.4	14761.1	9807.62	5075.61	4093.06	11170.9	3040.91	2696.14	0	4144.37	3251.03	0	91.2819	66.1205	150.253	4379.88	710.659	2308.75	1798.85	484.302	1617.52	54.795	270.28	83673.2	13616.4	25967.2
[truncated: 4,054 more columns]
