# Supplementary material for: Exploring the mechanism of Shendi Bushen capsule in anti-renal fibrosis using metabolomics theory and network analysis
Source: Royal Society of Chemistry journal article supplement (doi:10.1039/d2mo00141a), 2022-08-15
Supplement: d2mo00141a5.xlsx [file d2mo00141a5.xlsx]

## Sheet: Sheet1
C	M	SD	Ben
58.7849	98.5152	68.266	71.8779
52.9157	87.2282	69.169	75.0382
59.2364	90.84	65.1057	63.2997
55.6246	96.2578	62.8483	72.7808
61.0423	93.0974	69.169	57.882
54.2701	101.675	66.4601	64.6542
56.5275	66.9116	58.3335	75.4897
57.882	85.4223	61.0423	66.9116
61.0423	87.2282	70.5234	78.1986
66.0086	82.7134	66.9116	59.2364
