# Supplementary material for: Exploring the mechanism of Shendi Bushen capsule in anti-renal fibrosis using metabolomics theory and network analysis
Source: Royal Society of Chemistry journal article supplement (doi:10.1039/d2mo00141a), 2022-08-15
Supplement: d2mo00141a6.xlsx [file d2mo00141a6.xlsx]

## Sheet: Sheet1
	Total Cmpd	Hits	Raw p	#NAME?	Holm adjust	FDR	Impact
One carbon pool by folate	9	1	1.2882e-07	15.865	3.4782e-06	3.4782e-06	0.17486	5,10-Methenyltetrahydrofolic acid
Amino sugar and nucleotide sugar metabolism	88	2	8.4618e-07	13.983	2.2001e-05	1.1423e-05	0.06961	Malonic semialdehyde，Glucosamine 6-phosphate
Fructose and mannose metabolism	48	1	1.0752e-05	11.44	0.00026879	9.6764e-05	0.05129	Mannose 6-phosphate
Glyoxylate and dicarboxylate metabolism	50	2	7.4858e-05	9.4999	0.0017966	0.00050529	0.14161	5,10-Methenyltetrahydrofolic acid, Oxalic acid
Vitamin B6 metabolism	32	3	0.0002379	8.3437	0.0054716	0.0012846	0.15141	O-Phospho-4-hydroxy-L-threonine, 4-Pyridoxic acid, Isopyridoxal
Histidine metabolism	44	3	0.042524	3.1577	0.63785	0.088318	0.06211	D-Erythro-imidazole-glycerol-phosphate, L-Glutamic acid, Formiminoglutamic acid
beta-Alanine metabolism	28	1	0.063968	2.7494	0.89556	0.10795	0.16607	Malonic semialdehyde
Propanoate metabolism	35	1	0.063968	2.7494	0.89556	0.10795	0.09805	Malonic semialdehyde
Alanine, aspartate and glutamate metabolism	24	4	0.13498	2.0026	1	0.21101	0.17664	N-Acetyl-L-aspartic acid, Argininosuccinic acid, L-Glutamic acid, Glucosamine 6-phosphate
