# Supplementary material for: Exploring the mechanism of Shendi Bushen capsule in anti-renal fibrosis using metabolomics theory and network analysis
Source: Royal Society of Chemistry journal article supplement (doi:10.1039/d2mo00141a), 2022-08-15
Supplement: d2mo00141a7.xlsx [file d2mo00141a7.xlsx]

## Sheet: out.path
KEGG_A_class	KEGG_B_class	Pathway	out (185)	All (8312)	Pvalue	Qvalue	Pathway ID	Genes	K_IDs
Metabolism	Global and overview maps	Metabolic pathways	91	1554	1.91941e-21	5.22079e-19	ko01100	ENSG00000133116;ENSG00000036473;ENSG00000160200;ENSG00000136750;ENSG00000182621;ENSG00000121691;ENSG00000100031;ENSG00000100983;ENSG00000160282;ENSG00000086205;ENSG00000126522;ENSG00000177000;ENSG00000135069;ENSG00000008394;ENSG00000093010;ENSG00000146701;ENSG00000148834;ENSG00000120053;ENSG00000173599;ENSG00000182199;ENSG00000160211;ENSG00000166123;ENSG00000013375;ENSG00000065154;ENSG00000070669…	K14756+K00611+K01697+K01580+K05858+K03781+K18592+K21456+K13990+K14592+K01755+K00297+K00831+K00799+K00545+K00026+K00799+K14454+K01958+K00600+K00036+K00814+K01836+K00819+K01953+K13241+K11204+K00318+K01930+K00799+K11351+K00020+K00016+K00457+K01189+K21418+K10251+K00167+K00164+K00693+K01476+K11205+K08048+K00814+K01468+K00287+K01047+K00799+K00501+K00139+K13240+K13242+K01476+K00682+K18246+K00166+K00382+…
Metabolism	Amino acid metabolism	Arginine biosynthesis	15	24	1.01136e-19	1.37546e-17	ko00220	ENSG00000036473;ENSG00000126522;ENSG00000120053;ENSG00000166123;ENSG00000007171;ENSG00000118520;ENSG00000167701;ENSG00000089250;ENSG00000164867;ENSG00000081181;ENSG00000130707;ENSG00000148672;ENSG00000115419;ENSG00000135821;ENSG00000161653	K00611+K01755+K14454+K00814+K13241+K01476+K00814+K13240+K13242+K01476+K01940+K00261+K01425+K01915+K11067
Metabolism	Global and overview maps	Biosynthesis of amino acids	21	79	1.53618e-17	1.39281e-15	ko01230	ENSG00000036473;ENSG00000160200;ENSG00000126522;ENSG00000135069;ENSG00000120053;ENSG00000173599;ENSG00000182199;ENSG00000166123;ENSG00000070669;ENSG00000118520;ENSG00000167701;ENSG00000081181;ENSG00000059573;ENSG00000130707;ENSG00000198650;ENSG00000182054;ENSG00000111640;ENSG00000135821;ENSG00000062485;ENSG00000161653;ENSG00000092621	K00611+K01697+K01755+K00831+K14454+K01958+K00600+K00814+K01953+K01476+K00814+K01476+K12657+K01940+K00815+K00031+K00134+K01915+K01647+K11067+K00058
Metabolism	Amino acid metabolism	Alanine, aspartate and glutamate metabolism	15	40	2.28093e-15	1.55103e-13	ko00250	ENSG00000136750;ENSG00000086205;ENSG00000126522;ENSG00000120053;ENSG00000166123;ENSG00000070669;ENSG00000167701;ENSG00000112294;ENSG00000130707;ENSG00000148672;ENSG00000128683;ENSG00000115419;ENSG00000135821;ENSG00000108381;ENSG00000198380	K01580+K14592+K01755+K14454+K00814+K01953+K00814+K00139+K01940+K00261+K01580+K01425+K01915+K01437+K00820
Metabolism	Global and overview maps	Carbon metabolism	20	123	2.18953e-12	1.1911e-10	ko01200	ENSG00000121691;ENSG00000177000;ENSG00000135069;ENSG00000146701;ENSG00000120053;ENSG00000173599;ENSG00000182199;ENSG00000160211;ENSG00000166123;ENSG00000105953;ENSG00000167701;ENSG00000091140;ENSG00000148672;ENSG00000182054;ENSG00000111640;ENSG00000062485;ENSG00000014641;ENSG00000117118;ENSG00000092621;ENSG00000091483	K03781+K00297+K00831+K00026+K14454+K01958+K00600+K00036+K00814+K00164+K00814+K00382+K00261+K00031+K00134+K01647+K00025+K00235+K00058+K01679
Metabolism	Amino acid metabolism	Cysteine and methionine metabolism	13	53	8.33924e-11	3.78046e-09	ko00270	ENSG00000160200;ENSG00000100983;ENSG00000135069;ENSG00000146701;ENSG00000120053;ENSG00000001084;ENSG00000134333;ENSG00000023909;ENSG00000111716;ENSG00000198650;ENSG00000014641;ENSG00000092621;ENSG00000166800	K01697+K21456+K00831+K00026+K14454+K11204+K00016+K11205+K00016+K00815+K00025+K00058+K00016
Metabolism	Metabolism of other amino acids	Glutathione metabolism	13	61	5.57071e-10	2.16462e-08	ko00480	ENSG00000100031;ENSG00000100983;ENSG00000008394;ENSG00000148834;ENSG00000160211;ENSG00000001084;ENSG00000065621;ENSG00000023909;ENSG00000134184;ENSG00000006625;ENSG00000166825;ENSG00000182054;ENSG00000084207	K18592+K21456+K00799+K00799+K00036+K11204+K00799+K11205+K00799+K00682+K11140+K00031+K23790
Human Diseases	Drug resistance	Platinum drug resistance	14	75	7.65844e-10	2.3697e-08	ko01524	ENSG00000171791;ENSG00000008394;ENSG00000148834;ENSG00000171552;ENSG00000172115;ENSG00000132906;ENSG00000065621;ENSG00000134184;ENSG00000087088;ENSG00000142208;ENSG00000164305;ENSG00000141510;ENSG00000089685;ENSG00000084207	K02161+K00799+K00799+K04570+K08738+K04399+K00799+K00799+K02159+K04456+K02187+K04451+K08731+K23790
Human Diseases	Endocrine and metabolic diseases	AGE-RAGE signaling pathway in diabetic complications	16	103	7.84091e-10	2.3697e-08	ko04933	ENSG00000182621;ENSG00000171791;ENSG00000087245;ENSG00000119699;ENSG00000164867;ENSG00000087088;ENSG00000142208;ENSG00000149782;ENSG00000164305;ENSG00000092969;ENSG00000136244;ENSG00000109320;ENSG00000120738;ENSG00000111276;ENSG00000174775;ENSG00000177606	K05858+K02161+K01398+K13377+K13242+K02159+K04456+K05858+K02187+K13376+K05405+K02580+K09203+K06624+K02833+K04448
Human Diseases	Cancers	Pathways in cancer	36	552	3.32793e-09	9.05196e-08	ko05200	ENSG00000182621;ENSG00000170345;ENSG00000171791;ENSG00000008394;ENSG00000198668;ENSG00000148834;ENSG00000171552;ENSG00000172115;ENSG00000087245;ENSG00000180210;ENSG00000007171;ENSG00000132906;ENSG00000065621;ENSG00000119699;ENSG00000155897;ENSG00000134184;ENSG00000087088;ENSG00000017427;ENSG00000148660;ENSG00000142208;ENSG00000149782;ENSG00000164305;ENSG00000141510;ENSG00000077782;ENSG00000092969…	K05858+K04379+K02161+K00799+K02183+K00799+K04570+K08738+K01398+K01313+K13241+K04399+K00799+K13377+K08048+K00799+K02159+K05459+K04515+K04456+K05858+K02187+K04451+K04362+K13376+K05405+K02580+K09455+K04513+K08731+K23790+K07299+K06624+K02833+K04448+K01679
Human Diseases	Cancers	Colorectal cancer	14	94	1.64526e-08	4.06828e-07	ko05210	ENSG00000170345;ENSG00000171791;ENSG00000172115;ENSG00000132906;ENSG00000119699;ENSG00000087088;ENSG00000142208;ENSG00000164305;ENSG00000141510;ENSG00000092969;ENSG00000067560;ENSG00000089685;ENSG00000174775;ENSG00000177606	K04379+K02161+K08738+K04399+K13377+K02159+K04456+K02187+K04451+K13376+K04513+K08731+K02833+K04448
Metabolism	Carbohydrate metabolism	Citrate cycle (TCA cycle)	9	32	1.99045e-08	4.51168e-07	ko00020	ENSG00000146701;ENSG00000173599;ENSG00000105953;ENSG00000091140;ENSG00000182054;ENSG00000062485;ENSG00000014641;ENSG00000117118;ENSG00000091483	K00026+K01958+K00164+K00382+K00031+K01647+K00025+K00235+K01679
Human Diseases	Neurodegenerative diseases	Amyotrophic lateral sclerosis (ALS)	11	58	4.51855e-08	9.45419e-07	ko05014	ENSG00000142168;ENSG00000121691;ENSG00000171791;ENSG00000171552;ENSG00000172115;ENSG00000132906;ENSG00000089250;ENSG00000087088;ENSG00000164305;ENSG00000141510;ENSG00000273079	K04565+K03781+K02161+K04570+K08738+K04399+K13240+K02159+K02187+K04451+K05210
Human Diseases	Cardiovascular diseases	Fluid shear stress and atherosclerosis	16	142	8.88602e-08	1.64211e-06	ko05418	ENSG00000170345;ENSG00000171791;ENSG00000008394;ENSG00000198668;ENSG00000148834;ENSG00000087245;ENSG00000065621;ENSG00000134184;ENSG00000164867;ENSG00000142208;ENSG00000130707;ENSG00000141510;ENSG00000109320;ENSG00000067560;ENSG00000084207;ENSG00000177606	K04379+K02161+K00799+K02183+K00799+K01398+K00799+K00799+K13242+K04456+K01940+K04451+K02580+K04513+K23790+K04448
Human Diseases	Substance dependence	Cocaine addiction	10	49	9.05576e-08	1.64211e-06	ko05030	ENSG00000176697;ENSG00000149295;ENSG00000180176;ENSG00000164885;ENSG00000118260;ENSG00000109320;ENSG00000198822;ENSG00000273079;ENSG00000132535;ENSG00000177606	K04355+K04145+K00501+K02090+K05870+K02580+K04606+K05210+K11828+K04448
Environmental Information Processing	Signal transduction	cAMP signaling pathway	20	223	9.9382e-08	1.68949e-06	ko04024	ENSG00000122585;ENSG00000128271;ENSG00000170345;ENSG00000198668;ENSG00000169676;ENSG00000176697;ENSG00000001626;ENSG00000149295;ENSG00000155897;ENSG00000135312;ENSG00000157005;ENSG00000178394;ENSG00000148660;ENSG00000142208;ENSG00000118260;ENSG00000109320;ENSG00000067560;ENSG00000273079;ENSG00000115263;ENSG00000177606	K05232+K04266+K04379+K02183+K05840+K04355+K05031+K04145+K08048+K04153+K05237+K04153+K04515+K04456+K05870+K02580+K04513+K05210+K05259+K04448
Environmental Information Processing	Signal transduction	HIF-1 signaling pathway	14	121	4.2273e-07	6.74588e-06	ko04066	ENSG00000171791;ENSG00000007171;ENSG00000134333;ENSG00000164867;ENSG00000017427;ENSG00000148660;ENSG00000142208;ENSG00000111716;ENSG00000136244;ENSG00000111640;ENSG00000109320;ENSG00000166800;ENSG00000117394;ENSG00000111276	K02161+K13241+K00016+K13242+K05459+K04515+K04456+K00016+K05405+K00134+K02580+K00016+K07299+K06624
Cellular Processes	Cell growth and death	Apoptosis - multiple species	8	33	4.46419e-07	6.74588e-06	ko04215	ENSG00000171791;ENSG00000171552;ENSG00000172115;ENSG00000132906;ENSG00000064300;ENSG00000087088;ENSG00000164305;ENSG00000089685	K02161+K04570+K08738+K04399+K02583+K02159+K02187+K08731
Cellular Processes	Cell growth and death	Apoptosis	15	142	5.34278e-07	7.64861e-06	ko04210	ENSG00000170345;ENSG00000171791;ENSG00000171552;ENSG00000172115;ENSG00000156709;ENSG00000132906;ENSG00000087088;ENSG00000142208;ENSG00000164305;ENSG00000141510;ENSG00000109320;ENSG00000089685;ENSG00000174775;ENSG00000177606;ENSG00000134259	K04379+K02161+K04570+K08738+K04727+K04399+K02159+K04456+K02187+K04451+K02580+K08731+K02833+K04448+K02582
Organismal Systems	Nervous system	Neurotrophin signaling pathway	14	126	6.98264e-07	9.49639e-06	ko04722	ENSG00000171791;ENSG00000198668;ENSG00000176697;ENSG00000064300;ENSG00000134243;ENSG00000087088;ENSG00000148660;ENSG00000142208;ENSG00000141510;ENSG00000109320;ENSG00000067560;ENSG00000174775;ENSG00000177606;ENSG00000134259	K02161+K02183+K04355+K02583+K12388+K02159+K04515+K04456+K04451+K02580+K04513+K02833+K04448+K02582
Human Diseases	Infectious diseases	Hepatitis B	16	167	8.38156e-07	1.06513e-05	ko05161	ENSG00000170345;ENSG00000171791;ENSG00000172115;ENSG00000132906;ENSG00000119699;ENSG00000087088;ENSG00000142208;ENSG00000164305;ENSG00000141510;ENSG00000092969;ENSG00000136244;ENSG00000118260;ENSG00000109320;ENSG00000089685;ENSG00000174775;ENSG00000177606	K04379+K02161+K08738+K04399+K13377+K02159+K04456+K02187+K04451+K13376+K05405+K05870+K02580+K08731+K02833+K04448
Environmental Information Processing	Signaling molecules and interaction	Neuroactive ligand-receptor interaction	24	352	8.61502e-07	1.06513e-05	ko04080	ENSG00000122585;ENSG00000172179;ENSG00000128271;ENSG00000169676;ENSG00000147437;ENSG00000101200;ENSG00000006128;ENSG00000188822;ENSG00000180210;ENSG00000133636;ENSG00000174697;ENSG00000149295;ENSG00000115353;ENSG00000135312;ENSG00000113580;ENSG00000157005;ENSG00000178394;ENSG00000198822;ENSG00000187848;ENSG00000161610;ENSG00000273079;ENSG00000115263;ENSG00000168959;ENSG00000196689	K05232+K05439+K04266+K05840+K05252+K05242+K05239+K04278+K01313+K05235+K05424+K04145+K04222+K04153+K05771+K05237+K04153+K04606+K05216+K05246+K05210+K05259+K04604+K05222
Metabolism	Amino acid metabolism	Arginine and proline metabolism	9	52	1.77832e-06	2.10305e-05	ko00330	ENSG00000120053;ENSG00000065154;ENSG00000007171;ENSG00000100033;ENSG00000118520;ENSG00000089250;ENSG00000164867;ENSG00000081181;ENSG00000059573	K14454+K00819+K13241+K00318+K01476+K13240+K13242+K01476+K12657
Metabolism	Global and overview maps	2-Oxocarboxylic acid metabolism	6	19	2.39011e-06	2.70879e-05	ko01210	ENSG00000120053;ENSG00000166123;ENSG00000167701;ENSG00000182054;ENSG00000062485;ENSG00000161653	K14454+K00814+K00814+K00031+K01647+K11067
Metabolism	Carbohydrate metabolism	Pyruvate metabolism	8	41	2.63794e-06	2.87008e-05	ko00620	ENSG00000146701;ENSG00000173599;ENSG00000134333;ENSG00000091140;ENSG00000111716;ENSG00000014641;ENSG00000166800;ENSG00000091483	K00026+K01958+K00016+K00382+K00016+K00025+K00016+K01679
Human Diseases	Drug resistance	Antifolate resistance	7	31	4.04113e-06	4.22764e-05	ko01523	ENSG00000177000;ENSG00000182199;ENSG00000136877;ENSG00000228716;ENSG00000137563;ENSG00000136244;ENSG00000109320	K00297+K00600+K01930+K00287+K01307+K05405+K02580
Human Diseases	Cancers	Central carbon metabolism in cancer	10	74	4.88857e-06	4.79166e-05	ko05230	ENSG00000160211;ENSG00000134333;ENSG00000142208;ENSG00000141510;ENSG00000077782;ENSG00000111716;ENSG00000115419;ENSG00000166800;ENSG00000117394;ENSG00000174775	K00036+K00016+K04456+K04451+K04362+K00016+K01425+K00016+K07299+K02833
Organismal Systems	Endocrine system	Glucagon signaling pathway	12	109	4.93259e-06	4.79166e-05	ko04922	ENSG00000182621;ENSG00000198668;ENSG00000134333;ENSG00000104812;ENSG00000148660;ENSG00000142208;ENSG00000149782;ENSG00000111716;ENSG00000118260;ENSG00000166800;ENSG00000117394;ENSG00000115263	K05858+K02183+K00016+K00693+K04515+K04456+K05858+K00016+K05870+K00016+K07299+K05259
Human Diseases	Infectious diseases	Measles	14	150	5.69098e-06	5.33775e-05	ko05162	ENSG00000170345;ENSG00000171791;ENSG00000171552;ENSG00000172115;ENSG00000132906;ENSG00000147065;ENSG00000087088;ENSG00000142208;ENSG00000164305;ENSG00000141510;ENSG00000136244;ENSG00000109320;ENSG00000111276;ENSG00000177606	K04379+K02161+K04570+K08738+K04399+K05763+K02159+K04456+K02187+K04451+K05405+K02580+K06624+K04448
Metabolism	Carbohydrate metabolism	Glyoxylate and dicarboxylate metabolism	7	33	6.32259e-06	5.73248e-05	ko00630	ENSG00000121691;ENSG00000146701;ENSG00000182199;ENSG00000091140;ENSG00000135821;ENSG00000062485;ENSG00000014641	K03781+K00026+K00600+K00382+K01915+K01647+K00025
Human Diseases	Cancers	Small cell lung cancer	11	94	6.82701e-06	5.99015e-05	ko05222	ENSG00000171791;ENSG00000171552;ENSG00000172115;ENSG00000007171;ENSG00000132906;ENSG00000087088;ENSG00000142208;ENSG00000164305;ENSG00000141510;ENSG00000109320;ENSG00000111276	K02161+K04570+K08738+K13241+K04399+K02159+K04456+K02187+K04451+K02580+K06624
Organismal Systems	Endocrine system	Relaxin signaling pathway	13	135	8.81393e-06	7.49184e-05	ko04926	ENSG00000182621;ENSG00000170345;ENSG00000087245;ENSG00000007171;ENSG00000155897;ENSG00000089250;ENSG00000164867;ENSG00000142208;ENSG00000149782;ENSG00000118260;ENSG00000109320;ENSG00000174775;ENSG00000177606	K05858+K04379+K01398+K13241+K08048+K13240+K13242+K04456+K05858+K05870+K02580+K02833+K04448
Organismal Systems	Endocrine system	Oxytocin signaling pathway	14	159	1.12028e-05	9.2338e-05	ko04921	ENSG00000182621;ENSG00000170345;ENSG00000167658;ENSG00000198668;ENSG00000153956;ENSG00000155897;ENSG00000164867;ENSG00000004468;ENSG00000148660;ENSG00000149782;ENSG00000134072;ENSG00000067560;ENSG00000174775;ENSG00000177606	K05858+K04379+K03234+K02183+K04858+K08048+K13242+K01242+K04515+K05858+K08794+K04513+K02833+K04448
Human Diseases	Cancers	Prostate cancer	11	103	1.6574e-05	0.000132592	ko05215	ENSG00000171791;ENSG00000132906;ENSG00000017427;ENSG00000142208;ENSG00000141510;ENSG00000077782;ENSG00000118260;ENSG00000109320;ENSG00000084207;ENSG00000111276;ENSG00000174775	K02161+K04399+K05459+K04456+K04451+K04362+K05870+K02580+K23790+K06624+K02833
Human Diseases	Drug resistance	Endocrine resistance	11	104	1.81797e-05	0.000141283	ko01522	ENSG00000170345;ENSG00000171791;ENSG00000087245;ENSG00000155897;ENSG00000087088;ENSG00000017427;ENSG00000142208;ENSG00000141510;ENSG00000111276;ENSG00000174775;ENSG00000177606	K04379+K02161+K01398+K08048+K02159+K05459+K04456+K04451+K06624+K02833+K04448
Organismal Systems	Endocrine system	GnRH signaling pathway	10	94	4.18688e-05	0.000316342	ko04912	ENSG00000182621;ENSG00000198668;ENSG00000147437;ENSG00000087245;ENSG00000155897;ENSG00000148660;ENSG00000149782;ENSG00000120738;ENSG00000174775;ENSG00000177606	K05858+K02183+K05252+K01398+K08048+K04515+K05858+K09203+K02833+K04448
Organismal Systems	Aging	Longevity regulating pathway - mammal	10	95	4.59036e-05	0.000337453	ko04211	ENSG00000133116;ENSG00000121691;ENSG00000155897;ENSG00000087088;ENSG00000017427;ENSG00000142208;ENSG00000141510;ENSG00000118260;ENSG00000109320;ENSG00000174775	K14756+K03781+K08048+K02159+K05459+K04456+K04451+K05870+K02580+K02833
Organismal Systems	Nervous system	Dopaminergic synapse	12	138	5.46442e-05	0.000391137	ko04728	ENSG00000182621;ENSG00000170345;ENSG00000198668;ENSG00000093010;ENSG00000169676;ENSG00000149295;ENSG00000180176;ENSG00000148660;ENSG00000142208;ENSG00000149782;ENSG00000118260;ENSG00000273079	K05858+K04379+K02183+K00545+K05840+K04145+K00501+K04515+K04456+K05858+K05870+K05210
Human Diseases	Cancers	Chronic myeloid leukemia	9	79	5.93261e-05	0.00040472	ko05220	ENSG00000171552;ENSG00000119699;ENSG00000087088;ENSG00000142208;ENSG00000141510;ENSG00000092969;ENSG00000109320;ENSG00000111276;ENSG00000174775	K04570+K13377+K02159+K04456+K04451+K13376+K02580+K06624+K02833
Organismal Systems	Nervous system	Cholinergic synapse	11	118	5.95177e-05	0.00040472	ko04725	ENSG00000182621;ENSG00000170345;ENSG00000171791;ENSG00000155897;ENSG00000148660;ENSG00000142208;ENSG00000070748;ENSG00000149782;ENSG00000087085;ENSG00000118260;ENSG00000174775	K05858+K04379+K02161+K08048+K04515+K04456+K00623+K05858+K01049+K05870+K02833
Organismal Systems	Nervous system	Glutamatergic synapse	11	119	6.43264e-05	0.000424716	ko04724	ENSG00000182621;ENSG00000134294;ENSG00000155897;ENSG00000149782;ENSG00000115419;ENSG00000198822;ENSG00000135821;ENSG00000162383;ENSG00000273079;ENSG00000168959;ENSG00000132535	K05858+K14207+K08048+K05858+K01425+K04606+K01915+K05618+K05210+K04604+K11828
Metabolism	Xenobiotics biodegradation and metabolism	Drug metabolism - other enzymes	9	80	6.55811e-05	0.000424716	ko00983	ENSG00000008394;ENSG00000148834;ENSG00000065621;ENSG00000134184;ENSG00000106348;ENSG00000103202;ENSG00000178035;ENSG00000103024;ENSG00000084207	K00799+K00799+K00799+K00799+K00088+K00940+K00088+K00940+K23790
Organismal Systems	Endocrine system	Estrogen signaling pathway	12	141	6.74662e-05	0.000426763	ko04915	ENSG00000182621;ENSG00000170345;ENSG00000171791;ENSG00000198668;ENSG00000087245;ENSG00000155897;ENSG00000164867;ENSG00000142208;ENSG00000149782;ENSG00000118260;ENSG00000174775;ENSG00000177606	K05858+K04379+K02161+K02183+K01398+K08048+K13242+K04456+K05858+K05870+K02833+K04448
Metabolism	Metabolism of cofactors and vitamins	One carbon pool by folate	5	21	7.87995e-05	0.000487124	ko00670	ENSG00000160282;ENSG00000177000;ENSG00000182199;ENSG00000228716;ENSG00000120254	K13990+K00297+K00600+K00287+K13402
Metabolism	Carbohydrate metabolism	Propanoate metabolism	6	36	0.000125231	0.00075695	ko00640	ENSG00000134333;ENSG00000083123;ENSG00000248098;ENSG00000091140;ENSG00000111716;ENSG00000166800	K00016+K00167+K00166+K00382+K00016+K00016
Organismal Systems	Nervous system	Long-term potentiation	8	69	0.000135646	0.000785403	ko04720	ENSG00000182621;ENSG00000198668;ENSG00000155897;ENSG00000148660;ENSG00000149782;ENSG00000273079;ENSG00000174775;ENSG00000168959	K05858+K02183+K08048+K04515+K05858+K05210+K02833+K04604
Human Diseases	Neurodegenerative diseases	Alzheimer disease	20	359	0.000135713	0.000785403	ko05010	ENSG00000142192;ENSG00000182621;ENSG00000198668;ENSG00000172115;ENSG00000007171;ENSG00000132906;ENSG00000147123;ENSG00000089250;ENSG00000164885;ENSG00000142208;ENSG00000149782;ENSG00000164305;ENSG00000136244;ENSG00000111640;ENSG00000109320;ENSG00000273079;ENSG00000186868;ENSG00000117118;ENSG00000174775;ENSG00000168959	K04520+K05858+K02183+K08738+K13241+K04399+K11351+K13240+K02090+K04456+K05858+K02187+K05405+K00134+K02580+K05210+K04380+K00235+K02833+K04604
Organismal Systems	Endocrine system	Parathyroid hormone synthesis, secretion and action	10	109	0.000148008	0.000808021	ko04928	ENSG00000133116;ENSG00000182621;ENSG00000170345;ENSG00000171791;ENSG00000155897;ENSG00000149782;ENSG00000077782;ENSG00000118260;ENSG00000120738;ENSG00000067560	K14756+K05858+K04379+K02161+K08048+K05858+K04362+K05870+K09203+K04513
Human Diseases	Infectious diseases	Chagas disease (American trypanosomiasis)	10	109	0.000148008	0.000808021	ko05142	ENSG00000182621;ENSG00000170345;ENSG00000007171;ENSG00000119699;ENSG00000142208;ENSG00000149782;ENSG00000092969;ENSG00000136244;ENSG00000109320;ENSG00000177606	K05858+K04379+K13241+K13377+K04456+K05858+K13376+K05405+K02580+K04448
Environmental Information Processing	Signal transduction	Rap1 signaling pathway	15	226	0.000148533	0.000808021	ko04015	ENSG00000182621;ENSG00000128271;ENSG00000198668;ENSG00000149295;ENSG00000064300;ENSG00000155897;ENSG00000001631;ENSG00000017427;ENSG00000142208;ENSG00000149782;ENSG00000077782;ENSG00000067560;ENSG00000273079;ENSG00000174775;ENSG00000134259	K05858+K04266+K02183+K04145+K02583+K08048+K17705+K05459+K04456+K05858+K04362+K04513+K05210+K02833+K02582
Organismal Systems	Endocrine system	Insulin secretion	9	91	0.000179662	0.000958196	ko04911	ENSG00000132639;ENSG00000182621;ENSG00000155897;ENSG00000148660;ENSG00000149782;ENSG00000220205;ENSG00000118260;ENSG00000117394;ENSG00000115263	K18211+K05858+K08048+K04515+K05858+K13504+K05870+K07299+K05259
Cellular Processes	Cell growth and death	p53 signaling pathway	8	72	0.000183448	0.000959575	ko04115	ENSG00000171791;ENSG00000171552;ENSG00000172115;ENSG00000132906;ENSG00000087088;ENSG00000017427;ENSG00000164305;ENSG00000141510	K02161+K04570+K08738+K04399+K02159+K05459+K02187+K04451
Human Diseases	Infectious diseases	HTLV-I infection	15	231	0.00018911	0.000970528	ko05166	ENSG00000170345;ENSG00000171552;ENSG00000119699;ENSG00000155897;ENSG00000087088;ENSG00000142208;ENSG00000141510;ENSG00000092969;ENSG00000136244;ENSG00000118260;ENSG00000109320;ENSG00000120738;ENSG00000117394;ENSG00000174775;ENSG00000177606	K04379+K04570+K13377+K08048+K02159+K04456+K04451+K13376+K05405+K05870+K02580+K09203+K07299+K02833+K04448
Human Diseases	Infectious diseases	Toxoplasmosis	10	113	0.00019962	0.00100549	ko05145	ENSG00000171791;ENSG00000171552;ENSG00000172115;ENSG00000007171;ENSG00000132906;ENSG00000119699;ENSG00000142208;ENSG00000164305;ENSG00000092969;ENSG00000109320	K02161+K04570+K08738+K13241+K04399+K13377+K04456+K02187+K13376+K02580
Human Diseases	Infectious diseases	Human cytomegalovirus infection	15	234	0.000217812	0.00107718	ko05163	ENSG00000182621;ENSG00000198668;ENSG00000172115;ENSG00000132906;ENSG00000155897;ENSG00000087088;ENSG00000142208;ENSG00000149782;ENSG00000164305;ENSG00000141510;ENSG00000136244;ENSG00000118260;ENSG00000109320;ENSG00000067560;ENSG00000174775	K05858+K02183+K08738+K04399+K08048+K02159+K04456+K05858+K02187+K04451+K05405+K05870+K02580+K04513+K02833
Human Diseases	Infectious diseases	Pertussis	8	78	0.000320808	0.00155821	ko05133	ENSG00000170345;ENSG00000198668;ENSG00000007171;ENSG00000164305;ENSG00000136244;ENSG00000109320;ENSG00000067560;ENSG00000177606	K04379+K02183+K13241+K02187+K05405+K02580+K04513+K04448
Human Diseases	Cancers	Glioma	8	79	0.00035027	0.00167147	ko05214	ENSG00000198668;ENSG00000087088;ENSG00000017427;ENSG00000148660;ENSG00000142208;ENSG00000141510;ENSG00000134072;ENSG00000174775	K02183+K02159+K05459+K04515+K04456+K04451+K08794+K02833
Human Diseases	Infectious diseases	Kaposi sarcoma-associated herpesvirus infection	13	194	0.000376584	0.00176605	ko05167	ENSG00000170345;ENSG00000198668;ENSG00000172115;ENSG00000132906;ENSG00000087088;ENSG00000142208;ENSG00000164305;ENSG00000141510;ENSG00000136244;ENSG00000118260;ENSG00000109320;ENSG00000174775;ENSG00000177606	K04379+K02183+K08738+K04399+K02159+K04456+K02187+K04451+K05405+K05870+K02580+K02833+K04448
Human Diseases	Cancers	Pancreatic cancer	8	81	0.000415822	0.0018983	ko05212	ENSG00000171552;ENSG00000132906;ENSG00000119699;ENSG00000087088;ENSG00000142208;ENSG00000141510;ENSG00000092969;ENSG00000109320	K04570+K04399+K13377+K02159+K04456+K04451+K13376+K02580
Environmental Information Processing	Signal transduction	MAPK signaling pathway	17	304	0.000420836	0.0018983	ko04010	ENSG00000170345;ENSG00000176697;ENSG00000153956;ENSG00000119699;ENSG00000064300;ENSG00000145715;ENSG00000017427;ENSG00000142208;ENSG00000164305;ENSG00000141510;ENSG00000077782;ENSG00000092969;ENSG00000109320;ENSG00000186868;ENSG00000174775;ENSG00000177606;ENSG00000134259	K04379+K04355+K04858+K13377+K02583+K04352+K05459+K04456+K02187+K04451+K04362+K13376+K02580+K04380+K02833+K04448+K02582
Organismal Systems	Environmental adaptation	Circadian entrainment	9	102	0.000425722	0.0018983	ko04713	ENSG00000182621;ENSG00000170345;ENSG00000198668;ENSG00000155897;ENSG00000089250;ENSG00000148660;ENSG00000149782;ENSG00000118260;ENSG00000273079	K05858+K04379+K02183+K08048+K13240+K04515+K05858+K05870+K05210
Human Diseases	Cancers	Hepatocellular carcinoma	12	172	0.000439613	0.00192863	ko05225	ENSG00000008394;ENSG00000148834;ENSG00000171552;ENSG00000065621;ENSG00000119699;ENSG00000134184;ENSG00000087088;ENSG00000142208;ENSG00000141510;ENSG00000092969;ENSG00000084207;ENSG00000174775	K00799+K00799+K04570+K00799+K13377+K00799+K02159+K04456+K04451+K13376+K23790+K02833
Environmental Information Processing	Signal transduction	Sphingolipid signaling pathway	10	125	0.000453067	0.0019561	ko04071	ENSG00000182621;ENSG00000171791;ENSG00000164867;ENSG00000087088;ENSG00000142208;ENSG00000149782;ENSG00000141510;ENSG00000109320;ENSG00000067560;ENSG00000174775	K05858+K02161+K13242+K02159+K04456+K05858+K04451+K02580+K04513+K02833
Human Diseases	Infectious diseases	Tuberculosis	15	257	0.000592726	0.00251909	ko05152	ENSG00000171791;ENSG00000198668;ENSG00000172115;ENSG00000007171;ENSG00000132906;ENSG00000119699;ENSG00000087088;ENSG00000148660;ENSG00000142208;ENSG00000164305;ENSG00000092969;ENSG00000136244;ENSG00000118260;ENSG00000109320;ENSG00000067560	K02161+K02183+K08738+K13241+K04399+K13377+K02159+K04515+K04456+K02187+K13376+K05405+K05870+K02580+K04513
Human Diseases	Neurodegenerative diseases	Huntington disease	16	288	0.000668914	0.00279915	ko05016	ENSG00000142168;ENSG00000198959;ENSG00000182621;ENSG00000176697;ENSG00000172115;ENSG00000132906;ENSG00000147123;ENSG00000087088;ENSG00000149782;ENSG00000164305;ENSG00000141510;ENSG00000118260;ENSG00000273079;ENSG00000117118;ENSG00000168959;ENSG00000132535	K04565+K05625+K05858+K04355+K08738+K04399+K11351+K02159+K05858+K02187+K04451+K05870+K05210+K00235+K04604+K11828
Human Diseases	Substance dependence	Amphetamine addiction	7	70	0.000886777	0.0036546	ko05031	ENSG00000170345;ENSG00000198668;ENSG00000180176;ENSG00000148660;ENSG00000118260;ENSG00000273079;ENSG00000177606	K04379+K02183+K00501+K04515+K05870+K05210+K04448
Environmental Information Processing	Signal transduction	Calcium signaling pathway	15	273	0.00110183	0.00447309	ko04020	ENSG00000182621;ENSG00000128271;ENSG00000198668;ENSG00000169676;ENSG00000007171;ENSG00000115353;ENSG00000155897;ENSG00000089250;ENSG00000164867;ENSG00000004468;ENSG00000148660;ENSG00000149782;ENSG00000134072;ENSG00000187848;ENSG00000168959	K05858+K04266+K02183+K05840+K13241+K04222+K08048+K13240+K13242+K01242+K04515+K05858+K08794+K05216+K04604
Environmental Information Processing	Signal transduction	Apelin signaling pathway	10	141	0.00116125	0.00464502	ko04371	ENSG00000182621;ENSG00000198668;ENSG00000007171;ENSG00000155897;ENSG00000089250;ENSG00000164867;ENSG00000142208;ENSG00000149782;ENSG00000120738;ENSG00000174775	K05858+K02183+K13241+K08048+K13240+K13242+K04456+K05858+K09203+K02833
Human Diseases	Cancers	Renal cell carcinoma	7	75	0.0013376	0.00522392	ko05211	ENSG00000119699;ENSG00000142208;ENSG00000092969;ENSG00000117394;ENSG00000174775;ENSG00000177606;ENSG00000091483	K13377+K04456+K13376+K07299+K02833+K04448+K01679
Environmental Information Processing	Signal transduction	Ras signaling pathway	14	250	0.00134439	0.00522392	ko04014	ENSG00000198668;ENSG00000171552;ENSG00000176697;ENSG00000064300;ENSG00000170890;ENSG00000145715;ENSG00000017427;ENSG00000142208;ENSG00000077782;ENSG00000109320;ENSG00000067560;ENSG00000273079;ENSG00000174775;ENSG00000134259	K02183+K04570+K04355+K02583+K01047+K04352+K05459+K04456+K04362+K02580+K04513+K05210+K02833+K02582
Human Diseases	Cancers	Melanoma	7	76	0.00144612	0.00554007	ko05218	ENSG00000087088;ENSG00000017427;ENSG00000142208;ENSG00000141510;ENSG00000077782;ENSG00000187098;ENSG00000174775	K02159+K05459+K04456+K04451+K04362+K09455+K02833
Environmental Information Processing	Signal transduction	Jak-STAT signaling pathway	11	171	0.00147881	0.00558661	ko04630	ENSG00000128342;ENSG00000172179;ENSG00000171791;ENSG00000171552;ENSG00000174697;ENSG00000115145;ENSG00000142208;ENSG00000108342;ENSG00000136244;ENSG00000174775;ENSG00000131095	K05419+K05439+K02161+K04570+K05424+K04705+K04456+K05423+K05405+K02833+K05640
Organismal Systems	Digestive system	Gastric acid secretion	7	77	0.00156139	0.0058178	ko04971	ENSG00000182621;ENSG00000198668;ENSG00000001626;ENSG00000155897;ENSG00000157005;ENSG00000148660;ENSG00000149782	K05858+K02183+K05031+K08048+K05237+K04515+K05858
Metabolism	Amino acid metabolism	Tyrosine metabolism	5	39	0.00161197	0.00592509	ko00350	ENSG00000093010;ENSG00000120053;ENSG00000158104;ENSG00000180176;ENSG00000198650	K00545+K14454+K00457+K00501+K00815
Human Diseases	Infectious diseases	Legionellosis	6	58	0.001736	0.00621325	ko05134	ENSG00000101210;ENSG00000172115;ENSG00000132906;ENSG00000164305;ENSG00000136244;ENSG00000109320	K03231+K08738+K04399+K02187+K05405+K02580
Organismal Systems	Endocrine system	Growth hormone synthesis, secretion and action	9	124	0.00173606	0.00621325	ko04935	ENSG00000182621;ENSG00000170345;ENSG00000155897;ENSG00000157005;ENSG00000017427;ENSG00000142208;ENSG00000149782;ENSG00000118260;ENSG00000174775	K05858+K04379+K08048+K05237+K05459+K04456+K05858+K05870+K02833
Organismal Systems	Endocrine system	Melanogenesis	8	102	0.00190825	0.00674082	ko04916	ENSG00000182621;ENSG00000198668;ENSG00000155897;ENSG00000148660;ENSG00000149782;ENSG00000118260;ENSG00000187098;ENSG00000174775	K05858+K02183+K08048+K04515+K05858+K05870+K09455+K02833
Organismal Systems	Sensory system	Inflammatory mediator regulation of TRP channels	8	103	0.0020304	0.00708036	ko04750	ENSG00000182621;ENSG00000198668;ENSG00000155897;ENSG00000017427;ENSG00000148660;ENSG00000149782;ENSG00000196689;ENSG00000134259	K05858+K02183+K08048+K05459+K04515+K05858+K05222+K02582
Metabolism	Amino acid metabolism	Glycine, serine and threonine metabolism	5	43	0.00250861	0.00852926	ko00260	ENSG00000160200;ENSG00000135069;ENSG00000182199;ENSG00000091140;ENSG00000092621	K01697+K00831+K00600+K00382+K00058
Cellular Processes	Cell growth and death	Ferroptosis	5	43	0.00250861	0.00852926	ko04216	ENSG00000100983;ENSG00000001084;ENSG00000151012;ENSG00000023909;ENSG00000141510	K21456+K11204+K13869+K11205+K04451
Human Diseases	Drug resistance	EGFR tyrosine kinase inhibitor resistance	7	85	0.00276185	0.00926181	ko01521	ENSG00000171791;ENSG00000171552;ENSG00000087088;ENSG00000017427;ENSG00000142208;ENSG00000136244;ENSG00000174775	K02161+K04570+K02159+K05459+K04456+K05405+K02833
Organismal Systems	Excretory system	Proximal tubule bicarbonate reclamation	4	27	0.00279216	0.00926181	ko04964	ENSG00000167434;ENSG00000148672;ENSG00000115419;ENSG00000014641	K18246+K00261+K01425+K00025
Metabolism	Metabolism of cofactors and vitamins	Folate biosynthesis	4	28	0.00320163	0.0104921	ko00790	ENSG00000136877;ENSG00000228716;ENSG00000180176;ENSG00000137563	K01930+K00287+K00501+K01307
Human Diseases	Endocrine and metabolic diseases	Non-alcoholic fatty liver disease (NAFLD)	10	164	0.00355522	0.0115121	ko04932	ENSG00000172115;ENSG00000174697;ENSG00000147123;ENSG00000087088;ENSG00000142208;ENSG00000164305;ENSG00000136244;ENSG00000109320;ENSG00000117118;ENSG00000177606	K08738+K05424+K11351+K02159+K04456+K02187+K05405+K02580+K00235+K04448
Environmental Information Processing	Signal transduction	TNF signaling pathway	8	114	0.00382266	0.0120903	ko04668	ENSG00000128342;ENSG00000170345;ENSG00000142208;ENSG00000164305;ENSG00000136244;ENSG00000118260;ENSG00000109320;ENSG00000177606	K05419+K04379+K04456+K02187+K05405+K05870+K02580+K04448
Human Diseases	Endocrine and metabolic diseases	Insulin resistance	8	114	0.00382266	0.0120903	ko04931	ENSG00000104812;ENSG00000164867;ENSG00000142208;ENSG00000136244;ENSG00000118260;ENSG00000109320;ENSG00000117394;ENSG00000198380	K00693+K13242+K04456+K05405+K05870+K02580+K07299+K00820
Organismal Systems	Aging	Longevity regulating pathway - multiple species	6	68	0.00390981	0.0122238	ko04213	ENSG00000142168;ENSG00000121691;ENSG00000155897;ENSG00000017427;ENSG00000142208;ENSG00000174775	K04565+K03781+K08048+K05459+K04456+K02833
Metabolism	Metabolism of other amino acids	Taurine and hypotaurine metabolism	3	15	0.00405192	0.0125241	ko00430	ENSG00000136750;ENSG00000100031;ENSG00000128683	K01580+K18592+K01580
Human Diseases	Infectious diseases	Salmonella infection	12	224	0.00421554	0.0128457	ko05132	ENSG00000170345;ENSG00000171791;ENSG00000172115;ENSG00000087088;ENSG00000142208;ENSG00000164305;ENSG00000136244;ENSG00000111640;ENSG00000109320;ENSG00000067560;ENSG00000174775;ENSG00000177606	K04379+K02161+K08738+K02159+K04456+K02187+K05405+K00134+K02580+K04513+K02833+K04448
Organismal Systems	Nervous system	Serotonergic synapse	8	116	0.00425041	0.0128457	ko04726	ENSG00000142192;ENSG00000182621;ENSG00000135312;ENSG00000178394;ENSG00000149782;ENSG00000164305;ENSG00000174775;ENSG00000166736	K04520+K05858+K04153+K04153+K05858+K02187+K02833+K04819
Organismal Systems	Nervous system	GABAergic synapse	7	92	0.00430507	0.0128679	ko04727	ENSG00000136750;ENSG00000157103;ENSG00000134294;ENSG00000155897;ENSG00000128683;ENSG00000115419;ENSG00000135821	K01580+K05034+K14207+K08048+K01580+K01425+K01915
Human Diseases	Infectious disease: viral	Human immunodeficiency virus 1 infection	12	225	0.00436827	0.0129149	ko05170	ENSG00000170345;ENSG00000171791;ENSG00000198668;ENSG00000171552;ENSG00000172115;ENSG00000132906;ENSG00000087088;ENSG00000142208;ENSG00000164305;ENSG00000109320;ENSG00000174775;ENSG00000177606	K04379+K02161+K02183+K04570+K08738+K04399+K02159+K04456+K02187+K02580+K02833+K04448
Organismal Systems	Digestive system	Salivary secretion	7	93	0.00457004	0.0133661	ko04970	ENSG00000182621;ENSG00000198668;ENSG00000155897;ENSG00000089250;ENSG00000004468;ENSG00000149782;ENSG00000220205	K05858+K02183+K08048+K13240+K01242+K05858+K13504
Environmental Information Processing	Signal transduction	PI3K-Akt signaling pathway	19	445	0.00469125	0.0135747	ko04151	ENSG00000172179;ENSG00000171791;ENSG00000171552;ENSG00000176697;ENSG00000132906;ENSG00000064300;ENSG00000104812;ENSG00000164867;ENSG00000017427;ENSG00000142208;ENSG00000108342;ENSG00000141510;ENSG00000077782;ENSG00000136244;ENSG00000118260;ENSG00000109320;ENSG00000111276;ENSG00000174775;ENSG00000134259	K05439+K02161+K04570+K04355+K04399+K02583+K00693+K13242+K05459+K04456+K05423+K04451+K04362+K05405+K05870+K02580+K06624+K02833+K02582
Human Diseases	Cancers	MicroRNAs in cancer	10	176	0.00584562	0.0166057	ko05206	ENSG00000171791;ENSG00000085563;ENSG00000164305;ENSG00000141510;ENSG00000092969;ENSG00000115419;ENSG00000109320;ENSG00000067560;ENSG00000111276;ENSG00000174775	K02161+K05658+K02187+K04451+K13376+K01425+K02580+K04513+K06624+K02833
Metabolism	Energy metabolism	Nitrogen metabolism	3	17	0.00586084	0.0166057	ko00910	ENSG00000167434;ENSG00000148672;ENSG00000135821	K18246+K00261+K01915
Organismal Systems	Digestive system	Bile secretion	6	74	0.00593172	0.0166333	ko04976	ENSG00000171885;ENSG00000125255;ENSG00000001626;ENSG00000155897;ENSG00000085563;ENSG00000117394	K09866+K14342+K05031+K08048+K05658+K07299
Human Diseases	Infectious diseases	Amoebiasis	10	177	0.00607901	0.0168724	ko05146	ENSG00000182621;ENSG00000007171;ENSG00000119699;ENSG00000118520;ENSG00000081181;ENSG00000149782;ENSG00000164305;ENSG00000092969;ENSG00000136244;ENSG00000109320	K05858+K13241+K13377+K01476+K01476+K05858+K02187+K13376+K05405+K02580
Organismal Systems	Endocrine system	Aldosterone synthesis and secretion	7	99	0.00642678	0.0176574	ko04925	ENSG00000182621;ENSG00000198668;ENSG00000155897;ENSG00000148660;ENSG00000149782;ENSG00000118260;ENSG00000134072	K05858+K02183+K08048+K04515+K05858+K05870+K08794
Organismal Systems	Circulatory system	Adrenergic signaling in cardiomyocytes	9	152	0.0067537	0.0183701	ko04261	ENSG00000182621;ENSG00000171791;ENSG00000198668;ENSG00000153956;ENSG00000155897;ENSG00000148660;ENSG00000142208;ENSG00000149782;ENSG00000118260	K05858+K02161+K02183+K04858+K08048+K04515+K04456+K05858+K05870
Metabolism	Amino acid metabolism	Phenylalanine metabolism	3	18	0.00691917	0.0184005	ko00360	ENSG00000120053;ENSG00000158104;ENSG00000198650	K14454+K00457+K00815
Metabolism	Amino acid metabolism	Phenylalanine, tyrosine and tryptophan biosynthesis	2	6	0.00696784	0.0184005	ko00400	ENSG00000120053;ENSG00000198650	K14454+K00815
Metabolism	Metabolism of other amino acids	D-Glutamine and D-glutamate metabolism	2	6	0.00696784	0.0184005	ko00471	ENSG00000148672;ENSG00000115419	K00261+K01425
Human Diseases	Cancers	Gastric cancer	9	153	0.00704173	0.0184168	ko05226	ENSG00000171791;ENSG00000119699;ENSG00000087088;ENSG00000085563;ENSG00000142208;ENSG00000141510;ENSG00000092969;ENSG00000111276;ENSG00000174775	K02161+K13377+K02159+K05658+K04456+K04451+K13376+K06624+K02833
Human Diseases	Neurodegenerative diseases	Prion diseases	4	35	0.00725582	0.018796	ko05020	ENSG00000142168;ENSG00000087088;ENSG00000136244;ENSG00000120738	K04565+K02159+K05405+K09203
Organismal Systems	Endocrine system	Prolactin signaling pathway	6	78	0.00764712	0.0194527	ko04917	ENSG00000172179;ENSG00000170345;ENSG00000180176;ENSG00000142208;ENSG00000109320;ENSG00000174775	K05439+K04379+K00501+K04456+K02580+K02833
Human Diseases	Cancers	Proteoglycans in cancer	11	212	0.00765234	0.0194527	ko05205	ENSG00000087245;ENSG00000147065;ENSG00000017427;ENSG00000148660;ENSG00000142208;ENSG00000164305;ENSG00000141510;ENSG00000077782;ENSG00000092969;ENSG00000067560;ENSG00000174775	K01398+K05763+K05459+K04515+K04456+K02187+K04451+K04362+K13376+K04513+K02833
Organismal Systems	Digestive system	Pancreatic secretion	7	105	0.00879527	0.0221511	ko04972	ENSG00000182621;ENSG00000001626;ENSG00000155897;ENSG00000170890;ENSG00000004468;ENSG00000149782;ENSG00000067560	K05858+K05031+K08048+K01047+K01242+K05858+K04513
Organismal Systems	Immune system	C-type lectin receptor signaling pathway	7	108	0.0101949	0.0254404	ko04625	ENSG00000198668;ENSG00000142208;ENSG00000136244;ENSG00000109320;ENSG00000067560;ENSG00000174775;ENSG00000177606	K02183+K04456+K05405+K02580+K04513+K02833+K04448
Organismal Systems	Circulatory system	Vascular smooth muscle contraction	8	135	0.0103882	0.0256873	ko04270	ENSG00000182621;ENSG00000128271;ENSG00000198668;ENSG00000101200;ENSG00000155897;ENSG00000170890;ENSG00000149782;ENSG00000067560	K05858+K04266+K02183+K05242+K08048+K01047+K05858+K04513
Organismal Systems	Nervous system	Long-term depression	5	62	0.0120225	0.0294605	ko04730	ENSG00000182621;ENSG00000089250;ENSG00000017427;ENSG00000149782;ENSG00000174775	K05858+K13240+K05459+K05858+K02833
Environmental Information Processing	Signal transduction	FoxO signaling pathway	8	139	0.0122548	0.0297616	ko04068	ENSG00000121691;ENSG00000119699;ENSG00000017427;ENSG00000142208;ENSG00000092969;ENSG00000136244;ENSG00000111276;ENSG00000174775	K03781+K13377+K05459+K04456+K13376+K05405+K06624+K02833
Human Diseases	Cancers	Endometrial cancer	5	63	0.0128297	0.030882	ko05213	ENSG00000132906;ENSG00000087088;ENSG00000142208;ENSG00000141510;ENSG00000174775	K04399+K02159+K04456+K04451+K02833
Metabolism	Amino acid metabolism	Histidine metabolism	3	24	0.0155674	0.0371432	ko00340	ENSG00000160282;ENSG00000139344;ENSG00000108381	K13990+K01468+K01437
Organismal Systems	Endocrine system	GnRH secretion	5	67	0.0164241	0.0388465	ko04929	ENSG00000182621;ENSG00000147437;ENSG00000142208;ENSG00000149782;ENSG00000174775	K05858+K05252+K04456+K05858+K02833
Cellular Processes	Cellular community - eukaryotes	Gap junction	6	93	0.0172935	0.0404914	ko04540	ENSG00000182621;ENSG00000149295;ENSG00000155897;ENSG00000149782;ENSG00000174775;ENSG00000168959	K05858+K04145+K08048+K05858+K02833+K04604
Cellular Processes	Transport and catabolism	Mitophagy - animal	5	68	0.0174173	0.0404914	ko04137	ENSG00000171552;ENSG00000141510;ENSG00000187098;ENSG00000174775;ENSG00000177606	K04570+K04451+K09455+K02833+K04448
Metabolism	Xenobiotics biodegradation and metabolism	Drug metabolism - cytochrome P450	5	70	0.0195213	0.0438826	ko00982	ENSG00000008394;ENSG00000148834;ENSG00000065621;ENSG00000134184;ENSG00000084207	K00799+K00799+K00799+K00799+K23790
Organismal Systems	Endocrine system	Adipocytokine signaling pathway	5	70	0.0195213	0.0438826	ko04920	ENSG00000122585;ENSG00000174697;ENSG00000142208;ENSG00000109320;ENSG00000117394	K05232+K05424+K04456+K02580+K07299
Human Diseases	Cancers	Non-small cell lung cancer	5	70	0.0195213	0.0438826	ko05223	ENSG00000132906;ENSG00000087088;ENSG00000142208;ENSG00000141510;ENSG00000174775	K04399+K02159+K04456+K04451+K02833
Human Diseases	Immune diseases	Inflammatiory bowel disease (IBD)	5	70	0.0195213	0.0438826	ko05321	ENSG00000119699;ENSG00000092969;ENSG00000136244;ENSG00000109320;ENSG00000177606	K13377+K13376+K05405+K02580+K04448
Organismal Systems	Excretory system	Vasopressin-regulated water reabsorption	4	47	0.0201241	0.0448669	ko04962	ENSG00000171885;ENSG00000101200;ENSG00000220205;ENSG00000118260	K09866+K05242+K13504+K05870
Metabolism	Carbohydrate metabolism	Glycolysis / Gluconeogenesis	5	71	0.0206333	0.045628	ko00010	ENSG00000134333;ENSG00000091140;ENSG00000111716;ENSG00000111640;ENSG00000166800	K00016+K00382+K00016+K00134+K00016
Organismal Systems	Immune system	IL-17 signaling pathway	6	97	0.0208584	0.045754	ko04657	ENSG00000170345;ENSG00000108342;ENSG00000164305;ENSG00000136244;ENSG00000109320;ENSG00000177606	K04379+K05423+K02187+K05405+K02580+K04448
Organismal Systems	Immune system	NOD-like receptor signaling pathway	9	184	0.0215594	0.0469132	ko04621	ENSG00000182621;ENSG00000091592;ENSG00000171791;ENSG00000171552;ENSG00000149782;ENSG00000136244;ENSG00000109320;ENSG00000067560;ENSG00000177606	K05858+K12798+K02161+K04570+K05858+K05405+K02580+K04513+K04448
Environmental Information Processing	Signal transduction	AMPK signaling pathway	7	126	0.0221787	0.0476251	ko04152	ENSG00000167658;ENSG00000174697;ENSG00000001626;ENSG00000104812;ENSG00000017427;ENSG00000142208;ENSG00000118260	K03234+K05424+K05031+K00693+K05459+K04456+K05870
Human Diseases	Neurodegenerative diseases	Parkinson disease	8	155	0.0222367	0.0476251	ko05012	ENSG00000128271;ENSG00000172115;ENSG00000132906;ENSG00000147123;ENSG00000149295;ENSG00000180176;ENSG00000164305;ENSG00000117118	K04266+K08738+K04399+K11351+K04145+K00501+K02187+K00235
Human Diseases	Cancers	Breast cancer	8	156	0.0230083	0.0488926	ko05224	ENSG00000170345;ENSG00000087088;ENSG00000017427;ENSG00000142208;ENSG00000141510;ENSG00000077782;ENSG00000174775;ENSG00000177606	K04379+K02159+K05459+K04456+K04451+K04362+K02833+K04448
Metabolism	Carbohydrate metabolism	Butanoate metabolism	3	28	0.0236195	0.0498024	ko00650	ENSG00000136750;ENSG00000112294;ENSG00000128683	K01580+K00139+K01580
Human Diseases	Infectious diseases	Shigellosis	11	251	0.0243351	0.0509165	ko05131	ENSG00000182621;ENSG00000171791;ENSG00000171552;ENSG00000172115;ENSG00000087088;ENSG00000142208;ENSG00000149782;ENSG00000141510;ENSG00000109320;ENSG00000067560;ENSG00000177606	K05858+K02161+K04570+K08738+K02159+K04456+K05858+K04451+K02580+K04513+K04448
Metabolism	Amino acid metabolism	Valine, leucine and isoleucine degradation	4	50	0.0246896	0.0512114	ko00280	ENSG00000106049;ENSG00000083123;ENSG00000248098;ENSG00000091140	K00020+K00167+K00166+K00382
Organismal Systems	Endocrine system	Thyroid hormone signaling pathway	7	129	0.0248526	0.0512114	ko04919	ENSG00000182621;ENSG00000132906;ENSG00000142208;ENSG00000149782;ENSG00000141510;ENSG00000117394;ENSG00000174775	K05858+K04399+K04456+K05858+K04451+K07299+K02833
Metabolism	Xenobiotics biodegradation and metabolism	Metabolism of xenobiotics by cytochrome P450	5	75	0.0254924	0.0521348	ko00980	ENSG00000008394;ENSG00000148834;ENSG00000065621;ENSG00000134184;ENSG00000084207	K00799+K00799+K00799+K00799+K23790
Organismal Systems	Immune system	Platelet activation	7	130	0.025791	0.0523519	ko04611	ENSG00000182621;ENSG00000180210;ENSG00000155897;ENSG00000164867;ENSG00000142208;ENSG00000149782;ENSG00000067560	K05858+K01313+K08048+K13242+K04456+K05858+K04513
Metabolism	Metabolism of cofactors and vitamins	Ubiquinone and other terpenoid-quinone biosynthesis	2	12	0.0280843	0.0565847	ko00130	ENSG00000158104;ENSG00000198650	K00457+K00815
Organismal Systems	Development	Osteoclast differentiation	7	133	0.0287514	0.0574672	ko04380	ENSG00000170345;ENSG00000142208;ENSG00000092969;ENSG00000118260;ENSG00000109320;ENSG00000187098;ENSG00000177606	K04379+K04456+K13376+K05870+K02580+K09455+K04448
Human Diseases	Infectious diseases	Hepatitis C	8	163	0.0289449	0.0574672	ko05160	ENSG00000172115;ENSG00000132906;ENSG00000087088;ENSG00000142208;ENSG00000164305;ENSG00000141510;ENSG00000109320;ENSG00000174775	K08738+K04399+K02159+K04456+K02187+K04451+K02580+K02833
Human Diseases	Substance dependence	Alcoholism	9	195	0.029938	0.0590083	ko05034	ENSG00000122585;ENSG00000128271;ENSG00000198668;ENSG00000176697;ENSG00000149295;ENSG00000180176;ENSG00000118260;ENSG00000273079;ENSG00000174775	K05232+K04266+K02183+K04355+K04145+K00501+K05870+K05210+K02833
Metabolism	Nucleotide metabolism	Purine metabolism	7	135	0.0308482	0.0603649	ko00230	ENSG00000155897;ENSG00000106348;ENSG00000178921;ENSG00000103202;ENSG00000178035;ENSG00000103024;ENSG00000135318	K08048+K00088+K01952+K00940+K00088+K00940+K19970
Organismal Systems	Excretory system	Endocrine and other factor-regulated calcium reabsorption	4	54	0.0316778	0.0608876	ko04961	ENSG00000133116;ENSG00000182621;ENSG00000104327;ENSG00000149782	K14756+K05858+K14757+K05858
Environmental Information Processing	Signal transduction	Phospholipase D signaling pathway	10	229	0.0317185	0.0608876	ko04072	ENSG00000182621;ENSG00000101200;ENSG00000180210;ENSG00000155897;ENSG00000142208;ENSG00000149782;ENSG00000198822;ENSG00000067560;ENSG00000174775;ENSG00000168959	K05858+K05242+K01313+K08048+K04456+K05858+K04606+K04513+K02833+K04604
Cellular Processes	Cell growth and death	Cellular senescence	8	166	0.0317869	0.0608876	ko04218	ENSG00000198668;ENSG00000119699;ENSG00000142208;ENSG00000141510;ENSG00000092969;ENSG00000136244;ENSG00000109320;ENSG00000174775	K02183+K13377+K04456+K04451+K13376+K05405+K02580+K02833
Human Diseases	Infectious diseases	Malaria	4	55	0.0335883	0.0638883	ko05144	ENSG00000119699;ENSG00000108342;ENSG00000092969;ENSG00000136244	K13377+K05423+K13376+K05405
Organismal Systems	Sensory system	Taste transduction	5	81	0.034062	0.0643394	ko04742	ENSG00000155897;ENSG00000135312;ENSG00000178394;ENSG00000187848;ENSG00000166736	K08048+K04153+K04153+K05216+K04819
Organismal Systems	Immune system	T cell receptor signaling pathway	6	111	0.0371672	0.0697205	ko04660	ENSG00000170345;ENSG00000142208;ENSG00000109320;ENSG00000067560;ENSG00000174775;ENSG00000177606	K04379+K04456+K02580+K04513+K02833+K04448
Environmental Information Processing	Signal transduction	cGMP - PKG signaling pathway	8	175	0.0414458	0.0772142	ko04022	ENSG00000182621;ENSG00000198668;ENSG00000155897;ENSG00000164867;ENSG00000142208;ENSG00000149782;ENSG00000118260;ENSG00000067560	K05858+K02183+K08048+K13242+K04456+K05858+K05870+K04513
Human Diseases	Cancers	Chemical carcinogenesis	5	86	0.0424233	0.0784975	ko05204	ENSG00000008394;ENSG00000148834;ENSG00000065621;ENSG00000134184;ENSG00000084207	K00799+K00799+K00799+K00799+K23790
Human Diseases	Cancers	Viral carcinogenesis	9	209	0.0435997	0.0801291	ko05203	ENSG00000087088;ENSG00000164305;ENSG00000141510;ENSG00000118260;ENSG00000109320;ENSG00000067560;ENSG00000111276;ENSG00000174775;ENSG00000177606	K02159+K02187+K04451+K05870+K02580+K04513+K06624+K02833+K04448
Environmental Information Processing	Signal transduction	ErbB signaling pathway	5	88	0.0460853	0.0841288	ko04012	ENSG00000148660;ENSG00000142208;ENSG00000111276;ENSG00000174775;ENSG00000177606	K04515+K04456+K06624+K02833+K04448
Human Diseases	Infectious diseases	Leishmaniasis	7	149	0.0484319	0.0878233	ko05140	ENSG00000170345;ENSG00000101210;ENSG00000007171;ENSG00000119699;ENSG00000092969;ENSG00000109320;ENSG00000177606	K04379+K03231+K13241+K13377+K13376+K02580+K04448
Human Diseases	Infectious diseases	Epstein-Barr virus infection	11	282	0.0499746	0.0900204	ko05169	ENSG00000171791;ENSG00000172115;ENSG00000132906;ENSG00000087088;ENSG00000142208;ENSG00000164305;ENSG00000141510;ENSG00000136244;ENSG00000109320;ENSG00000111276;ENSG00000177606	K02161+K08738+K04399+K02159+K04456+K02187+K04451+K05405+K02580+K06624+K04448
