# Supplementary material for: Exploring the mechanism of Shendi Bushen capsule in anti-renal fibrosis using metabolomics theory and network analysis
Source: Royal Society of Chemistry journal article supplement (doi:10.1039/d2mo00141a), 2022-08-15
Supplement: d2mo00141a8.xlsx [file d2mo00141a8.xlsx]

## Sheet: Metabolite-related genes
GRIN2D
GRIA2
AKT1
CDK5
HRAS
ADCY2
PICK1
GRM7
JUN
GRIP1
RHOA
SLC2A1
GLA
MMP2
CAT
GFAP
SORT1
TP53
ARL6IP5
GRIN2B
APP
BAX
DLG4
NOS3
IGF1
FOS
VAMP2
PHLDA2
BCL2
GRIN2A
TGFB2
ENG
TH
PPT1
NPY
IL6
SOD1
GNRH1
ATP5O
PRL
CASP3
LEP
CALM1
TGM2
PDC
GRIK1
CREB1
CFTR
NR3C1
PPP3CC
ASS1
CAMK2B
MARS
CALB1
S100B
BCL2L1
HOMER1
MAPT
CS
NGF
NANOS2
FGFR1
ABP1
GTF2A1L
2022-03-07
MITF
NTF4
BDNF
ASNS
DLD
HMOX2
CLC
NFKB1
SLC10A2
SNAP25
CAMK1
SYT1
PRKCG
ABCB1
SLC1A2
GRID2
SYN1
ANPEP
CA4
ACHE
PLA2G1B
GDNF
PENK
IDH2
KCND2
ADORA2A
PLCB1
TAT
UNC13B
PHEX
AQP4
GSTP1
GCG
GCA
DECR1
GOT2
SIGMAR1
OXA1L
ADCY8
CYCS
TAC1
CBS
AKAP9
LDHA
CD38
EPRS
ARG1
FGD1
MPST
GSTM2
GLUL
PFKM
GFPT1
ACTN2
PC
GAD2
HSD17B12
GPT2
GAD1
SLC1A1
SLC1A3
TSTD1
OAT
RAB3A
SYP
BST1
RASA1
GRM5
GSTM1
KRIT1
MSN
RASGRF1
SLC17A7
RASGRF2
GRIA1
CACNG2
CAMK2D
CACNA2D1
GRIN1
CAMK2A
BIRC5
DBT
AIDA
CNR2
AIMP1
NGFR
EGR1
GGT1
GGT7
GGT5
EEF1A2
ARID4B
ENPEP
NDUFB11
EEF2
ASPM
GRIA3
GRIK2
GAPDH
LIF
GRIA4
TACR1
NOS2
KL
RBFOX3
AIFM1
LGSN
IARS
KARS
CTPS2
ACO2
PDYN
AIMP2
AADAT
LDHB
MDH1
GFPT2
NT5E
HIBADH
GGCT
LDHC
LDHAL6A
LDHAL6B
HOMER2
QARS
SHMT1
MDH2
SLC25A18
SHMT2
PRODH
FH
GSTO1
SDHB
GART
GPT
PVALB
SST
SLC7A11
DHFR
DNPEP
CSF3
SLC16A1
MGST1
CDKN1B
GRM6
AVP
GMPS
HMBS
GSTZ1
GSTT1
GSTM5
GGH
MGST2
GSTO2
GSTM4
FPGS
NOS1
RNF213
NANOS3
HTR3A
DRD2
NANOS1
OTC
LARS
GSS
GCLC
PLK2
CCBL1
GGT6
PNOC
DARS
PHGDH
MAP2
GRM2
TGFB3
FOLH1
NLRP1
BCKDHA
CASP9
CHAT
P2RX2
NTF3
NME3
NME4
RRAD
IMPDH1
NME7
ALDH7A1
NME6
COMT
HCRT
IMPDH2
RARS
GRM3
GRM4
HTR1A
HTR1B
NTS
OGDH
PET112
DRD5
GLRA2
HPD
CAMK2G
CPLX1
PPP1R1B
SLC32A1
SLC1A6
SLC6A11
SLC6A1
CALB2
SLC17A8
GLUD2
DTNBP1
CHRNA4
SLC38A2
NRGN
CGN
GRIN2C
BCKDHB
HAL
ARG2
SLC25A13
ABAT
GLUD1
FTCD
NAGS
GLS2
PYCR1
ALDH18A1
PSAT1
SLC18A3
CCBL2
PFAS
BCAT2
PLCB2
PLCB3
GCDH
CDO1
GRIK5
GLRB
GLRA3
GLRA1
GLRA4
BAMBI
PORCN
F2
UROD
SLC38A1
BCAT1
SRR
TRPV1
TAS1R1
TAS1R3
TAS1R2
GLS
SPTBN2
KMO
SLC1A7
SLC17A6
NMNAT2
NMNAT3
NMNAT1
GCLM
REPIN1
SLC1A4
ALDH4A1
GOT1
CPA2
SLC16A10
CSAD
ZNF416
GRIN3B
GRIN3A
NDOR1
GGCX
SCCPDH
GRINA
CNIH3
OR4F3
ALDH5A1
EIF2D
SLC25A12
PSAPL1
AMDHD1
GNPNAT1
ACPT
SLC25A22
EEF1E1
C12orf54
PGPEP1L
NADSYN1
ZNF554
GRIK3
GOT1L1
STAM2
GBGT1
PGM3
GYS2
GYS1
GNPDA2
G6PD
GNPDA1
PIGQ
AMDHD2
SLC13A3
PLP1
LCT
TES
CSTB
ASPA
RIMKLB
MTR
MTHFS
MTHFD2
MTHFR
MTHFD1L
MTHFD2L
ASL

## Sheet: Genecards
CFTR
TERT
MET
HNF1B
RTEL1
ACE
NPHP3
VHL
TGFB1
PAX2
REN
PKD1
CEP290
RET
SLC4A1
TMEM67
KIF21A
CLCN5
PARN
FH
AGT
CFTR-AS1
NPHP1
LOC111674472
EGF
CC2D2A
RPGRIP1L
AGTR1
MTOR
ATP6V1B1
SLC4A4
FLCN
NPHP4
LOC110806263
PKHD1
GATA3
TP53
SLC2A9
SFTPC
TERC
NPHP3-ACAD11
HNF1A
MUC1
LOC111674475
TTC21B
WDR19
PKD2
SLC22A12
NEK8
TSC1
ATP6V0A4
ATM
INVS
WT1
UMOD
CCN2
SETD2
TNF
CLDN16
HFE
ALB
VPS33B
SLC22A5
IL6
IQCB1
LOC111674477
SLC5A2
TMEM216
IFT140
TUBB3
INPP5E
SDCCAG8
PHOX2A
SERPINA1
HMOX1
B2M
IFNG
LOC113664106
CLDN19
ITGA8
VEGFA
IFT172
MKS1
FHIT
ABCA3
DSP
FXYD2
TSC2
CTNNB1
CAV1
AHI1
CA2
MITF
EDNRA
VIPAS39
UPK3A
NPHS1
BSND
TMEM231
OGG1
SLC9A3
RRM2B
TMEM237
SCNN1A
FN1
AQP2
FAM13A
INS
SCARB2
PTEN
HLA-DRB1
FCGR2A
MIR21
EP300
PIK3CA
SLC34A1
B9D2
TCTN2
LOC113633877
IL10
MIR141
SCNN1G
SIX1
B9D1
STN1
CSPP1
OFD1
EDN1
HIF1A
EPO
CDH1
DYNC2H1
COL4A5
CRP
APOL1
FGFR3
TRAF3IP1
TCTN3
MIR200C
STX1A
FGF23
MMP9
CCL2
CXCL8
SCNN1B
TMCO1
OCRL
SERPINE1
MIF
SPP1
COL4A3
APOA1
CLCNKB
HGF
WDR35
BICC1
RFH1
TCTN1
TFEB
IL1B
COL4A4
FRAS1
DCDC2
SARS2
LYZ
BMP4
CCND1
NPPA
CASR
EGFR
CEACAM3
IL2
KCNN4
DPP9
SLC12A3
SDHB
LMX1B
IFT122
IL4
NPHP3-AS1
MKKS
AKT1
STAT3
CEP164
MMP2
STAT1
NPHS2
IL1RN
SLC9A3R1
SLC26A9
DNAJB11
NR3C2
C12orf29
GSN
HPS5
SLC6A14
ANKS6
THBD
TIMP1
HPS6
IFT80
ARL3
GSTM3
C3
MME
TMEM138
NONO
MMP1
SLC12A1
KL
BRAF
ABCB1
SMAD4
NDUFAF6
CCR6
FGA
SLC11A1
TTC21B-AS1
KCNJ1
KRT18
CEP120
CFH
HPS1
ENG
GCLC
LOC105371046
BBS10
ICAM1
GLIS2
TLR4
NFE2L2
HS2ST1
BMP6
AVPR2
BRCA2
IGF2
NLRP3
KRT7
KIF7
ELN
ALMS1
LRP2
IFT43
FAS
CEACAM6
VIM
INF2
GATM
IGF1
KIAA1109
CLCA4
FASLG
ZNF423
KIAA0586
ARL13B
CP
NOS3
CD2AP
CLTC
XPNPEP3
BBS4
LDHA
PPARG
CPLANE1
FGF2
DZIP1L
ACTN4
IL13
NAGLU
BBS2
FOXI1
TMEM260
PBX1
HNF4A
CEP83
RMND1
BBS1
APOE
IFNA1
CDKN2A
ABCB4
GNAS
NEK1
H19
LCN2
KYNU
MT-TL1
WDR72
CSF2
SMAD3
NHLRC2
PDGFRA
CD36
HPS3
SALL4
IRF5
CEP41
PRKAR1A
MEFV
GPC3
BBS5
PDGFRB
NPPB
CTLA4
CST3
EHHADH
APC
ABCB11
PHEX
GLA
JAG1
FGFR1
IL18
SEC61A1
CXCR3
BGLAP
PRTN3
MDM2
POLE
JUN
ALG9
VDR
SUFU
BMP7
GREM1
HPS4
GEMIN4
AQP1
BBS12
MMP7
RPGRIP1
NHP2
KAT6B
DIRC1
GANAB
NUP107
CA9
KIT
PTGS2
CDC73
SRC
CUBN
SOX18
TUBB2B
EBF3
PAX8
ELANE
TBX18
TTC8
MPO
TTR
DIS3L2
IGFBP3
TTC26
CALR
TRPC6
IFT27
SMAD2
COL4A1
SLC34A3
HRAS
BCS1L
MAPKBP1
TMEM107
BBS7
CTNS
SLC7A7
HSP90AA1
CFHR5
MIR199A1
IL2RA
TINF2
LOX
TMEM127
TUBA1A
TXNDC15
AGTR2
DNASE1
CHD7
CDKN1B
BBS9
VPS45
CLCN1
PTPRO
GSTP1
CCL5
SMAD7
CLCNKA
GGT1
ACTB
TNFRSF1A
APRT
IFNA2
MYH9
SLC2A2
RBP4
WNT4
SFTPD
IL17A
CEP104
CD4
CXCL10
S100A1
LGALS3
AGXT
DTNBP1
SMARCAL1
DYNC2I1
PTH
NOTCH2
MIR155
ERBB2
FAN1
SGK1
EVC2
MBL2
LOC107548112
SPINK1
GLIS3
CFHR1
KRT19
KCNJ11
ITGA3
KRAS
DYNC2I2
EPAS1
MIR192
SHH
PTCH1
KRT8
APOB
JAK2
HLA-B
ENPP1
C2CD3
FGFR2
BAP1
FANCD2
CFI
SNAI1
IL5
XDH
NOP10
SDHC
ACP5
TLR2
F2
HPRT1
IL1A
ADIPOQ
NUP133
NRIP1
BCL2
DEFB1
NOS2
NOX4
ROBO1
VCAM1
KDR
COL1A1
LAMB2
NKX2-1
COQ8B
SLPI
SLC22A6
MYO5B
SLSN3
GLI3
EPCAM
SDHA
CRB2
MSH2
STAR
CCL3
CASP3
GPT
DKC1
SLC26A4
MT-ATP6
CD274
NRAS
TF
HP
C12orf60
ATP8B1
PDPN
HLA-A
SLC3A1
PDCD1
KIAA0753
MFF-DT
LEP
MIR30A
AMBP
S100A8
F3
GRHPR
MIR34A
AGER
TRPV4
MAPK1
CXCR4
PRKCD
NOTCH1
CD80
IL1R1
PMS2
PDGFB
PIBF1
SLC2A1
TGFBR1
CXCL9
HBB
PEX1
FGF10
PIK3C2A
CA3-AS1
APOA1-AS
SOX9
CSF3
ADCY10
PLG
CA12
GSTM1
VPS33A
KNG1
NF1
ABCC8
ARL6
MYC
CYP11B2
SLIT2
CPT2
CALCA
HAMP
HSPG2
LMNA
MIR17
MAPK3
TJP2
SDHD
ZMYM2
KCNQ1
TP63
FOXP3
ABCC1
PMM2
ZEB2
TGFA
FGF8
LCAT
CD46
KATNIP
TIMP2
MIR140
IFT52
CDKN3
MAGI2
COQ2
ELOC
PEX2
FLT1
ADRB2
EZH2
HNFJ3
SLC6A19
CD44
PDE6D
ANXA2
BRCA1
PRKCSH
TGFB2
PAX6
MMACHC
SEC63
MIR126
PON1
TOGARAM1
S100A9
CCL11
FAH
THBS1
ABCG2
AQP3
PVT1
BBIP1
NR1H4
IFT74
MAPK8
LZTFL1
SOD2
NUP93
CDH16
FBN1
MIR93
ARMC9
CHI3L1
ANGPT2
GPC4
PEX6
TRIM32
WDPCP
MIR15A
CA4
TGFBR2
KAAG1
CD34
SMARCA4
CD8A
MIR106B
SLC37A4
GAPDH
SLC17A5
TMEM218
MTHFR
ITGAM
HMGB1
CD40LG
FGF7
FANCB
PEX5
MPL
MMP3
SIRT1
YAP1
MIR204
TET2
TNFSF10
HOXD13
CASP8
ANOS1
GCK
ALOX5
SFTPB
PRSS1
MIR214
IL33
KCTD1
MIR145
COL1A2
PTPN11
SLC40A1
HYLS1
PTPN22
VEGFC
PHKG2
HAVCR1
HSD11B2
KCNJ10
DACT1
PEX10
SERPINH1
ANLN
RARB
CSF1
TOLLIP
EVC
TFAP2A
ADAMTS13
RAF1
MAX
KCNQ1OT1
PTPRC
BIRC5
IL15
SLC12A2
HLA-G
MYO1E
ITGB1
PRSS8
BLOC1S5
ADM
HOGA1
ACE2
TNFRSF11B
MIR200B
HFE-AS1
ATP6V1B2
PDGFA
GC
TNXB
GBA
RAB11A
ARHGDIA
MEG3
CFAP418
DHCR7
MLH1
MTMR10
STK11
SOX17
RYR1
CXCL12
SREBF1
ACTC1
PDX1
CCL4
WRAP53
MIR29C
DCHS1
WNT5A
FUZ
AFP
EZR
FBXW7
CD79A
RHOA
APOA2
MUC5AC
RAD51C
HSPA5
TRIM28
TGM2
PLCE1
AXL
VWF
SIX2
PEX3
MYOD1
SOD1
ARG1
MALAT1
TGFB3
COPA
FANCC
DUSP29
SLC25A13
PROKR2
SERPINC1
BCL2L1
GUCY2C
MIR142
DYNC2LI1
MIR221
MEN1
SPRY2
IL12A
MYO5A
NOD2
GDNF
KANK1
MPI
CEP19
LIPA
ADORA1
HJV
MIR27A
COL3A1
CBY1
TALDO1
ATP12A
LAMA3
BSG
NEUROD1
REST
IGF1R
TRPM6
DNMT1
CXCR2
PECAM1
G6PC1
HSPA4
WFS1
IGFBP5
PTHLH
PEX19
LBR
COQ6
GUSB
TRIM8
MKI67
CD40
FAT4
BTNL2
TYMP
FANCI
RNASE3
MSH6
KEAP1
MIR122
SLC6A20
BLOC1S5-TXNDC5
EEF1E1-BLOC1S5
PVALB
MIR200A
ABCC2
PHKA2
CR1
SLC9A3R2
RPL5
IL9
HOTAIR
MIR143
LARS1
RASSF1
EPOR
CLDN10
ANXA5
CDKN1C
DAAM2
KIRREL1
CLDN7
RHEB
MYCN
OSGEP
IL13RA2
ACTA2
TRIM59-IFT80
CXCL2
SPARC
MMP8
HSPA8
NDUFS7
CCR5
NUP85
SETBP1
GNA11
SURF1
CXCL1
MASP2
SELE
KRT20
CCL18
RB1
CYP1B1
CLU
KLF11
MT-CO3
MICALL2
BRIP1
SELP
HSPB1
SAA1
GALNT3
TBC1D8B
BRD4
RBSN
DAB2
PEX13
RPL36A-HNRNPH2
ALG8
SH2B3
MT-ND4
GATA1
CCR2
MIR26A1
CCL17
MIR222
DICER1
CYP1A1
HLA-DPB1
MT-CYB
NUP205
WNK4
DVL1
POSTN
LRP5
TLR9
CLCN4
SLC5A1
MT-ND5
CYP3A5
PARP1
PRKCA
H2AC18
DLL4
CD86
SLC34A2
RUSF1
SUCLA2
ATP1A1
DES
GZMB
SLX4
NPM1
PROK2
AP3B1
PCNA
BMPR2
MT-ND6
ATRX
ACVRL1
BAX
STAT4
CXCR1
SGPL1
RAD51
FANCA
FIBP
KIF1B
MAD2L2
C4A
MIR196A1
DNAJB1
LRRC56
FLT3
WDR73
CFB
CYP27B1
ITGB4
HAVCR2
PNPLA6
NOS1
CASP9
TEK
UTP4
ATF6
TNFRSF10B
LDLR
TOP1
DNAH8
PIEZO2
TNNT2
FAM149B1
CLCA1
ADORA2B
GPR35
FLT4
CCL22
MUC4
MIR23B
DDIT3
EIF2AK3
LTF
SF3B2
HS6ST1
DDR1
ELOB
MIR210
EMP2
CLCN7
HSPD1
ANTXR1
MIR181A1
PCSK9
SRGAP1
MIR150
MIR185
POU6F2
PLEC
LAGE3
CHUK
BLK
ZIC3
EDNRB
VIP
NSD1
SYNPO
NUP160
IARS1
LACTB
SP110
MIR195
INSL6
ACD
ADA
SLC4A7
NOS1AP
GRP
IFT88
TNFSF11
SDHAF2
CLCN3
TLR5
SPTAN1
UQCRB
TGM1
MBTPS2
PAX4
MRE11
BMP2
KIAA0319L
INSR
GATAD1
MAPK14
SLC30A7
ALDOA
GAL3ST1
PLCH2
GJB2
S100A4
MST1R
RGCC
ELAVL1
XIAP
CDK4
MIR1225
ALDOB
SST
SEMA4D
TUG1
PRL
CFLAR
ALAD
KIF24
KCNJ16
BAAT
CUL3
DERL1
SCGB1A1
LIFR
MMP12
ENPEP
PTX3
INTU
ARHGAP24
MARS1
MSLN
ERN1
MUC6
PNPLA3
SLC26A3
GPD1
FABP1
MIR144
KANSL1
ANPEP
ARAF
POLG
MST1
CDKN1A
MT-ND1
PFKFB3
ICOSLG
ILK
PEX16
BMP1
RAB5A
SOCS1
CAT
NR5A1
STUB1
PRKACA
KDM4C
GBE1
APEX1
NFKB1
PDZK1
UQCC2
XRCC2
ABCD3
APPL1
NBEAL2
MIR22
ERCC6
TIMP3
NIPBL
ABCG5
PEX14
ABCC4
FADD
GSTT1
CYP3A4
PTGS1
NAT2
C12orf57
ENO2
TCF4
KIF3A
PPARA
NF2
SFRP1
PEX26
PEX12
GAS5
LOC106501713
DCN
MIR29A
CANX
PLIN2
TXN
GLI1
CDH2
GNRH1
IL3
CSF1R
PKM
BPI
STAT5B
DYNLT2B
HDAC8
FANCM
CCR7
CXCL5
NBAS
F5
SLC17A1
SF3B1
PGF
ADA2
RPS27A
PSMB8
SP1
MIR224
ENPP2
DNAJC5
CHGA
KIF3B
MT-ND3
FANCG
MIR223
MIR18A
TPRKB
MRPS7
ESR1
MIR29B1
RBPJ
LOXL2
NPY
ABCC6
JAK1
PSMB9
MIR101-1
MT-CO1
KLHL3
AVP
MIP
TNNI3
RETN
HLA-DQB1
VCP
HMGA2
MIR494
YY1AP1
MIR19A
CALB2
IDO1
CCR4
CCN4
HPSE
GATA4
CCNB1
FARSB
ASTN2
SPINT2
THPO
TTC37
RAB8A
DPP4
CHRNA3
CAMP
HSD3B7
IL17F
WNT11
HIF1AN
VEGFD
XBP1
HOXA13
LPAR1
SMPD1
TGIF1
IGFBP1
EMX2
PARK7
GLI2
U2AF1
BLOC1S3
PATJ
PODXL
TFAP2B
TYR
KRT13
CYP1A2
CCR1
IFRD1
PLAU
CTSG
HLA-DQA1
COMT
MT-TK
SKIV2L
VDAC1
MT-ND2
P2RY1
MB
CCDC28B
HMGCR
SKIL
APOC3
MAP2K2
ENTPD1
NR0B1
BCR
PITX2
SPHK1
LIMK1
DLST
CACNG2-DT
YWHAE
TTN
NLRC4
EGLN3
TP53RK
MIR182
MIR31
ARSB
AHSG
MAGI2-AS3
WNK3
PLAT
STC1
TBX1
HDAC2
CHN1
ROR2
MSR1
ANXA1
CLTRN
USH2A
MIR25
GUCA2A
MLXIPL
MIR212
PRKAG2
ADCY6
NKX2-5
GJB1
GRK2
MIR9-1
ANO1
COL4A6
NCF1
SLC12A7
MIRLET7A1
EGR1
NTS
PSMD12
LPA
CAPN10
LIG4
MIRLET7D
ADGRG2
CEL
SLC22A8
MDH2
CDC42
EIF4EBP1
IL2RB
TJP1
AKAP13
MMUT
MT-TE
MIR138-1
ASL
MAP2K1
BMPR1A
ARFGEF1
SOST
STAT6
THG1L
RNU4ATAC
SCN5A
RASGRP1
DVL3
YY1
CLDN1
CASP10
OSTM1
KANK2
PRODH
WNT9B
ZDHHC24
AP1S1
LPL
BDKRB2
MIR193A
PSMC4
EPHA2
STRA6
HSPH1
MIR34C
COL7A1
TNFRSF1B
MUC3A
WNK1
GOPC
EPHX1
GTF2I
AURKA
KLK1
C11orf65
PRKG1
TRAP1
NR3C1
TREX1
RBX1
RAB11B
TAP1
IFT57
BIRC7
ADD1
PACS1
IL12RB1
NDUFS4
DLL1
FOLH1
WNT7B
WNT3
LEPR
TKT
PAH
AKR1B1
ITGA6
UCA1
DKK1
THY1
MT-CO2
KITLG
SERPINB1
PCK1
FIP1L1
FOS
FAM20C
AHSA1
CRNDE
MUTYH
SCO2
LAMB3
RAB7A
BLM
SEMA3A
B3GAT1
WDR4
TUBB
AR
PSMD4
POR
MIR130A
FURIN
CTAG1B
KDM6A
CD70
NNMT
MIR328
PTRH2
FLNA
HLA-DPA1
CRYAA
MIR135A1
F2R
GALK1
MIR15B
CD28
DNMT3A
CSK
TNPO3
COG6
ASPM
KMT2D
LNCARSR
DEFB4A
LBP
CLDN4
LAMC2
NEK9
NEU1
SLC4A2
EDN3
TUBB2A
TNFSF15
MIR146A
CRYAB
SLC25A11
MIR99A
BDNF
SP140
AQP4
GFRA1
SLC4A5
PSMC6
ALDH2
FOXC1
STX16
LINC00963
MIR590
MT-TW
RFC2
ARNT
TUBB1
CYCS
CASP1
FLI1
IFT20
MIR139
CD247
SART1
HSD17B4
ERLIN2
EGLN1
SLC41A1
CLCN2
MGME1
SNCA
MIR99B
ATP7B
CYP11A1
TRRAP
BLOC1S1
SPPL2C
CHRM3
ACTG2
RAD21
COL2A1
MIR181A2
ANXA6
UBC
SLC22A11
LNX1
PSMC5
VCL
SLC26A6
GAS6
SLC51B
PEX11B
ADAMTS9-AS2
PIK3CG
TPMT
DGUOK
PTGDS
PROM1
MIR149
DYRK1A
APCS
LPO
CASC2
PSMB3
P2RY2
APOA4
PSMA5
MIR490
MIR10B
MGP
TFR2
RNF5
PSMA1
LAMP2
SHROOM3
NEDD4L
AXIN2
SLC13A2
RPS19
MIR424
PSMB5
POMC
ITGB3
CTNNA1
CYP21A2
TLR1
COL14A1
PSMD1
KIF17
DGCR5
AKT3
BARD1
F2RL1
MMP14
DMBT1
CD151
MYH11
ZNF592
IFIH1
ATP6AP1
ACADVL
MIRLET7G
PTH1R
BDKRB1
MIR296
SLC22A2
MYRF
CREB1
MIR423
MYH10
SERPINF2
AAGAB
XRCC1
SPECC1L
SERPINA3
GAPVD1
CELA3B
RPGR
MASP1
TPBG
LUCAT1
PYGM
ACOX2
PSMD2
MIR532
WWTR1
DIPK1A
NAA10
SEC23B
GTF2IRD1
BAZ1B
FLII
TFRC
CCAT1
PSMB1
ALPL
LINC00473
MIR335
FKBP6
SRY
ATP4A
PSMD11
HSPA1A
TULP3
EIF4H
NOTCH3
PIGY
PSMB4
BCL7B
MECP2
TRB
LINC-ROR
KARS1
UTS2
ROCK1
CNR1
AP2S1
PSMD8
PANDAR
EWSR1
GH1
C5
MIR320A
VANGL1
PSMA3
NDUFS2
EXT2
MEPE
CYP7B1
ZNF148
MTX2
NPNT
SOD3
ERLIN1
GTF2IRD2
METTL27
IFNL3
SPRY4-IT1
TWIST1
SCT
REG3A
PTK2
RCBTB1
ABCF2
MIR338
FOXE3
PSMA6
TNC
CD14
NCAPG2
MIR885
CCL26
STING1
BIRC3
AQP5
CYTOR
CD82
GHRL
LTA
ANKFY1
SOCS3
PSMA8
MRPS22
FTX
PLA2G2A
VTN
MYD88
TCIRG1
MYLK
CYS1
PSMA4
SDC1
CCAT2
SCAPER
ABCG8
CD163
PGR
PCBD1
CPT1A
PSMA2
RAB7B
PYGL
PSMB2
PSMC3
SIGLEC5
ACSL4
PLAUR
ETFDH
PTENP1
GNB1
PSMC2
CLEC7A
CYP2E1
PSMA7
C1QA
BUD23
APOH
HABP2
CREBBP
TBL2
ARX
CLIP2
USP9X
LPIN1
PSMD3
MRC1
TNFSF13B
DNASE1L3
FGF1
PSMD7
PSMD14
PDZD3
KCNK3
ONECUT1
MIR211
AKR1D1
BUB1B
TUBG1
LAMP1
ERBB4
KCNJ2
NR1I2
EPX
ATD
MAPK10
CCN3
IGF2R
AMMECR1
PRR5
LYST
RHO
PRKG2
GDF11
DERL2
DANCR
MIR377
IL9R
AGK
SHC1
PCK2
COG1
MT-TF
HSPE1
GJA1
SSBP1
NUP37
RPS6KB1
ARHGAP31
SLC7A11
ETFA
MIR20A
KRT14
ERCC1
LEPQTL1
UNC45A
PSME2
PC
CCP110
GDF15
CDH5
BNIP3
TRPM7
WASHC5
UBD
STXBP2
TAC1
FSHR
PIEZO1
VPS37D
GSR
G6PC3
MIR203A
ERAP1
SFRP4
MMAA
NPPC
BPIFB1
PRKD1
FOXD1
TTBK2
CTC1
DMD
ALG1
PPARGC1A
ZNF699
MIR125A
ETFB
IGFBP2
PRDX1
WDR62
DNAJC30
PI3
ANO5
NPTN-IT1
C4B
CEP152
FOXE1
MTTP
TMEM270
DCT
POLD1
CEBPB
GAST
GJC1
NOTCH4
KMT2C
STS
NR1I3
MYH6
KCNJ5
GPER1
SKI
FOXF1
LOC107133510
CYP11B1
UBE3A
BLOC1S4
KRTCAP3
YWHAQ
SCN1B
COL5A1
INPP5B
UCP2
ASAH1
FKRP
AXIN1
PRG2
STK39
FCGR3B
SLC30A9
TWNK
HBEGF
FCGR2B
MYOCD
CDKN2B
ANGPT1
MIR708
ADAMTSL1
CNTLN
UQCRQ
FIG4
CETP
UBE2J1
SFTA3
VAC14
LOC106099062
GFAP
SLC26A8
ABCB7
ELP1
MIR483
CX3CR1
CDH23
DEFB103B
MIR30E
SYP
EDN2
ITGAV
TMSB4X
SLC51A
UCHL1
DEAF1
PXN
USF2
JPH2
PF4
MIR519D
CD55
CEP97
PHGDH
CCL7
POT1
CLDN3
BLOC1S6
TMEM199
STX3
FAP
WRN
SLC22A18
MAP3K7
FLRT3
IGHE
ADORA2A
TNFRSF6B
SQSTM1
COLEC11
IL4R
FKTN
CADM1
RCN1
GALE
PLOD2
CHIT1
PGK1
C1QBP
ESCO2
SCTR
MAPKAP1
POU2AF1
TRIM21
AP3D1
ACTN2
FOXM1
EPG5
CDK5RAP3
LOC106627981
HLA-C
TLR3
UGT1A1
RAC1
COG7
SLC29A3
SLC15A2
EFEMP1
MIR216B
CYP19A1
PIK3CD
KCNE5
DRAIC
ZFPM2
CTSL
LECT2
SCLT1
GON7
F13A1
PRKCZ
MED13L
RTTN
F10
AGL
POMT1
SPRY1
PCAT29
C5AR1
SMC1A
COPB2
MIR378A
NRP1
XRCC3
ETV6
RCC2
UQCRC2
KCNA1
IDH1
TGFBR3
SLC13A1
XRCC4
TNFAIP3
LRRC37A2
SLC35D3
MAGEA4
AIM2
MPV17
NEDD9
MIOX
IL7
PIGT
APEH
CAD
ETS2
ZIC2
IL6R
APOC2
SEC24C
RPE65
TUBB4A
ABL1
PAX7
MYL9
CCK
TUBB4B
NARS2
IL12B
DLC1
SERPINA7
KCNJ13
GCG
SIX3
TUBB6
RAD50
CYP2D6
FOXO1
LMOD1
OCLN
WFDC2
CD63
TCF7L2
IFT46
MAP1B
FGF21
DHCR24
NME1
XYLT1
CDK6
TBX3
OXT
SMARCC2
RECQL4
IFNGR1
SLC12A4
CDK5RAP2
WDR81
MT-TS1
IL7R
CMA1
TAP2
SAGE1
NT5E
ASS1
LIPC
DDRGK1
IGFBP4
IL11
LOC110006319
SMC3
LGALS9
GSK3B
DPM1
PLIN1
DOCK6
ROBO3
CD209
TOP2A
MAGEA3
TRIM37
IFT81
PLXNC1
CEP63
PRF1
CTSD
FCGR3A
MIR191
PRKCB
ADK
CCN1
KCNAB2
LTBP4
TLR7
FTO
SOX11
GCDH
MIR1202
PIGO
GATA2
ADAMTS9
VPS16
DRD2
RPL35A
NCAM1
LEMD3
TOE1
RNU7-1
RPL11
AARS1
DUSP6
RPL15
MCL1
CDH11
ABCC9
G6PD
SELL
KIF20A
PNPLA2
IMPDH1
TTC19
OXA1L
RAB3GAP1
RPL3L
CD9
ARSA
FLNB
MIR342
SEMA3E
MRTFA
UBAC2
COL4A2
PSC
SS3
JAK3
RPS26
ADAM19
NEAT1
CLPB
RELA
CENPJ
NFKBIA
HSD3B2
EMC10
RPL26
NR0B2
FREM3
CACNA1S
STXBP1
CYP2C9
GHR
SI
TM6SF2
ABCB6
[truncated: 4,774 more rows]

## Sheet: Intersection target
AKT1
CDK5
HRAS
JUN
RHOA
SLC2A1
GLA
MMP2
CAT
GFAP
SORT1
TP53
GRIN2B
APP
BAX
DLG4
NOS3
IGF1
FOS
VAMP2
BCL2
TGFB2
ENG
TH
PPT1
NPY
IL6
SOD1
GNRH1
PRL
CASP3
LEP
CALM1
TGM2
PDC
CREB1
CFTR
NR3C1
ASS1
CALB1
S100B
BCL2L1
MAPT
CS
NGF
FGFR1
MITF
BDNF
ASNS
DLD
HMOX2
CLC
NFKB1
SLC10A2
SNAP25
CAMK1
ABCB1
ANPEP
CA4
ACHE
PLA2G1B
GDNF
IDH2
ADORA2A
PLCB1
TAT
PHEX
AQP4
GSTP1
GCG
GCA
DECR1
OXA1L
ADCY8
CYCS
TAC1
CBS
AKAP9
LDHA
CD38
ARG1
GLUL
GFPT1
ACTN2
PC
GAD2
HSD17B12
GPT2
GAD1
OAT
SYP
RASA1
GRM5
GSTM1
KRIT1
MSN
CACNA2D1
BIRC5
CNR2
AIMP1
NGFR
EGR1
GGT1
EEF1A2
ENPEP
NDUFB11
EEF2
ASPM
GAPDH
LIF
TACR1
NOS2
KL
RBFOX3
AIFM1
AIMP2
LDHB
MDH1
NT5E
HIBADH
GGCT
LDHAL6A
MDH2
SHMT2
PRODH
FH
GSTO1
SDHB
GPT
PVALB
SST
SLC7A11
DHFR
CSF3
SLC16A1
MGST1
CDKN1B
AVP
HMBS
GSTT1
GGH
GSTO2
FPGS
NOS1
RNF213
HTR3A
DRD2
OTC
GSS
GCLC
PHGDH
TGFB3
FOLH1
NLRP1
BCKDHA
CASP9
CHAT
P2RX2
NME3
NME4
IMPDH1
COMT
HCRT
IMPDH2
GRM3
HTR1A
HTR1B
NTS
OGDH
DRD5
HPD
CAMK2G
SLC6A1
CALB2
DTNBP1
SLC38A2
BCKDHB
ARG2
SLC25A13
GLUD1
FTCD
NAGS
ALDH18A1
PSAT1
PFAS
PLCB3
GCDH
BAMBI
F2
UROD
TRPV1
GLS
SPTBN2
SLC1A7
GCLM
SLC1A4
GOT1
ALDH5A1
SLC25A12
AMDHD1
SLC25A22
STAM2
PGM3
GYS1
G6PD
PLP1
TES
CSTB
ASPA
MTHFR
MTHFD1L
ASL
