# Supplementary material for: Exploring the mechanism of Shendi Bushen capsule in anti-renal fibrosis using metabolomics theory and network analysis
Source: Royal Society of Chemistry journal article supplement (doi:10.1039/d2mo00141a), 2022-08-15
Supplement: d2mo00141a9.xlsx [file d2mo00141a9.xlsx]

## Sheet: Sheet1
Week	Urine Output(ml)
	C	M
1	14.11±6.90	12.20±3.96
2	16.11±10.36	10.40±3.51
3	17.50±6.38	12.80±4.33
4	16.00±6.80	13.97±5.51
5	14.89±10.86	10.67±5.20
6	18.56±11.22	12.00±7.09
