# Supplementary material for: Exploring the mechanism of Shendi Bushen capsule in anti-renal fibrosis using metabolomics theory and network analysis
Source: Royal Society of Chemistry journal article supplement (doi:10.1039/d2mo00141a), 2022-08-15
Supplement: d2mo00141a10.xlsx [file d2mo00141a10.xlsx]

## Sheet: Sheet1
Group	ALB(ug/ml)	Scr (umol/l)	BUN (mmol/l)
C	58.33±3.82	43.45±5.90	6.15±0.77
M	88.99±9.84 ***	63.12±7.85 ***	9.81±1.43 ***
P	<0.0001	<0.0001	<0.0001
*p < 0.05, **p < 0.01, ***p < 0.001 significant difference compared to the control group.
