# Supplementary material for: Exploring the mechanism of Shendi Bushen capsule in anti-renal fibrosis using metabolomics theory and network analysis
Source: Royal Society of Chemistry journal article supplement (doi:10.1039/d2mo00141a), 2022-08-15
Supplement: d2mo00141a11.xlsx [file d2mo00141a11.xlsx]

## Sheet: Sheet1
NO.	m/z	Retention time (min)	VIP	Compound ID	Formula	compound
Positive ion model
1	154.99	0.32	4.77	HMDB61120	C5H6N2O4S	3-Hydroxy-4-aminopyridine sulfate
2	150.06	1.01	1.1	HMDB02287	C4H7NOS	Homocysteine thiolactone
3	230.12	1.09	1.01	HMDB06372	C3H6O4	L-Glyceric acid
4	141.07	1.13	1.81	HMDB29061	C6H12N2O4	Threoninyl-Glycine
5	162.08	1.16	1.11	HMDB11690	C7H9N5O	7-Aminomethyl-7-carbaguanine
6	242.11	1.35	4.43	HMDB28706	C9H19N5O3S	Arginyl-Cysteine
7	483.22	1.35	2.45	HMDB12607	C21H31NO7S	18-Carboxy-dinor-LTE4
8	199.11	1.64	1.95	HMDB29069	C9H16N2O4	Threoninyl-Proline
9	420.14	1.85	1.6	HMDB01354	C20H21N7O6	5,10-Methenyltetrahydrofolic acid
10	130.53	10.05	1.33	HMDB01254	C6H14NO8P	Glucosamine 6-phosphate
11	183.15	10.64	1.26	HMDB13076	C10H20N2O2	Spermine dialdehyde
12	149.02	10.66	1.22	HMDB02334	C8H6O4	Benzoquinone acetic acid
13	190.05	10.66	1.39	HMDB00978	C10H9NO4	4-(2-Aminophenyl)-2,4-dioxobutanoic acid
14	128.11	10.7	2.32	HMDB06831	C7H15NO2	3-Dehydroxycarnitine
15	243.02	10.7	1.55	HMDB01078	C6H13O9P	Mannose 6-phosphate
16	439.23	2.33	1.52	HMDB12496	C23H37O7P-2	1-Lyso-2-arachidonoyl-phosphatidate
17	240.12	2.96	1.87	HMDB02042	C11H13NO3	3-Phenylpropionylglycine
18	146.06	3.27	1.05	HMDB04186	C9H9NO2	3-Methyldioxyindole
19	244.03	4.34	1.77	HMDB00962	C8H15NOS2	Lipoamide
20	364.18	4.94	1.02	HMDB06772	C19H24O3	Adrenosterone
21	319.17	5.05	1.06	HMDB28824	C11H20N3O5-	Glutamyl-Lysine
22	251.18	6.49	1.14	HMDB02004	C13H18N2O	5-Methoxydimethyltryptamine
23	241.11	7.16	1.05	HMDB12127	C11H12O4	(R)-2-Benzylsuccinate
24	274.27	9.27	1.15	HMDB01140	C8H16O	Octanal
25	198.02	9.57	6.17	HMDB06802	C4H10NO7P	O-Phospho-4-hydroxy-L-threonine
26	183.01	9.58	5.79	HMDB41785	C8H10O5S	Tyrosol 4-sulfate
Negative ion model
1	124.96	0.55	1.47	HMDB11111	C3H4O3	Malonic semialdehyde
2	258.07	0.7	1.2	HMDB28972	C10H17N2O5S-	Methionyl-Glutamate
3	503.08	1.04	2.1	HMDB00289	C5H4N4O3	Uric acid
4	264.99	1.06	1.73	HMDB01343	C6H13O7P	Mevalonic acid-5P
5	197.02	1.07	1.5	HMDB00355	C6H10O5	3-Hydroxymethylglutaric acid
6	128.04	1.09	5.2	HMDB00148	C5H9NO4	L-Glutamic acid
7	238.04	1.14	1.3	HMDB28819	C7H11N2O5-	Glutamyl-Glycine
8	866.24	1.14	1.21	HMDB12266	C11H15NO8	N-Succinyl-2-amino-6-ketopimelate
9	160.06	1.17	1.1	HMDB02030	C6H13NO5	Fructosamine
10	524.13	1.17	3.4	HMDB00812	C6H9NO5	N-Acetyl-L-aspartic acid
11	155.05	1.28	3.2	HMDB00854	C6H10N2O4	Formiminoglutamic acid
12	310.1	1.39	1.52	HMDB29076	C14H17N3O3	Tryptophyl-Alanine
13	116.93	10.05	8.59	HMDB01448	O4S-2	Sulfate
14	131.03	2.24	2.23	HMDB12325	C5H10O5	Arabinofuranose
15	327.07	2.51	2.23	HMDB00052	C10H18N4O6	Argininosuccinic acid
16	425.04	2.51	1.5	HMDB12220	C18H16N2O8	Dopaxanthin quinone
17	155.04	2.76	2.44	HMDB59606	C5H12NO2+	Trimethylammonioacetate
18	240.05	2.86	1.35	HMDB13318	C11H13N3O	Tryptophanamide
19	204.03	2.91	2.95	HMDB00017	C8H9NO4	4-Pyridoxic acid
20	188.04	3.2	1.57	HMDB04290	C8H9NO3	Iso-pyridoxal
21	371.1	3.46	2.1	HMDB01425	C18H22O5S	Estrone sulfate
22	273.01	3.61	3.81	HMDB12208	C6H11N2O6P	D-Erythro-imidazole-glycerol-phosphate
23	271.05	3.71	1.1	HMDB01200	C11H12N2O4	N'-Formylkynurenine
24	349.11	4.07	1.6	HMDB29007	C18H20N2O4	Phenylalanyl-Tyrosine
25	155.07	4.13	1.5	HMDB00893	C8H14O4	Suberic acid
26	183.07	4.54	5.6	HMDB00895	C7H16NO2+	Acetylcholine
27	249.14	4.66	1.3	HMDB28931	C12H20N4O3	Leucyl-Histidine
28	256.12	5.1	2.1	HMDB13130	C12H21NO6	Glutarylcarnitine
29	203.13	5.76	2.25	HMDB03543	C4H8O	Butanal
30	385.18	5.89	1.2	HMDB02341	C20H30O5	8-iso-15-keto-PGE2
31	186.06	6.83	1.4	HMDB06044	C9H11NO2	Norsalsolinol
32	183.1	8.89	1.7	HMDB00792	C10H18O4	Sebacic acid
33	285.05	9.31	1.12	HMDB02012	C14H18O4	Ubiquinone-1
