# Supplementary material for: Exploring the mechanism of Shendi Bushen capsule in anti-renal fibrosis using metabolomics theory and network analysis
Source: Royal Society of Chemistry journal article supplement (doi:10.1039/d2mo00141a), 2022-08-15
Supplement: d2mo00141a12.xlsx [file d2mo00141a12.xlsx]

## Sheet: Sheet1
NO.	Pathway	Total	Hits	Metabolites	Raw p	-log(p)	Impact
1	One carbon pool by folate	9	1	5,10-Methenyltetrahydrofolic acid	1.2882e-07	15.865	0.17486
2	Amino sugar and nucleotide sugar metabolism	88	2	Malonic semialdehyde, Glucosamine 6-phosphate	8.4618e-07	13.983	0.06961
3	Fructose and mannose metabolism	48	1	Mannose 6-phosphate	1.0752e-05	11.44	0.05129
4	Glyoxylate and dicarboxylate metabolism	50	2	5,10-Methenyltetrahydrofolic acid	7.4858e-05	9.4999	0.14161
5	Vitamin B6 metabolism	32	3	O-Phospho-4-hydroxy-L-threonine, 4-Pyridoxic acid, Iso-pyridoxal	0.0002379	8.3437	0.15141
6	Histidine metabolism	44	3	D-Erythro-imidazole-glycerol-phosphate, L-Glutamic acid, Formiminoglutamic acid	0.042524	3.1577	0.06211
7	β-Alanine metabolism	28	1	Malonic semialdehyde	0.063968	2.7494	0.16607
8	Propanoate metabolism	35	1	Malonic semialdehyde	0.063968	2.7494	0.09805
9	Alanine, aspartate and glutamate metabolism	24	4	N-Acetyl-L-aspartic acid, Argininosuccinic acid, L-Glutamic acid, Glucosamine 6-phosphate	0.13498	2.0026	0.17664
