# Supplementary material for: Exploring the mechanism of Shendi Bushen capsule in anti-renal fibrosis using metabolomics theory and network analysis
Source: Royal Society of Chemistry journal article supplement (doi:10.1039/d2mo00141a), 2022-08-15
Supplement: d2mo00141a13.xlsx [file d2mo00141a13.xlsx]

## Sheet: Sheet1
Metabolites	Trend	Week 1	Week 2	Week 3	Week 4	Week 5	Week 6
Positive ion model
5,10-Methenyltetrahydrofolic acid	↓	***	***	***	***	***	***
Glucosamine 6-phosphate	↓	***	***	***	***	***	***
Mannose 6-phosphate	↓	***	***	***	***	***	***
N-Acetyl-L-aspartic acid	↓	***	***	***	***	***	***
Argininosuccinic acid	↑	***					*
O-Phospho-4-hydroxy-L-threonine	↑				***	*	***
Negative ion model
L-Glutamic acid	↓	**	*	*	**	**	***
Malonic semialdehyde	↑				***	*	***
Formiminoglutamic acid	↑				**		**
4-Pyridoxic acid	↑				***	*	**
Isopyridoxal	↑				***	**	**
D-Erythro-imidazole-glycerol-phosphate	↑ ↓	↑ ***					↓ ***
*p < 0.05, **p < 0.01, ***p < 0.001
