# Supplementary material for: Exploring the mechanism of Shendi Bushen capsule in anti-renal fibrosis using metabolomics theory and network analysis
Source: Royal Society of Chemistry journal article supplement (doi:10.1039/d2mo00141a), 2022-08-15
Supplement: d2mo00141a14.xlsx [file d2mo00141a14.xlsx]

## Sheet: Sheet1
Metabolites	Week	Content of serum key biomarkers				Trend
		C	M	Ben	SD	M VS C	SD VS M
5,10-Methenyltetrahydrofolic acid	2	3832.57±753.37	1822.21±812.76	403.23±308.73	101.56±149.46	↓	↓
		**	##	##**	##**
	4	3832.57±753.37	1240.73±1468.30	124.71±115.98	16.15±25.84	↓	↓
		**	##	##**	##**
	6	3832.57±753.37	121.29±119.46	181.26±175.90	219.50±159.38	↓
		**	##	##	##
Glucosamine 6-phosphate	2	2621.67±681.67	587.69±875.14	11.76±10.54	8.65±6.73	↓	↓
		**	##	##*	##*
	4	2621.67±681.67	159.48±305.29	12.29±7.15	7.26±11.28	↓
		**	##	##	##
	6	2621.67±681.67	20.17±13.20	16.23±10.64	19.23±10.95	↓	↓
		**	##	##**	##**
Mannose 6-phosphate	2	3993.99±1657.44	658.37±562.42	104.71±33.86	19.75±17.75	↓
		**	##	##	##
	4	3993.99±1657.44	376.98±322.83	114.61±50.24	10.68±15.27	↓
		**	##	##	##
	6	3993.99±1657.44	163.10±76.64	77.63±51.16	163.96±106.49	↓
		**	##	##	##
N-Acetyl-L-aspartic acid	2	1809.50±267.37	1079.39±527.38	721.55±639.88	1386.45±544.83	↓
		*	#	##
	4	1809.50±267.37	831.56±466.08	1004.18±517.93	1816.28±1276.87	↓	↑
		**	##	##	**
	6	1809.50±267.37	815.57±326.13	692.56±334.07	1072.59±534.20	↓
		**	##	##	#
Argininosuccinic acid	2	2643.64±2074.58	7484.57±6550.80	10677.07±6758.95	5601.89±3223.58	↑
		*	#	##
	4	2643.64±2074.58	2940.90±1225.89	7441.96±2999.47	2509.69±1473.76
				#*
	6	2643.64±2074.58	13644.65±5902.50	6642.97±5335.31	4750.60±5670.99	↑	↓
		**	##	**	**
O-Phospho-4-hydroxy-L-threonine	2	1468.32±844.04	12633.49±3289.59	33417.59±19490.08	53161.62±9722.65	↑	↓
				##**	##**
	4	1468.32±844.04	25098.12±8417.82	47656.74±14900.80	101139.75±23233.18	↑	↑
		**	##	##**	##**
	6	1468.32±844.04	56988.21±12315.95	66759.61±9769.49	56133.46±15904.85	↑
		**	##	##	##
L-Glutamic acid	2	4469.38±682.63	3340.32±1151.00	3318.68±892.81	3313.27±844.93	↓
		*	#	#	#
	4	4469.38±682.63	2607.26±979.12	3384.93±1118.68	3452.28±1019.71	↓
		*	##	#	#
	6	4469.38±682.63	2341.52±854.70	3651.84±656.45	3684.89±1176.64	↓
		**	##
Malonic semialdehyde	2	105.32±154.17	59.69±91.68	202.12±240.93	420.70±649.21	↓
	4	105.32±154.17	5402.15±2327.68	224.11±201.83	963.35±1750.63	↑	↓
		**	##	**	**
	6	105.32±154.17	6367.94±2540.14	161.26±173.84	619.34±449.19	↑	↓
		**	##	**	**
Formiminoglutamic acid	2	66.58±52.09	82.79±79.04	186.44±234.5	72.66±67.17
	4	66.58±52.09	999.50±971.64	434.44±390.63	513.38±477.45	↑	↓
		**	##	**	#*
	6	66.58±52.09	968.70±609.37	914.42±574.12	432.36±304.35	↑	↓
		**	##	##	*
4-Pyridoxic acid	2	16166.54±2879.49	9166.31±4485.99	5449.48±1230.11	9146.45±5813.00
	4	16166.54±2879.49	43153.12±17524.26	19009.92±4621.76	29844.44±20449.99	↑	↓
		**	##	**	#*
	6	16166.54±2879.49	38984.64±14130.33	14569.74±5046.96	20756.71±14669.79	↑	↓
		**	##	**	**
Isopyridoxal	2	19035.71±4256.00	12740.07±1099.45	12292.89±2841.96	11857.32±2617.87
	4	19035.71±4256.00	37181.40±9516.54	22672.58±5487.57	26917.59±13397.72	↑	↓
		**	##	**	#**
	6	19035.71±4256.00	31162.77±9960.37	21217.01±5272.99	21860.66±10510.35	↑	↓
		**	##	**	**
D-Erythro-imidazole-glycerol-phosphat	2	464640.00±85081.57	473791.04±56512.41	490775.63±64712.21	433150.00±117561.83
	4	464640.00±85081.57	289500.23±189024.41	425060.89±75465.80	331711.57±246658.78	↓
		*	#	*
	6	464640.00±85081.57	134666.45±123831.67	588954.28±114927.34	417836.68±194071.10	↓	↑
		**	##	#**	**
#P< 0.05, ##P <0.01 compared to control group; *P< 0.05, **P <0.01 compared to model group.
