# Supplementary material for: Exploring the mechanism of Shendi Bushen capsule in anti-renal fibrosis using metabolomics theory and network analysis
Source: Royal Society of Chemistry journal article supplement (doi:10.1039/d2mo00141a), 2022-08-15
Supplement: d2mo00141a15.xlsx [file d2mo00141a15.xlsx]

## Sheet: Sheet1
	C									M									SD										Ben
W1	10	7	11	27	20	7	20	15	10	13	11		12	7	18				10	13	14	18	22	14	8	13	26	20	10	6	7	8	12	8	15	10	30	4.5
W2	4	15	4	32	30	11	24	14	11	8	11		10	7	16				20	15	13	20	20	18	13	6	10	10	12	5	11	9	11	11	9	9	23	5
W3	8	21	12	23	21.5	24	9	23	16	12	12	9	14	18	17	16	13.2	4	22	12	13	22	16	18	11	8	8	10	11	7	12	10	14	8	15	10	32	6
W4	15	6	13	27	20	7	20	21	15	12	12	9	17	10	18.5	22	13.2	4	17	13	14	20	22	14	8	13	26	20	14	5	11	10	12	8	4	8	30	4.5
W5	4	8	4	32	30	11	24	11	10	10	8	7	10	12	15	7	10	5	18	12	13	12	14	18	10	3	9	9	15.5	4.5	10	10	18	15	30	15	25	8
W6	8	41	12	23	21.5	24	9	10		3	10	8	11	14		7	26	17	6.5	10	9	15	10	36	23	8	18	9.5	12	7.5	4	9	15.5	3.5	11	18	36	9
